# Supplementary material for: Proteome-wide analysis of human disease mutations in short linear motifs: neglected players in cancer?
Source: Royal Society of Chemistry journal article supplement (doi:10.1039/c4mb00290c), 2014-07-14
Supplement: c4mb00290c1.zip [file c4mb00290c1.zip]

## Sheet: A) OMIM dataset
uniprotAcc	motif_class	motif_start	motif_end	mutation	disease	pubmed_id
P35222	DEG_SCF_TRCP1_1	32	37	p.D32G	Pilomatrixoma (PTR) [MIM:132600]	10192393
P35222	DEG_SCF_TRCP1_1	32	37	p.D32Y	Pilomatrixoma (PTR) [MIM:132600]	11703283
P35222	DEG_SCF_TRCP1_1	32	37	p.D32Y	Pilomatrixoma (PTR) [MIM:132600]	10192393
P35222	DEG_SCF_TRCP1_1	32	37	p.S33F	Medulloblastoma (MDB) [MIM:155255]	10666372
P35222	DEG_SCF_TRCP1_1	32	37	p.S33F	Pilomatrixoma (PTR) [MIM:132600]	10192393
P35222	DEG_SCF_TRCP1_1	32	37	p.S33Y	Colorectal cancer (CRC) [MIM:114500]	NA
P35222	DEG_SCF_TRCP1_1	32	37	p.S33Y	Pilomatrixoma (PTR) [MIM:132600]	12027456
P35222	DEG_SCF_TRCP1_1	32	37	p.S33Y	Pilomatrixoma (PTR) [MIM:132600]	10192393
P35222	DEG_SCF_TRCP1_1	32	37	p.G34E	Pilomatrixoma (PTR) [MIM:132600]	10192393
P35222	DEG_SCF_TRCP1_1	32	37	p.S37A	Medulloblastoma (MDB) [MIM:155255]	12027456
P35222	DEG_SCF_TRCP1_1	32	37	p.S37A	Medulloblastoma (MDB) [MIM:155255]	10666372
P35222	DEG_SCF_TRCP1_1	32	37	p.S37C	Ovarian cancer (OC) [MIM:167000]	NA
P35222	DEG_SCF_TRCP1_1	32	37	p.S37C	Pilomatrixoma (PTR) [MIM:132600]	10192393
P35222	DEG_SCF_TRCP1_1	32	37	p.S37F	Pilomatrixoma (PTR) [MIM:132600]	10192393
P04049	LIG_14-3-3_1	256	261	p.R256S	Noonan syndrome 5 (NS5) [MIM:611553]	17603483
P04049	LIG_14-3-3_1	256	261	p.S257L	LEOPARD syndrome 2 (LEOPARD2) [MIM:611554]	17603483
P04049	LIG_14-3-3_1	256	261	p.S257L	Noonan syndrome 5 (NS5) [MIM:611553]	17603483
P04049	LIG_14-3-3_1	256	261	p.S257L	Noonan syndrome 5 (NS5) [MIM:611553]	17603482
P04049	LIG_14-3-3_1	256	261	p.S259F	Noonan syndrome 5 (NS5) [MIM:611553]	17603483
P04049	LIG_14-3-3_1	256	261	p.T260R	Noonan syndrome 5 (NS5) [MIM:611553]	17603483
P04049	LIG_14-3-3_1	256	261	p.P261A	Noonan syndrome 5 (NS5) [MIM:611553]	17603482
P04049	LIG_14-3-3_1	256	261	p.P261L	Noonan syndrome 5 (NS5) [MIM:611553]	17603483
P04049	LIG_14-3-3_1	256	261	p.P261S	Noonan syndrome 5 (NS5) [MIM:611553]	17603483
P04049	LIG_14-3-3_1	256	261	p.P261S	Noonan syndrome 5 (NS5) [MIM:611553]	17603482
P04049	LIG_14-3-3_1	256	261	p.P261S	Noonan syndrome 5 (NS5) [MIM:611553]	20683980
P04049	MOD_PKB_1	254	262	p.R256S	Noonan syndrome 5 (NS5) [MIM:611553]	17603483
P04049	MOD_PKB_1	254	262	p.S257L	LEOPARD syndrome 2 (LEOPARD2) [MIM:611554]	17603483
P04049	MOD_PKB_1	254	262	p.S257L	Noonan syndrome 5 (NS5) [MIM:611553]	17603483
P04049	MOD_PKB_1	254	262	p.S257L	Noonan syndrome 5 (NS5) [MIM:611553]	17603482
P04049	MOD_PKB_1	254	262	p.S259F	Noonan syndrome 5 (NS5) [MIM:611553]	17603483
P04049	MOD_PKB_1	254	262	p.T260R	Noonan syndrome 5 (NS5) [MIM:611553]	17603483
P04049	MOD_PKB_1	254	262	p.P261A	Noonan syndrome 5 (NS5) [MIM:611553]	17603482
P04049	MOD_PKB_1	254	262	p.P261L	Noonan syndrome 5 (NS5) [MIM:611553]	17603483
P04049	MOD_PKB_1	254	262	p.P261S	Noonan syndrome 5 (NS5) [MIM:611553]	17603483
P04049	MOD_PKB_1	254	262	p.P261S	Noonan syndrome 5 (NS5) [MIM:611553]	17603482
P04049	MOD_PKB_1	254	262	p.P261S	Noonan syndrome 5 (NS5) [MIM:611553]	20683980
P78314	DOC_ANK_TNKS_1	414	421	p.R415P	Cherubism (CRBM) [MIM:118400]	11381256
P78314	DOC_ANK_TNKS_1	414	421	p.R415Q	Cherubism (CRBM) [MIM:118400]	11381256
P78314	DOC_ANK_TNKS_1	414	421	p.P418H	Cherubism (CRBM) [MIM:118400]	11381256
P78314	DOC_ANK_TNKS_1	414	421	p.P418L	Cherubism (CRBM) [MIM:118400]	11381256
P78314	DOC_ANK_TNKS_1	414	421	p.P418R	Cherubism (CRBM) [MIM:118400]	11381256
P78314	DOC_ANK_TNKS_1	414	421	p.P418R	Cherubism (CRBM) [MIM:118400]	14577811
P78314	DOC_ANK_TNKS_1	414	421	p.G420E	Cherubism (CRBM) [MIM:118400]	11381256
P78314	DOC_ANK_TNKS_1	414	421	p.G420R	Cherubism (CRBM) [MIM:118400]	11381256
P78314	DOC_ANK_TNKS_1	414	421	p.G420R	Cherubism (CRBM) [MIM:118400]	12900899
Q99814	DEG_ODPH_VHL_1	529	542	p.G537W	Familial erythrocytosis 4 (ECYT4) [MIM:611783]	18184961
Q99814	DEG_ODPH_VHL_1	529	542	p.P534L	Familial erythrocytosis 4 (ECYT4) [MIM:611783]	19208626
Q99814	DEG_ODPH_VHL_1	529	542	p.M535T	Familial erythrocytosis 4 (ECYT4) [MIM:611783]	22367913
Q99814	DEG_ODPH_VHL_1	529	542	p.M535V	Familial erythrocytosis 4 (ECYT4) [MIM:611783]	19208626
Q99814	DEG_ODPH_VHL_1	529	542	p.M535V	Familial erythrocytosis 4 (ECYT4) [MIM:611783]	18378852
Q99814	DEG_ODPH_VHL_1	529	542	p.G537R	Familial erythrocytosis 4 (ECYT4) [MIM:611783]	19208626
Q99814	DEG_ODPH_VHL_1	529	542	p.G537R	Familial erythrocytosis 4 (ECYT4) [MIM:611783]	18378852
Q99814	DEG_ODPH_VHL_1	529	542	p.F540L	Familial erythrocytosis 4 (ECYT4) [MIM:611783]	22367913

## Sheet: B) COSMIC dataset
uniprotAcc	motif_class	motif_start	motif_end	mutation	cosmic_sample_id	primary_site	primary_histology	pubmed_id
P35222	DEG_SCF_TRCP1_1	32	37	p.S37C	873332	urinary_tract	carcinoma	12394763
P35222	DEG_SCF_TRCP1_1	32	37	p.S37C	1174112	pituitary	craniopharyngioma	18540944
P35222	DEG_SCF_TRCP1_1	32	37	p.S37C	877656	ovary	carcinoma	11329142
P35222	DEG_SCF_TRCP1_1	32	37	p.S37C	1127372	liver	carcinoma	18282277
P35222	DEG_SCF_TRCP1_1	32	37	p.S37C	1783420	endometrium	carcinoma
P35222	DEG_SCF_TRCP1_1	32	37	p.S37C	1127277	liver	carcinoma	18358501
P35222	DEG_SCF_TRCP1_1	32	37	p.S37C	1566772	liver	carcinoma
P35222	DEG_SCF_TRCP1_1	32	37	p.S37C	875912	ovary	carcinoma	11385321
P35222	DEG_SCF_TRCP1_1	32	37	p.S37C	1783424	endometrium	carcinoma
P35222	DEG_SCF_TRCP1_1	32	37	p.S37C	869325	biliary_tract	carcinoma	11309300
P35222	DEG_SCF_TRCP1_1	32	37	p.I35T	1466595	adrenal_gland	adrenal_cortical_carcinoma	20959480
P35222	DEG_SCF_TRCP1_1	32	37	p.S37C	877570	endometrium	carcinoma	11329142
P35222	DEG_SCF_TRCP1_1	32	37	p.S37C	1174111	pituitary	craniopharyngioma	18540944
P35222	DEG_SCF_TRCP1_1	32	37	p.S37C	874487	pituitary	craniopharyngioma	15221941
P35222	DEG_SCF_TRCP1_1	32	37	p.S37C	867870	ovary	carcinoma	10433945
P35222	DEG_SCF_TRCP1_1	32	37	p.S37C	875586	lung	carcinoma	12754743
P35222	DEG_SCF_TRCP1_1	32	37	p.S37C	1047748	lung	carcinoma	17350138
P35222	DEG_SCF_TRCP1_1	32	37	p.S37C	892822	endometrium	carcinoma	11329142
P35222	DEG_SCF_TRCP1_1	32	37	p.S37C	891776	endometrium	carcinoma	11329142
P35222	DEG_SCF_TRCP1_1	32	37	p.S37C	869478	biliary_tract	other	11196159
P35222	DEG_SCF_TRCP1_1	32	37	p.S37C	869509	stomach	carcinoma	11241321
P35222	DEG_SCF_TRCP1_1	32	37	p.S37C	1176269	pituitary	craniopharyngioma	18540944
P35222	DEG_SCF_TRCP1_1	32	37	p.S37C	876179	lung	carcinoma	11170292
P35222	DEG_SCF_TRCP1_1	32	37	p.S37C	869845	ovary	carcinoma	9537226
P35222	DEG_SCF_TRCP1_1	32	37	p.I35K	1191862	central_nervous_system	primitive_neuroectodermal_tumour-medulloblastoma	19197950
P35222	DEG_SCF_TRCP1_1	32	37	p.S37C	1047750	lung	carcinoma	17350138
P35222	DEG_SCF_TRCP1_1	32	37	p.S37C	1172689	liver	carcinoma	17393110
P35222	DEG_SCF_TRCP1_1	32	37	p.S37C	1176279	pituitary	craniopharyngioma	18540944
P35222	DEG_SCF_TRCP1_1	32	37	p.S37C	1076758	large_intestine	carcinoma	17011185
P35222	DEG_SCF_TRCP1_1	32	37	p.S37C	873743	endometrium	carcinoma	12708483
P35222	DEG_SCF_TRCP1_1	32	37	p.S37C	1174109	pituitary	craniopharyngioma	18540944
P35222	DEG_SCF_TRCP1_1	32	37	p.S37C	877107	lung	carcinoma	11464291
P35222	DEG_SCF_TRCP1_1	32	37	p.S37C	875906	ovary	carcinoma	11385321
P35222	DEG_SCF_TRCP1_1	32	37	p.S37C	1073429	liver	carcinoma	17187432
P35222	DEG_SCF_TRCP1_1	32	37	p.S37C	1173756	liver	carcinoma	18701503
P35222	DEG_SCF_TRCP1_1	32	37	p.S37C	1783373	endometrium	carcinoma
P35222	DEG_SCF_TRCP1_1	32	37	p.S37C	868696	ovary	carcinoma	10417756
P35222	DEG_SCF_TRCP1_1	32	37	p.S37C	1174123	pituitary	craniopharyngioma	18540944
P35222	DEG_SCF_TRCP1_1	32	37	p.S37C	871511	liver	carcinoma	10700176
P35222	DEG_SCF_TRCP1_1	32	37	p.S37C	1176273	pituitary	craniopharyngioma	18540944
P35222	DEG_SCF_TRCP1_1	32	37	p.S37C	910713	central_nervous_system	primitive_neuroectodermal_tumour-medulloblastoma	15176713
P35222	DEG_SCF_TRCP1_1	32	37	p.S37C	875585	lung	carcinoma	12754743
P35222	DEG_SCF_TRCP1_1	32	37	p.S37C	1449920	endometrium	endometriosis	20942669
P35222	DEG_SCF_TRCP1_1	32	37	p.S37C	869273	liver	other	9927029
P35222	DEG_SCF_TRCP1_1	32	37	p.S37C	1783350	endometrium	carcinoma
P35222	DEG_SCF_TRCP1_1	32	37	p.S37C	868189	endometrium	carcinoma	10076565
P35222	DEG_SCF_TRCP1_1	32	37	p.S37C	876555	stomach	adenoma	11238048
P35222	DEG_SCF_TRCP1_1	32	37	p.S37C	877778	biliary_tract	other	12023580
P35222	DEG_SCF_TRCP1_1	32	37	p.S37C	877780	biliary_tract	other	12023580
P35222	DEG_SCF_TRCP1_1	32	37	p.S37C	1652978	liver	carcinoma
P35222	DEG_SCF_TRCP1_1	32	37	p.S37C	873564	lung	carcinoma	12065775
P35222	DEG_SCF_TRCP1_1	32	37	p.S37C	873148	large_intestine	carcinoma	10493496
P35222	DEG_SCF_TRCP1_1	32	37	p.S37C	1174124	pituitary	craniopharyngioma	18540944
P35222	DEG_SCF_TRCP1_1	32	37	p.S37C	877548	endometrium	carcinoma	11329142
P35222	DEG_SCF_TRCP1_1	32	37	p.S37C	1172687	liver	carcinoma	17393110
P35222	DEG_SCF_TRCP1_1	32	37	p.S37C	868983	endometrium	carcinoma	9721853
P35222	DEG_SCF_TRCP1_1	32	37	p.S37C	1869518	endometrium	carcinoma	23028188
P35222	DEG_SCF_TRCP1_1	32	37	p.S37C	1042809	pancreas	carcinoma	16523258
P35222	DEG_SCF_TRCP1_1	32	37	p.S37C	869326	biliary_tract	carcinoma	11309300
P35222	DEG_SCF_TRCP1_1	32	37	p.I35V	1651676	large_intestine	carcinoma
P35222	DEG_SCF_TRCP1_1	32	37	p.S37C	1898080	urinary_tract	carcinoma
P35222	DEG_SCF_TRCP1_1	32	37	p.S37C	915495	skin	adnexal_tumour	15606674
P35222	DEG_SCF_TRCP1_1	32	37	p.S37C	1168078	liver	other	16647953
P35222	DEG_SCF_TRCP1_1	32	37	p.S37C	1042814	pancreas	carcinoma	16523258
P35222	DEG_SCF_TRCP1_1	32	37	p.S37C	875922	ovary	carcinoma	11385321
P35222	DEG_SCF_TRCP1_1	32	37	p.S37C	1172690	liver	carcinoma	17393110
P35222	DEG_SCF_TRCP1_1	32	37	p.S37C	1550290	liver	carcinoma	21457159
P35222	DEG_SCF_TRCP1_1	32	37	p.S37C	1869510	endometrium	carcinoma	23028188
P35222	DEG_SCF_TRCP1_1	32	37	p.S37C	877103	lung	carcinoma	11464291
P35222	DEG_SCF_TRCP1_1	32	37	p.S37C	1783536	endometrium	carcinoma
P35222	DEG_SCF_TRCP1_1	32	37	p.S37C	1815324	ovary	low_malignant_potential_(borderline)_tumour	23174937
P35222	DEG_SCF_TRCP1_1	32	37	p.I35T	1673311	adrenal_gland	adrenal_cortical_carcinoma	22526905
P35222	DEG_SCF_TRCP1_1	32	37	p.S37C	1752583	central_nervous_system	primitive_neuroectodermal_tumour-medulloblastoma	22832581
P35222	DEG_SCF_TRCP1_1	32	37	p.S37C	1753944	pituitary	craniopharyngioma	21562037
P35222	DEG_SCF_TRCP1_1	32	37	p.S37C	1669776	pancreas	carcinoma	21769465
P35222	DEG_SCF_TRCP1_1	32	37	p.S37C	877779	biliary_tract	other	12023580
P35222	DEG_SCF_TRCP1_1	32	37	p.S37C	869629	central_nervous_system	primitive_neuroectodermal_tumour-medulloblastoma	9500446
P35222	DEG_SCF_TRCP1_1	32	37	p.S37C	1780201	lung	carcinoma
P35222	DEG_SCF_TRCP1_1	32	37	p.S37C	873393	liver	carcinoma	12439747
P35222	DEG_SCF_TRCP1_1	32	37	p.S37C	1176270	pituitary	craniopharyngioma	18540944
P35222	DEG_SCF_TRCP1_1	32	37	p.S37C	1176275	pituitary	craniopharyngioma	18540944
P35222	DEG_SCF_TRCP1_1	32	37	p.S37C	1130543	liver	carcinoma	17510384
P35222	DEG_SCF_TRCP1_1	32	37	p.S37C	877782	biliary_tract	other	12023580
P35222	DEG_SCF_TRCP1_1	32	37	p.S37C	1172634	adrenal_gland	adrenal_cortical_adenoma	17854394
P35222	DEG_SCF_TRCP1_1	32	37	p.S37C	1713800	liver	carcinoma	22561517
P35222	DEG_SCF_TRCP1_1	32	37	p.S37C	1918902	liver	carcinoma
P35222	DEG_SCF_TRCP1_1	32	37	p.S37C	1042604	skin	adnexal_tumour	16378715
P35222	DEG_SCF_TRCP1_1	32	37	p.S37C	1512997	central_nervous_system	primitive_neuroectodermal_tumour-medulloblastoma	21163964
P35222	DEG_SCF_TRCP1_1	32	37	p.S37C	1065194	ovary	carcinoma	17258789
P35222	DEG_SCF_TRCP1_1	32	37	p.S37C	979744	ovary	carcinoma	15668893
P35222	DEG_SCF_TRCP1_1	32	37	p.S37C	870460	urinary_tract	carcinoma	11585741
P35222	DEG_SCF_TRCP1_1	32	37	p.S37C	875455	bone	calcifying_odontogenic_cyst	14578169
P35222	DEG_SCF_TRCP1_1	32	37	p.S37C	1172688	liver	carcinoma	17393110
P35222	DEG_SCF_TRCP1_1	32	37	p.S37C	1783466	endometrium	carcinoma
P35222	DEG_SCF_TRCP1_1	32	37	p.S37C	868692	ovary	carcinoma	10417756
P35222	DEG_SCF_TRCP1_1	32	37	p.S37C	868413	ovary	carcinoma	10391090
P35222	DEG_SCF_TRCP1_1	32	37	p.S37C	1449913	ovary	carcinoma	20942669
P35222	DEG_SCF_TRCP1_1	32	37	p.S37C	873744	endometrium	carcinoma	12708483
P35222	DEG_SCF_TRCP1_1	32	37	p.S37C	878139	liver	other	12101426
P35222	DEG_SCF_TRCP1_1	32	37	p.S37C	870354	central_nervous_system	primitive_neuroectodermal_tumour-medulloblastoma	11433413
P35222	DEG_SCF_TRCP1_1	32	37	p.S37C	877783	biliary_tract	other	12023580
P35222	DEG_SCF_TRCP1_1	32	37	p.S37C	877781	biliary_tract	other	12023580
P35222	DEG_SCF_TRCP1_1	32	37	p.S37C	1713822	liver	carcinoma	22561517
P35222	DEG_SCF_TRCP1_1	32	37	p.S37C	873737	endometrium	carcinoma	12708483
P35222	DEG_SCF_TRCP1_1	32	37	p.S37C	891786	endometrium	carcinoma	11329142
P35222	DEG_SCF_TRCP1_1	32	37	p.S37C	877777	biliary_tract	other	12023580
P35222	DEG_SCF_TRCP1_1	32	37	p.S37C	1783498	endometrium	carcinoma
P35222	DEG_SCF_TRCP1_1	32	37	p.S37C	877557	endometrium	carcinoma	11329142
P35222	DEG_SCF_TRCP1_1	32	37	p.S37C	878127	liver	other	12101426
P35222	DEG_SCF_TRCP1_1	32	37	p.S37C	875580	lung	carcinoma	12754743
P35222	DEG_SCF_TRCP1_1	32	37	p.S37C	1047749	lung	carcinoma	17350138
P35222	DEG_SCF_TRCP1_1	32	37	p.S37C	1752610	central_nervous_system	primitive_neuroectodermal_tumour-medulloblastoma	22832581
P35222	DEG_SCF_TRCP1_1	32	37	p.S37C	1042140	pituitary	craniopharyngioma	15891929
P35222	DEG_SCF_TRCP1_1	32	37	p.S37C	1042757	pancreas	carcinoma	16967453
P35222	DEG_SCF_TRCP1_1	32	37	p.S37C	1041551	central_nervous_system	primitive_neuroectodermal_tumour-medulloblastoma	16258095
P35222	DEG_SCF_TRCP1_1	32	37	p.S37C	876554	stomach	adenoma	11238048
P35222	DEG_SCF_TRCP1_1	32	37	p.S37C	877635	ovary	carcinoma	11329142
P35222	DEG_SCF_TRCP1_1	32	37	p.S37C	874410	pancreas	carcinoma	14645696
P35222	DEG_SCF_TRCP1_1	32	37	p.S37C	868695	ovary	carcinoma	10417756
P35222	DEG_SCF_TRCP1_1	32	37	p.S37C	1512039	urinary_tract	carcinoma	21533174
P35222	DEG_SCF_TRCP1_1	32	37	p.S37C	873764	skin	adnexal_tumour	12575848
P35222	DEG_SCF_TRCP1_1	32	37	p.S37C	868409	ovary	carcinoma	10391090
P35222	DEG_SCF_TRCP1_1	32	37	p.S37C	868681	skin	adnexal_tumour	10192393
P35222	DEG_SCF_TRCP1_1	32	37	p.S37C	876312	endometrium	carcinoma	11161379
P35222	DEG_SCF_TRCP1_1	32	37	p.S37C	876313	endometrium	carcinoma	11161379
P35222	DEG_SCF_TRCP1_1	32	37	p.S37C	868697	ovary	carcinoma	10417756
P35222	DEG_SCF_TRCP1_1	32	37	p.S37C	874766	liver	carcinoma	12845670
P35222	DEG_SCF_TRCP1_1	32	37	p.S37C	1168077	liver	other	16647953
P35222	DEG_SCF_TRCP1_1	32	37	p.S37C	877590	endometrium	carcinoma	11329142
P35222	DEG_SCF_TRCP1_1	32	37	p.S37C	1869517	endometrium	carcinoma	23028188
P35222	DEG_SCF_TRCP1_1	32	37	p.S37C	868694	ovary	carcinoma	10417756
P35222	DEG_SCF_TRCP1_1	32	37	p.S37C	871785	liver	carcinoma	10980116
P35222	DEG_SCF_TRCP1_1	32	37	p.S37C	1173754	liver	carcinoma	18701503
P35222	DEG_SCF_TRCP1_1	32	37	p.S37C	891790	endometrium	carcinoma	11329142
P35222	DEG_SCF_TRCP1_1	32	37	p.S37C	875277	ovary	carcinoma	11719457
P35222	DEG_SCF_TRCP1_1	32	37	p.S37C	1434207	endometrium	carcinoma	18552176
P35222	DEG_SCF_TRCP1_1	32	37	p.S37C	1065212	ovary	carcinoma	17258789
P35222	DEG_SCF_TRCP1_1	32	37	p.S37C	1042804	pancreas	carcinoma	16523258
P35222	DEG_SCF_TRCP1_1	32	37	p.S37C	877605	endometrium	carcinoma	11329142
P35222	DEG_SCF_TRCP1_1	32	37	p.S37C	873661	stomach	adenoma	11956818
P35222	DEG_SCF_TRCP1_1	32	37	p.S37C	1042761	pancreas	carcinoma	16967453
P35222	DEG_SCF_TRCP1_1	32	37	p.S37C	876311	endometrium	carcinoma	11161379
P35222	DEG_SCF_TRCP1_1	32	37	p.S37C	1042152	pituitary	craniopharyngioma	15891929
P35222	DEG_SCF_TRCP1_1	32	37	p.S37C	873738	endometrium	carcinoma	12708483
P35222	DEG_SCF_TRCP1_1	32	37	p.S37C	1071838	central_nervous_system	primitive_neuroectodermal_tumour-medulloblastoma	17172831
P35222	DEG_SCF_TRCP1_1	32	37	p.S37C	1783390	endometrium	carcinoma
P35222	DEG_SCF_TRCP1_1	32	37	p.S37C	868326	endometrium	carcinoma	10416591
P35222	DEG_SCF_TRCP1_1	32	37	p.S37C	868693	ovary	carcinoma	10417756
P35222	DEG_SCF_TRCP1_1	32	37	p.S37C	1449919	ovary	carcinoma	20942669
P35222	DEG_SCF_TRCP1_1	32	37	p.S37C	1127616	liver	carcinoma	18467159
P35222	DEG_SCF_TRCP1_1	32	37	p.S37C	1042165	pituitary	craniopharyngioma	15891929
P35222	DEG_SCF_TRCP1_1	32	37	p.S37F	1120998	endometrium	carcinoma	18500270
P35222	DEG_SCF_TRCP1_1	32	37	p.S37F	738798	endometrium	carcinoma	12015762
P35222	DEG_SCF_TRCP1_1	32	37	p.S37F	1669762	pancreas	carcinoma	21769465
P35222	DEG_SCF_TRCP1_1	32	37	p.S37F	1287069	thyroid	carcinoma	19534622
P35222	DEG_SCF_TRCP1_1	32	37	p.S37F	1783486	endometrium	carcinoma
P35222	DEG_SCF_TRCP1_1	32	37	p.S37F	876680	skin	malignant_melanoma	9065403
P35222	DEG_SCF_TRCP1_1	32	37	p.S37F	1783515	endometrium	carcinoma
P35222	DEG_SCF_TRCP1_1	32	37	p.S37F	1042621	skin	malignant_melanoma	16470173
P35222	DEG_SCF_TRCP1_1	32	37	p.S37F	873651	stomach	adenoma	11956818
P35222	DEG_SCF_TRCP1_1	32	37	p.S37F	907073	small_intestine	carcinoma
P35222	DEG_SCF_TRCP1_1	32	37	p.S37F	1752575	central_nervous_system	primitive_neuroectodermal_tumour-medulloblastoma	22832581
P35222	DEG_SCF_TRCP1_1	32	37	p.S37F	868034	thyroid	carcinoma	10213482
P35222	DEG_SCF_TRCP1_1	32	37	p.S37F	877569	endometrium	carcinoma	11329142
P35222	DEG_SCF_TRCP1_1	32	37	p.S37F	876549	stomach	adenoma	11238048
P35222	DEG_SCF_TRCP1_1	32	37	p.S37F	1042622	skin	malignant_melanoma	16470173
P35222	DEG_SCF_TRCP1_1	32	37	p.S37F	873760	skin	adnexal_tumour	12575848
P35222	DEG_SCF_TRCP1_1	32	37	p.S37F	870823	oesophagus	carcinoma	11048797
P35222	DEG_SCF_TRCP1_1	32	37	p.S37F	876550	stomach	adenoma	11238048
P35222	DEG_SCF_TRCP1_1	32	37	p.S37F	738773	pancreas	carcinoma	11943721
P35222	DEG_SCF_TRCP1_1	32	37	p.S37F	877562	endometrium	carcinoma	11329142
P35222	DEG_SCF_TRCP1_1	32	37	p.S37F	868682	skin	adnexal_tumour	10192393
P35222	DEG_SCF_TRCP1_1	32	37	p.S37F	869486	biliary_tract	carcinoma	11196159
P35222	DEG_SCF_TRCP1_1	32	37	p.S37F	873768	pancreas	other	12632098
P35222	DEG_SCF_TRCP1_1	32	37	p.S37F	876542	stomach	adenoma	11238048
P35222	DEG_SCF_TRCP1_1	32	37	p.S37F	876305	endometrium	carcinoma	11161379
P35222	DEG_SCF_TRCP1_1	32	37	p.S37F	1041030	large_intestine	carcinoma	16356174
P35222	DEG_SCF_TRCP1_1	32	37	p.S37F	915494	skin	adnexal_tumour	15606674
P35222	DEG_SCF_TRCP1_1	32	37	p.S37F	876304	endometrium	carcinoma	11161379
P35222	DEG_SCF_TRCP1_1	32	37	p.S37F	878682	soft_tissue	malignant_fibrous_histiocytoma-pleomorphic_sarcoma	12204056
P35222	DEG_SCF_TRCP1_1	32	37	p.S37F	1042046	oesophagus	carcinoma	16114033
P35222	DEG_SCF_TRCP1_1	32	37	p.S37F	876540	stomach	adenoma	11238048
P35222	DEG_SCF_TRCP1_1	32	37	p.S37F	1839744	central_nervous_system	primitive_neuroectodermal_tumour-medulloblastoma	23278988
P35222	DEG_SCF_TRCP1_1	32	37	p.S37F	1629196	pituitary	craniopharyngioma	22086512
P35222	DEG_SCF_TRCP1_1	32	37	p.S37F	875564	lung	carcinoma	15223963
P35222	DEG_SCF_TRCP1_1	32	37	p.S37F	876569	liver	other	11666046
P35222	DEG_SCF_TRCP1_1	32	37	p.S37F	868319	endometrium	carcinoma	10416591
P35222	DEG_SCF_TRCP1_1	32	37	p.S37F	891780	endometrium	carcinoma	11329142
P35222	DEG_SCF_TRCP1_1	32	37	p.S37F	1042626	skin	malignant_melanoma	16470173
P35222	DEG_SCF_TRCP1_1	32	37	p.S37F	868318	endometrium	carcinoma	10416591
P35222	DEG_SCF_TRCP1_1	32	37	p.S37F	1918906	liver	carcinoma
P35222	DEG_SCF_TRCP1_1	32	37	p.S37F	873759	skin	adnexal_tumour	12575848
P35222	DEG_SCF_TRCP1_1	32	37	p.S37F	869475	biliary_tract	other	11196159
P35222	DEG_SCF_TRCP1_1	32	37	p.S37F	1520642	lung	carcinoma	20668451
P35222	DEG_SCF_TRCP1_1	32	37	p.S37F	1783313	endometrium	carcinoma
P35222	DEG_SCF_TRCP1_1	32	37	p.S37F	874906	pituitary	craniopharyngioma	12466115
P35222	DEG_SCF_TRCP1_1	32	37	p.S37F	1891922	oesophagus	carcinoma	23525077
P35222	DEG_SCF_TRCP1_1	32	37	p.S37F	875921	ovary	carcinoma	11385321
P35222	DEG_SCF_TRCP1_1	32	37	p.S37F	876546	stomach	adenoma	11238048
P35222	DEG_SCF_TRCP1_1	32	37	p.S37F	869510	stomach	carcinoma	11241321
P35222	DEG_SCF_TRCP1_1	32	37	p.S37F	873747	endometrium	hyperplasia	12708483
P35222	DEG_SCF_TRCP1_1	32	37	p.S37F	1669766	pancreas	carcinoma	21769465
P35222	DEG_SCF_TRCP1_1	32	37	p.S37F	1492242	liver	other	21237236
P35222	DEG_SCF_TRCP1_1	32	37	p.S37F	1423772	lung	carcinoma	18948947
P35222	DEG_SCF_TRCP1_1	32	37	p.S37F	870469	pancreas	carcinoma	11731417
P35222	DEG_SCF_TRCP1_1	32	37	p.S37F	877790	biliary_tract	other	12023580
P35222	DEG_SCF_TRCP1_1	32	37	p.S37F	1839746	central_nervous_system	primitive_neuroectodermal_tumour-medulloblastoma	23278988
P35222	DEG_SCF_TRCP1_1	32	37	p.S37F	871812	liver	carcinoma	10980116
P35222	DEG_SCF_TRCP1_1	32	37	p.S37F	1752611	central_nervous_system	primitive_neuroectodermal_tumour-medulloblastoma	22832581
P35222	DEG_SCF_TRCP1_1	32	37	p.S37F	1126558	liver	carcinoma	17531558
P35222	DEG_SCF_TRCP1_1	32	37	p.S37F	877280	skin	malignant_melanoma	8642260
P35222	DEG_SCF_TRCP1_1	32	37	p.S37F	875561	lung	carcinoma	15223963
P35222	DEG_SCF_TRCP1_1	32	37	p.S37F	915500	skin	adnexal_tumour	15606674
P35222	DEG_SCF_TRCP1_1	32	37	p.S37F	873694	stomach	adenoma	11956818
P35222	DEG_SCF_TRCP1_1	32	37	p.S37F	1042624	skin	malignant_melanoma	16470173
P35222	DEG_SCF_TRCP1_1	32	37	p.S37F	875563	lung	carcinoma	15223963
P35222	DEG_SCF_TRCP1_1	32	37	p.S37F	867871	ovary	carcinoma	10433945
P35222	DEG_SCF_TRCP1_1	32	37	p.S37F	1783534	endometrium	carcinoma
P35222	DEG_SCF_TRCP1_1	32	37	p.S37F	878419	stomach	adenoma	12414520
P35222	DEG_SCF_TRCP1_1	32	37	p.S37F	1669754	pancreas	carcinoma	21769465
P35222	DEG_SCF_TRCP1_1	32	37	p.S37F	876538	stomach	adenoma	11238048
P35222	DEG_SCF_TRCP1_1	32	37	p.S37F	1042390	ovary	low_malignant_potential_(borderline)_tumour	16429393
P35222	DEG_SCF_TRCP1_1	32	37	p.S37F	870793	endometrium	carcinoma	11048799
P35222	DEG_SCF_TRCP1_1	32	37	p.S37F	1512012	urinary_tract	carcinoma	21533174
P35222	DEG_SCF_TRCP1_1	32	37	p.S37F	868039	thyroid	carcinoma	10213482
P35222	DEG_SCF_TRCP1_1	32	37	p.S37F	876682	skin	malignant_melanoma	9065403
P35222	DEG_SCF_TRCP1_1	32	37	p.S37F	873660	stomach	adenoma	11956818
P35222	DEG_SCF_TRCP1_1	32	37	p.S37F	1732869	central_nervous_system	primitive_neuroectodermal_tumour-medulloblastoma	22722829
P35222	DEG_SCF_TRCP1_1	32	37	p.S37F	1127615	liver	carcinoma	18467159
P35222	DEG_SCF_TRCP1_1	32	37	p.S37F	1472661	central_nervous_system	primitive_neuroectodermal_tumour-medulloblastoma	21060032
P35222	DEG_SCF_TRCP1_1	32	37	p.S37F	1687118	skin	malignant_melanoma	22536370
P35222	DEG_SCF_TRCP1_1	32	37	p.S37F	874409	pancreas	carcinoma	14645696
P35222	DEG_SCF_TRCP1_1	32	37	p.S37F	1652918	central_nervous_system	primitive_neuroectodermal_tumour-medulloblastoma	22832583
P35222	DEG_SCF_TRCP1_1	32	37	p.S37F	1071819	central_nervous_system	primitive_neuroectodermal_tumour-medulloblastoma	17172831
P35222	DEG_SCF_TRCP1_1	32	37	p.S37F	869844	ovary	low_malignant_potential_(borderline)_tumour	9537226
P35222	DEG_SCF_TRCP1_1	32	37	p.S37F	876307	endometrium	carcinoma	11161379
P35222	DEG_SCF_TRCP1_1	32	37	p.S37F	1753962	pituitary	craniopharyngioma	21562037
P35222	DEG_SCF_TRCP1_1	32	37	p.S37F	1914062	lung	carcinoma
P35222	DEG_SCF_TRCP1_1	32	37	p.S37F	876732	cervix	carcinoma	11520139
P35222	DEG_SCF_TRCP1_1	32	37	p.S37F	1932046	urinary_tract	carcinoma	23384396
P35222	DEG_SCF_TRCP1_1	32	37	p.S37F	876547	stomach	adenoma	11238048
P35222	DEG_SCF_TRCP1_1	32	37	p.S37F	738780	pancreas	carcinoma	11943721
P35222	DEG_SCF_TRCP1_1	32	37	p.S37F	876544	stomach	adenoma	11238048
P35222	DEG_SCF_TRCP1_1	32	37	p.S37F	1839743	central_nervous_system	primitive_neuroectodermal_tumour-medulloblastoma	23278988
P35222	DEG_SCF_TRCP1_1	32	37	p.S37F	1121003	endometrium	carcinoma	18500270
P35222	DEG_SCF_TRCP1_1	32	37	p.S37F	979742	ovary	carcinoma	15668893
P35222	DEG_SCF_TRCP1_1	32	37	p.S37F	876539	stomach	adenoma	11238048
P35222	DEG_SCF_TRCP1_1	32	37	p.S37F	1839745	central_nervous_system	primitive_neuroectodermal_tumour-medulloblastoma	23278988
P35222	DEG_SCF_TRCP1_1	32	37	p.S37F	1783376	endometrium	carcinoma
P35222	DEG_SCF_TRCP1_1	32	37	p.S37F	1765129	lung	carcinoma	22980975
P35222	DEG_SCF_TRCP1_1	32	37	p.S37F	877604	endometrium	carcinoma	11329142
P35222	DEG_SCF_TRCP1_1	32	37	p.S37F	1042395	ovary	low_malignant_potential_(borderline)_tumour	16429393
P35222	DEG_SCF_TRCP1_1	32	37	p.S37F	869477	biliary_tract	other	11196159
P35222	DEG_SCF_TRCP1_1	32	37	p.S37F	873684	stomach	adenoma	11956818
P35222	DEG_SCF_TRCP1_1	32	37	p.S37F	876548	stomach	adenoma	11238048
P35222	DEG_SCF_TRCP1_1	32	37	p.S37F	874902	pituitary	craniopharyngioma	12466115
P35222	DEG_SCF_TRCP1_1	32	37	p.S37F	871783	liver	carcinoma	10980116
P35222	DEG_SCF_TRCP1_1	32	37	p.S37F	891787	endometrium	carcinoma	11329142
P35222	DEG_SCF_TRCP1_1	32	37	p.S37F	1131742	ovary	carcinoma	17418409
P35222	DEG_SCF_TRCP1_1	32	37	p.S37F	877281	skin	malignant_melanoma	8642260
P35222	DEG_SCF_TRCP1_1	32	37	p.S37F	876416	skin	adnexal_tumour	11472567
P35222	DEG_SCF_TRCP1_1	32	37	p.S37F	1783431	endometrium	carcinoma
P35222	DEG_SCF_TRCP1_1	32	37	p.S37F	874903	pituitary	craniopharyngioma	12466115
P35222	DEG_SCF_TRCP1_1	32	37	p.S37F	1520752	ovary	other	20668451
P35222	DEG_SCF_TRCP1_1	32	37	p.S37F	867683	endometrium	carcinoma	11957146
P35222	DEG_SCF_TRCP1_1	32	37	p.S37F	876545	stomach	adenoma	11238048
P35222	DEG_SCF_TRCP1_1	32	37	p.S37F	1783439	endometrium	carcinoma
P35222	DEG_SCF_TRCP1_1	32	37	p.S37F	873662	stomach	adenoma	11956818
P35222	DEG_SCF_TRCP1_1	32	37	p.S37F	877552	endometrium	carcinoma	11329142
P35222	DEG_SCF_TRCP1_1	32	37	p.S37F	1042747	pancreas	carcinoma	16287495
P35222	DEG_SCF_TRCP1_1	32	37	p.S37F	870766	soft_tissue	synovial_sarcoma	11054718
P35222	DEG_SCF_TRCP1_1	32	37	p.S37F	738788	pancreas	carcinoma	11943721
P35222	DEG_SCF_TRCP1_1	32	37	p.S37F	1707645	stomach	carcinoma	22723903
P35222	DEG_SCF_TRCP1_1	32	37	p.S37F	738784	pancreas	carcinoma	11943721
P35222	DEG_SCF_TRCP1_1	32	37	p.S37F	1919204	liver	carcinoma
P35222	DEG_SCF_TRCP1_1	32	37	p.S37F	1173749	liver	carcinoma	18701503
P35222	DEG_SCF_TRCP1_1	32	37	p.S37F	1127613	liver	carcinoma	18467159
P35222	DEG_SCF_TRCP1_1	32	37	p.S37F	876679	skin	malignant_melanoma	9065403
P35222	DEG_SCF_TRCP1_1	32	37	p.S37F	1890881	oesophagus	carcinoma	23525077
P35222	DEG_SCF_TRCP1_1	32	37	p.S37F	1042746	pancreas	carcinoma	16287495
P35222	DEG_SCF_TRCP1_1	32	37	p.S37F	1752599	central_nervous_system	primitive_neuroectodermal_tumour-medulloblastoma	22832581
P35222	DEG_SCF_TRCP1_1	32	37	p.S37F	876417	skin	adnexal_tumour	11472567
P35222	DEG_SCF_TRCP1_1	32	37	p.S37F	1434219	endometrium	carcinoma	18552176
P35222	DEG_SCF_TRCP1_1	32	37	p.S37F	1127649	liver	carcinoma	18467159
P35222	DEG_SCF_TRCP1_1	32	37	p.S37F	1042623	skin	malignant_melanoma	16470173
P35222	DEG_SCF_TRCP1_1	32	37	p.S37F	891785	endometrium	carcinoma	11329142
P35222	DEG_SCF_TRCP1_1	32	37	p.S37F	1042751	pancreas	carcinoma	16967453
P35222	DEG_SCF_TRCP1_1	32	37	p.S37F	875560	lung	carcinoma	15223963
P35222	DEG_SCF_TRCP1_1	32	37	p.S37F	1753952	pituitary	craniopharyngioma	21562037
P35222	DEG_SCF_TRCP1_1	32	37	p.S37F	1919257	liver	carcinoma
P35222	DEG_SCF_TRCP1_1	32	37	p.S37F	738785	pancreas	carcinoma	11943721
P35222	DEG_SCF_TRCP1_1	32	37	p.S37F	891777	endometrium	carcinoma	11329142
P35222	DEG_SCF_TRCP1_1	32	37	p.S37F	1127614	liver	carcinoma	18467159
P35222	DEG_SCF_TRCP1_1	32	37	p.S37F	1184023	central_nervous_system	primitive_neuroectodermal_tumour-medulloblastoma	18769486
P35222	DEG_SCF_TRCP1_1	32	37	p.S37F	876180	lung	carcinoma	11170292
P35222	DEG_SCF_TRCP1_1	32	37	p.S37F	948867	pancreas	other	11696422
P35222	DEG_SCF_TRCP1_1	32	37	p.S37F	1214181	skin	carcinoma	19384065
P35222	DEG_SCF_TRCP1_1	32	37	p.S37F	872808	liver	carcinoma	10665646
P35222	DEG_SCF_TRCP1_1	32	37	p.S37F	1173740	liver	carcinoma	18701503
P35222	DEG_SCF_TRCP1_1	32	37	p.S37F	878701	stomach	carcinoma	12067995
P35222	DEG_SCF_TRCP1_1	32	37	p.S37F	877572	endometrium	carcinoma	11329142
P35222	DEG_SCF_TRCP1_1	32	37	p.S37F	1706955	lung	carcinoma	22705117
P35222	DEG_SCF_TRCP1_1	32	37	p.S37F	1042227	pituitary	craniopharyngioma	15980970
P35222	DEG_SCF_TRCP1_1	32	37	p.S37F	1042625	skin	malignant_melanoma	16470173
P35222	DEG_SCF_TRCP1_1	32	37	p.S37F	1042806	pancreas	carcinoma	16523258
P35222	DEG_SCF_TRCP1_1	32	37	p.S37F	877551	endometrium	carcinoma	11329142
P35222	DEG_SCF_TRCP1_1	32	37	p.S37F	876418	skin	adnexal_tumour	11472567
P35222	DEG_SCF_TRCP1_1	32	37	p.S37F	1783506	endometrium	carcinoma
P35222	DEG_SCF_TRCP1_1	32	37	p.S37F	1189006	liver	carcinoma	19101982
P35222	DEG_SCF_TRCP1_1	32	37	p.S37F	870824	oesophagus	carcinoma	11048797
P35222	DEG_SCF_TRCP1_1	32	37	p.S37F	1509111	central_nervous_system	primitive_neuroectodermal_tumour-medulloblastoma	21358093
P35222	DEG_SCF_TRCP1_1	32	37	p.S37F	1691658	pancreas	carcinoma	22158988
P35222	DEG_SCF_TRCP1_1	32	37	p.S37F	1737647	liver	carcinoma	22634756
P35222	DEG_SCF_TRCP1_1	32	37	p.S37F	876541	stomach	adenoma	11238048
P35222	DEG_SCF_TRCP1_1	32	37	p.S37F	872230	liver	other	10754205
P35222	DEG_SCF_TRCP1_1	32	37	p.S37F	868031	thyroid	carcinoma	10213482
P35222	DEG_SCF_TRCP1_1	32	37	p.S37F	738776	pancreas	carcinoma	11943721
P35222	DEG_SCF_TRCP1_1	32	37	p.S37F	871784	liver	carcinoma	10980116
P35222	DEG_SCF_TRCP1_1	32	37	p.S37F	1780069	lung	carcinoma
P35222	DEG_SCF_TRCP1_1	32	37	p.S37F	869476	biliary_tract	other	11196159
P35222	DEG_SCF_TRCP1_1	32	37	p.S37F	868192	endometrium	carcinoma	10076565
P35222	DEG_SCF_TRCP1_1	32	37	p.S37F	876306	endometrium	carcinoma	11161379
P35222	DEG_SCF_TRCP1_1	32	37	p.S37F	877578	endometrium	carcinoma	11329142
P35222	DEG_SCF_TRCP1_1	32	37	p.S37F	875919	ovary	carcinoma	11385321
P35222	DEG_SCF_TRCP1_1	32	37	p.S37F	1127373	liver	carcinoma	18282277
P35222	DEG_SCF_TRCP1_1	32	37	p.S37F	875920	ovary	carcinoma	11385321
P35222	DEG_SCF_TRCP1_1	32	37	p.S37F	1932045	urinary_tract	carcinoma	23384396
P35222	DEG_SCF_TRCP1_1	32	37	p.S37F	876543	stomach	adenoma	11238048
P35222	DEG_SCF_TRCP1_1	32	37	p.S37F	1227798	skin	carcinoma	19384065
P35222	DEG_SCF_TRCP1_1	32	37	p.S37F	1752613	central_nervous_system	primitive_neuroectodermal_tumour-medulloblastoma	22832581
P35222	DEG_SCF_TRCP1_1	32	37	p.S37F	1943739	stomach	adenocarcinoma	22037554
P35222	DEG_SCF_TRCP1_1	32	37	p.S37F	1189004	liver	carcinoma	19101982
P35222	DEG_SCF_TRCP1_1	32	37	p.S37F	873769	pancreas	other	12632098
P35222	DEG_SCF_TRCP1_1	32	37	p.S37F	876681	skin	malignant_melanoma	9065403
P35222	DEG_SCF_TRCP1_1	32	37	p.S37F	1072022	stomach	carcinoma	17163846
P35222	DEG_SCF_TRCP1_1	32	37	p.S37F	876415	skin	adnexal_tumour	11472567
P35222	DEG_SCF_TRCP1_1	32	37	p.S37F	1065213	ovary	carcinoma	17258789
P35222	DEG_SCF_TRCP1_1	32	37	p.S37F	869450	soft_tissue	juvenile_angiofibroma	11238055
P35222	DEG_SCF_TRCP1_1	32	37	p.S33T	1719622	soft_tissue	desmoid_tumour-fibromatosis	22766794
P35222	DEG_SCF_TRCP1_1	32	37	p.S33C	1009645	ovary	carcinoma	16021566
P35222	DEG_SCF_TRCP1_1	32	37	p.S33C	1009646	large_intestine	carcinoma	16021566
P35222	DEG_SCF_TRCP1_1	32	37	p.S33C	1870291	skin	malignant_melanoma	23239741
P35222	DEG_SCF_TRCP1_1	32	37	p.S33C	1597940	liver	carcinoma	20923573
P35222	DEG_SCF_TRCP1_1	32	37	p.S33C	1622594	liver	other	21992464
P35222	DEG_SCF_TRCP1_1	32	37	p.S33C	1597946	liver	carcinoma	20923573
P35222	DEG_SCF_TRCP1_1	32	37	p.S33C	1479471	central_nervous_system	primitive_neuroectodermal_tumour-medulloblastoma	21150899
P35222	DEG_SCF_TRCP1_1	32	37	p.S33C	1745423	endometrium	carcinoma	22635024
P35222	DEG_SCF_TRCP1_1	32	37	p.S33C	1745422	endometrium	carcinoma	22635024
P35222	DEG_SCF_TRCP1_1	32	37	p.S33C	869627	central_nervous_system	primitive_neuroectodermal_tumour-medulloblastoma	9500446
P35222	DEG_SCF_TRCP1_1	32	37	p.S33C	910711	central_nervous_system	primitive_neuroectodermal_tumour-medulloblastoma	15176713
P35222	DEG_SCF_TRCP1_1	32	37	p.S33C	1752590	central_nervous_system	primitive_neuroectodermal_tumour-medulloblastoma	22832581
P35222	DEG_SCF_TRCP1_1	32	37	p.S33C	1620053	biliary_tract	carcinoma	16142313
P35222	DEG_SCF_TRCP1_1	32	37	p.S33C	873686	stomach	adenoma	11956818
P35222	DEG_SCF_TRCP1_1	32	37	p.S33C	1752582	central_nervous_system	primitive_neuroectodermal_tumour-medulloblastoma	22832581
P35222	DEG_SCF_TRCP1_1	32	37	p.S33C	1042752	pancreas	carcinoma	16967453
P35222	DEG_SCF_TRCP1_1	32	37	p.S33C	1650925	large_intestine	carcinoma
P35222	DEG_SCF_TRCP1_1	32	37	p.S33C	873442	endometrium	carcinoma	12439748
P35222	DEG_SCF_TRCP1_1	32	37	p.S33C	1472664	central_nervous_system	primitive_neuroectodermal_tumour-medulloblastoma	21060032
P35222	DEG_SCF_TRCP1_1	32	37	p.S33C	1127631	liver	carcinoma	18467159
P35222	DEG_SCF_TRCP1_1	32	37	p.S33C	1783477	endometrium	carcinoma
P35222	DEG_SCF_TRCP1_1	32	37	p.S33C	1173761	liver	carcinoma	18701503
P35222	DEG_SCF_TRCP1_1	32	37	p.S33C	1753964	pituitary	craniopharyngioma	21562037
P35222	DEG_SCF_TRCP1_1	32	37	p.S33C	1127368	liver	carcinoma	18282277
P35222	DEG_SCF_TRCP1_1	32	37	p.S33C	1752567	central_nervous_system	primitive_neuroectodermal_tumour-medulloblastoma	22832581
P35222	DEG_SCF_TRCP1_1	32	37	p.S33C	1629569	ovary	microcystic_stromal_tumour	21881488
P35222	DEG_SCF_TRCP1_1	32	37	p.S33C	1629204	pituitary	craniopharyngioma	22086512
P35222	DEG_SCF_TRCP1_1	32	37	p.S33C	876510	stomach	adenoma	11238048
P35222	DEG_SCF_TRCP1_1	32	37	p.S33C	1042750	pancreas	carcinoma	16967453
P35222	DEG_SCF_TRCP1_1	32	37	p.S33C	1752588	central_nervous_system	primitive_neuroectodermal_tumour-medulloblastoma	22832581
P35222	DEG_SCF_TRCP1_1	32	37	p.S33C	1752586	central_nervous_system	primitive_neuroectodermal_tumour-medulloblastoma	22832581
P35222	DEG_SCF_TRCP1_1	32	37	p.S33C	1184022	central_nervous_system	primitive_neuroectodermal_tumour-medulloblastoma	18769486
P35222	DEG_SCF_TRCP1_1	32	37	p.S33C	872401	kidney	Wilms_tumour	11103785
P35222	DEG_SCF_TRCP1_1	32	37	p.S33C	1191078	endometrium	carcinoma	19085831
P35222	DEG_SCF_TRCP1_1	32	37	p.S33C	875584	lung	carcinoma	12754743
P35222	DEG_SCF_TRCP1_1	32	37	p.S33C	1652924	central_nervous_system	primitive_neuroectodermal_tumour-medulloblastoma	22832583
P35222	DEG_SCF_TRCP1_1	32	37	p.S33C	869595	liver	carcinoma	11282485
P35222	DEG_SCF_TRCP1_1	32	37	p.S33C	909723	skin	malignant_melanoma
P35222	DEG_SCF_TRCP1_1	32	37	p.S33C	1669765	pancreas	carcinoma	21769465
P35222	DEG_SCF_TRCP1_1	32	37	p.S33C	1073418	liver	carcinoma	17187432
P35222	DEG_SCF_TRCP1_1	32	37	p.S33C	1063893	central_nervous_system	primitive_neuroectodermal_tumour-medulloblastoma	16685513
P35222	DEG_SCF_TRCP1_1	32	37	p.S33C	873765	skin	adnexal_tumour	12575848
P35222	DEG_SCF_TRCP1_1	32	37	p.S33C	1783483	endometrium	carcinoma
P35222	DEG_SCF_TRCP1_1	32	37	p.S33C	876518	stomach	adenoma	11238048
P35222	DEG_SCF_TRCP1_1	32	37	p.S33C	876520	stomach	adenoma	11238048
P35222	DEG_SCF_TRCP1_1	32	37	p.S33C	1472685	central_nervous_system	primitive_neuroectodermal_tumour-medulloblastoma	21060032
P35222	DEG_SCF_TRCP1_1	32	37	p.S33C	1176276	pituitary	craniopharyngioma	18540944
P35222	DEG_SCF_TRCP1_1	32	37	p.S33C	868191	endometrium	carcinoma	10076565
P35222	DEG_SCF_TRCP1_1	32	37	p.S33C	876314	endometrium	carcinoma	11161379
P35222	DEG_SCF_TRCP1_1	32	37	p.S33C	875917	ovary	carcinoma	11385321
P35222	DEG_SCF_TRCP1_1	32	37	p.S33C	1042396	ovary	low_malignant_potential_(borderline)_tumour	16429393
P35222	DEG_SCF_TRCP1_1	32	37	p.S33C	1783367	endometrium	carcinoma
P35222	DEG_SCF_TRCP1_1	32	37	p.S33C	715133	large_intestine	serrated_polyp	12117880
P35222	DEG_SCF_TRCP1_1	32	37	p.S33C	875462	bone	calcifying_odontogenic_cyst	14578169
P35222	DEG_SCF_TRCP1_1	32	37	p.S33C	910712	central_nervous_system	primitive_neuroectodermal_tumour-medulloblastoma	15176713
P35222	DEG_SCF_TRCP1_1	32	37	p.S33C	869330	biliary_tract	carcinoma	11309300
P35222	DEG_SCF_TRCP1_1	32	37	p.S33C	1042393	ovary	low_malignant_potential_(borderline)_tumour	16429393
P35222	DEG_SCF_TRCP1_1	32	37	p.S33C	870352	central_nervous_system	primitive_neuroectodermal_tumour-medulloblastoma	11433413
P35222	DEG_SCF_TRCP1_1	32	37	p.S33C	1753947	pituitary	craniopharyngioma	21562037
P35222	DEG_SCF_TRCP1_1	32	37	p.S33C	876511	stomach	adenoma	11238048
P35222	DEG_SCF_TRCP1_1	32	37	p.S33C	1839748	central_nervous_system	primitive_neuroectodermal_tumour-medulloblastoma	23278988
P35222	DEG_SCF_TRCP1_1	32	37	p.S33C	875255	ovary	carcinoma	11719457
P35222	DEG_SCF_TRCP1_1	32	37	p.S33C	1063894	central_nervous_system	primitive_neuroectodermal_tumour-medulloblastoma	16685513
P35222	DEG_SCF_TRCP1_1	32	37	p.S33C	1752623	central_nervous_system	primitive_neuroectodermal_tumour-medulloblastoma	22832581
P35222	DEG_SCF_TRCP1_1	32	37	p.S33C	979743	ovary	carcinoma	15668893
P35222	DEG_SCF_TRCP1_1	32	37	p.S33C	876319	endometrium	hyperplasia	11161379
P35222	DEG_SCF_TRCP1_1	32	37	p.S33C	1184164	central_nervous_system	primitive_neuroectodermal_tumour-medulloblastoma	16567768
P35222	DEG_SCF_TRCP1_1	32	37	p.S33C	874761	liver	carcinoma	12845670
P35222	DEG_SCF_TRCP1_1	32	37	p.S33C	870465	pancreas	carcinoma	11731417
P35222	DEG_SCF_TRCP1_1	32	37	p.S33C	1197904	central_nervous_system	primitive_neuroectodermal_tumour-medulloblastoma	19293793
P35222	DEG_SCF_TRCP1_1	32	37	p.S33C	1869519	endometrium	carcinoma	23028188
P35222	DEG_SCF_TRCP1_1	32	37	p.S33C	1127607	liver	carcinoma	18467159
P35222	DEG_SCF_TRCP1_1	32	37	p.S33C	1753946	pituitary	craniopharyngioma	21562037
P35222	DEG_SCF_TRCP1_1	32	37	p.S33C	1042151	pituitary	craniopharyngioma	15891929
P35222	DEG_SCF_TRCP1_1	32	37	p.S33C	1472676	central_nervous_system	primitive_neuroectodermal_tumour-medulloblastoma	21060032
P35222	DEG_SCF_TRCP1_1	32	37	p.S33C	1752615	central_nervous_system	primitive_neuroectodermal_tumour-medulloblastoma	22832581
P35222	DEG_SCF_TRCP1_1	32	37	p.S33C	1752612	central_nervous_system	primitive_neuroectodermal_tumour-medulloblastoma	22832581
P35222	DEG_SCF_TRCP1_1	32	37	p.S33C	1652849	central_nervous_system	primitive_neuroectodermal_tumour-medulloblastoma	22832583
P35222	DEG_SCF_TRCP1_1	32	37	p.S33C	1566735	liver	carcinoma
P35222	DEG_SCF_TRCP1_1	32	37	p.S33C	1127907	breast	carcinoma	18593979
P35222	DEG_SCF_TRCP1_1	32	37	p.S33C	871776	liver	carcinoma	10980116
P35222	DEG_SCF_TRCP1_1	32	37	p.S33C	1918825	liver	carcinoma
P35222	DEG_SCF_TRCP1_1	32	37	p.S33C	870466	pancreas	carcinoma	11731417
P35222	DEG_SCF_TRCP1_1	32	37	p.S33C	876514	stomach	adenoma	11238048
P35222	DEG_SCF_TRCP1_1	32	37	p.S33C	1652826	central_nervous_system	primitive_neuroectodermal_tumour-medulloblastoma	22832583
P35222	DEG_SCF_TRCP1_1	32	37	p.S33C	876516	stomach	adenoma	11238048
P35222	DEG_SCF_TRCP1_1	32	37	p.S33C	1783324	endometrium	carcinoma
P35222	DEG_SCF_TRCP1_1	32	37	p.S33C	868689	ovary	carcinoma	10417756
P35222	DEG_SCF_TRCP1_1	32	37	p.S33C	869471	biliary_tract	other	11196159
P35222	DEG_SCF_TRCP1_1	32	37	p.S33C	877602	endometrium	carcinoma	11329142
P35222	DEG_SCF_TRCP1_1	32	37	p.S33C	871777	liver	carcinoma	10980116
P35222	DEG_SCF_TRCP1_1	32	37	p.S33C	1127911	breast	carcinoma	18593979
P35222	DEG_SCF_TRCP1_1	32	37	p.S33C	1042232	pituitary	craniopharyngioma	15980970
P35222	DEG_SCF_TRCP1_1	32	37	p.S33C	1598002	central_nervous_system	primitive_neuroectodermal_tumour-medulloblastoma	20921458
P35222	DEG_SCF_TRCP1_1	32	37	p.S33C	1513000	central_nervous_system	primitive_neuroectodermal_tumour-medulloblastoma	21163964
P35222	DEG_SCF_TRCP1_1	32	37	p.S33C	1783433	endometrium	carcinoma
P35222	DEG_SCF_TRCP1_1	32	37	p.S33C	1127609	liver	carcinoma	18467159
P35222	DEG_SCF_TRCP1_1	32	37	p.S33C	1509107	central_nervous_system	primitive_neuroectodermal_tumour-medulloblastoma	21358093
P35222	DEG_SCF_TRCP1_1	32	37	p.S33C	875581	lung	carcinoma	12754743
P35222	DEG_SCF_TRCP1_1	32	37	p.S33C	869628	central_nervous_system	primitive_neuroectodermal_tumour-medulloblastoma	9500446
P35222	DEG_SCF_TRCP1_1	32	37	p.S33C	876512	stomach	adenoma	11238048
P35222	DEG_SCF_TRCP1_1	32	37	p.S33C	1691655	pancreas	carcinoma	22158988
P35222	DEG_SCF_TRCP1_1	32	37	p.S33C	1509114	central_nervous_system	primitive_neuroectodermal_tumour-medulloblastoma	21358093
P35222	DEG_SCF_TRCP1_1	32	37	p.S33C	1713809	liver	carcinoma	22561517
P35222	DEG_SCF_TRCP1_1	32	37	p.S33C	871804	liver	carcinoma	10980116
P35222	DEG_SCF_TRCP1_1	32	37	p.S33C	1237521	lung	carcinoma	19582367
P35222	DEG_SCF_TRCP1_1	32	37	p.S33C	1752618	central_nervous_system	primitive_neuroectodermal_tumour-medulloblastoma	22832581
P35222	DEG_SCF_TRCP1_1	32	37	p.S33C	1197391	NS	malignant_melanoma	19234609
P35222	DEG_SCF_TRCP1_1	32	37	p.S33C	1566739	liver	carcinoma
P35222	DEG_SCF_TRCP1_1	32	37	p.S33C	877486	liver	carcinoma	11429783
P35222	DEG_SCF_TRCP1_1	32	37	p.S33C	1753944	pituitary	craniopharyngioma	21562037
P35222	DEG_SCF_TRCP1_1	32	37	p.S33C	877640	ovary	carcinoma	11329142
P35222	DEG_SCF_TRCP1_1	32	37	p.S33C	1120983	endometrium	carcinoma	18500270
P35222	DEG_SCF_TRCP1_1	32	37	p.S33C	876519	stomach	adenoma	11238048
P35222	DEG_SCF_TRCP1_1	32	37	p.S33C	1120997	endometrium	carcinoma	18500270
P35222	DEG_SCF_TRCP1_1	32	37	p.S33C	876320	endometrium	hyperplasia	11161379
P35222	DEG_SCF_TRCP1_1	32	37	p.S33C	1197903	central_nervous_system	primitive_neuroectodermal_tumour-medulloblastoma	19293793
P35222	DEG_SCF_TRCP1_1	32	37	p.S33C	1890891	oesophagus	carcinoma	23525077
P35222	DEG_SCF_TRCP1_1	32	37	p.S33C	1713763	liver	carcinoma	22561517
P35222	DEG_SCF_TRCP1_1	32	37	p.S33C	1131739	ovary	carcinoma	17418409
P35222	DEG_SCF_TRCP1_1	32	37	p.S33C	1121016	endometrium	carcinoma	18500270
P35222	DEG_SCF_TRCP1_1	32	37	p.S33C	869441	soft_tissue	juvenile_angiofibroma	11238055
P35222	DEG_SCF_TRCP1_1	32	37	p.S33C	877717	liver	carcinoma	11375957
P35222	DEG_SCF_TRCP1_1	32	37	p.S33C	1042598	skin	adnexal_tumour	16378715
P35222	DEG_SCF_TRCP1_1	32	37	p.S33C	1073425	liver	carcinoma	17187432
P35222	DEG_SCF_TRCP1_1	32	37	p.S33C	1191077	endometrium	carcinoma	19085831
P35222	DEG_SCF_TRCP1_1	32	37	p.S33C	1041967	endometrium	hyperplasia	16160475
P35222	DEG_SCF_TRCP1_1	32	37	p.S33C	1131691	pancreas	carcinoma	17334348
P35222	DEG_SCF_TRCP1_1	32	37	p.S33C	1184019	central_nervous_system	primitive_neuroectodermal_tumour-medulloblastoma	18769486
P35222	DEG_SCF_TRCP1_1	32	37	p.S33C	874777	liver	carcinoma	12845670
P35222	DEG_SCF_TRCP1_1	32	37	p.S33C	1042133	pituitary	craniopharyngioma	15891929
P35222	DEG_SCF_TRCP1_1	32	37	p.S33C	875583	lung	carcinoma	12754743
P35222	DEG_SCF_TRCP1_1	32	37	p.S33C	1629125	parathyroid	adenoma	22095489
P35222	DEG_SCF_TRCP1_1	32	37	p.S33C	1713828	liver	carcinoma	22561517
P35222	DEG_SCF_TRCP1_1	32	37	p.S33C	1041025	liver	carcinoma	15288479
P35222	DEG_SCF_TRCP1_1	32	37	p.S33C	1713812	liver	carcinoma	22561517
P35222	DEG_SCF_TRCP1_1	32	37	p.S33C	875283	ovary	carcinoma	11719457
P35222	DEG_SCF_TRCP1_1	32	37	p.S33C	873043	liver	carcinoma	10597262
P35222	DEG_SCF_TRCP1_1	32	37	p.S33C	1889106	central_nervous_system	primitive_neuroectodermal_tumour-medulloblastoma	23525311
P35222	DEG_SCF_TRCP1_1	32	37	p.S33C	1127608	liver	carcinoma	18467159
P35222	DEG_SCF_TRCP1_1	32	37	p.S33C	1472674	central_nervous_system	primitive_neuroectodermal_tumour-medulloblastoma	21060032
P35222	DEG_SCF_TRCP1_1	32	37	p.S33C	1566799	liver	carcinoma	21822264
P35222	DEG_SCF_TRCP1_1	32	37	p.S33C	875918	ovary	carcinoma	11385321
P35222	DEG_SCF_TRCP1_1	32	37	p.S33C	1042148	pituitary	craniopharyngioma	15891929
P35222	DEG_SCF_TRCP1_1	32	37	p.S33C	868315	endometrium	carcinoma	10416591
P35222	DEG_SCF_TRCP1_1	32	37	p.S33C	1610898	central_nervous_system	primitive_neuroectodermal_tumour-medulloblastoma	12209999
P35222	DEG_SCF_TRCP1_1	32	37	p.S33C	878298	liver	carcinoma	12375019
P35222	DEG_SCF_TRCP1_1	32	37	p.S33C	1042765	pancreas	carcinoma	16967453
P35222	DEG_SCF_TRCP1_1	32	37	p.S33C	1513013	central_nervous_system	primitive_neuroectodermal_tumour-medulloblastoma	21163964
P35222	DEG_SCF_TRCP1_1	32	37	p.S33C	869453	soft_tissue	juvenile_angiofibroma	11238055
P35222	DEG_SCF_TRCP1_1	32	37	p.S33C	875582	lung	carcinoma	12754743
P35222	DEG_SCF_TRCP1_1	32	37	p.S33C	864369	liver	carcinoma	15067328
P35222	DEG_SCF_TRCP1_1	32	37	p.S33C	876517	stomach	adenoma	11238048
P35222	DEG_SCF_TRCP1_1	32	37	p.S33C	867869	ovary	carcinoma	10433945
P35222	DEG_SCF_TRCP1_1	32	37	p.S33C	1042106	bone	other	16109989
P35222	DEG_SCF_TRCP1_1	32	37	p.S33C	869596	liver	carcinoma	11282485
P35222	DEG_SCF_TRCP1_1	32	37	p.S33C	872538	prostate	carcinoma	11102958
P35222	DEG_SCF_TRCP1_1	32	37	p.S33C	1321363	pancreas	carcinoma	20180245
P35222	DEG_SCF_TRCP1_1	32	37	p.S33C	1620049	biliary_tract	carcinoma	16142313
P35222	DEG_SCF_TRCP1_1	32	37	p.S33C	1889107	central_nervous_system	primitive_neuroectodermal_tumour-medulloblastoma	23525311
P35222	DEG_SCF_TRCP1_1	32	37	p.S33C	1919199	liver	carcinoma
P35222	DEG_SCF_TRCP1_1	32	37	p.S33C	871466	liver	carcinoma	10700176
P35222	DEG_SCF_TRCP1_1	32	37	p.S33C	877550	endometrium	carcinoma	11329142
P35222	DEG_SCF_TRCP1_1	32	37	p.S33C	1629570	ovary	microcystic_stromal_tumour	21881488
P35222	DEG_SCF_TRCP1_1	32	37	p.S33C	875258	ovary	carcinoma	11719457
P35222	DEG_SCF_TRCP1_1	32	37	p.S33C	1127929	breast	carcinoma	18593979
P35222	DEG_SCF_TRCP1_1	32	37	p.S33C	1652980	liver	carcinoma
P35222	DEG_SCF_TRCP1_1	32	37	p.S33C	1042163	pituitary	craniopharyngioma	15891929
P35222	DEG_SCF_TRCP1_1	32	37	p.S33C	876513	stomach	adenoma	11238048
P35222	DEG_SCF_TRCP1_1	32	37	p.S33C	874774	liver	carcinoma	12845670
P35222	DEG_SCF_TRCP1_1	32	37	p.S33C	1184018	central_nervous_system	primitive_neuroectodermal_tumour-medulloblastoma	18769486
P35222	DEG_SCF_TRCP1_1	32	37	p.S33C	869445	soft_tissue	juvenile_angiofibroma	11238055
P35222	DEG_SCF_TRCP1_1	32	37	p.S33C	876515	stomach	adenoma	11238048
P35222	DEG_SCF_TRCP1_1	32	37	p.S33C	1652882	central_nervous_system	primitive_neuroectodermal_tumour-medulloblastoma	22832583
P35222	DEG_SCF_TRCP1_1	32	37	p.S33C	873656	stomach	adenoma	11956818
P35222	DEG_SCF_TRCP1_1	32	37	p.S33C	874900	pituitary	craniopharyngioma	12466115
P35222	DEG_SCF_TRCP1_1	32	37	p.S33C	1472679	central_nervous_system	primitive_neuroectodermal_tumour-medulloblastoma	21060032
P35222	DEG_SCF_TRCP1_1	32	37	p.S33C	864378	liver	carcinoma	15067328
P35222	DEG_SCF_TRCP1_1	32	37	p.S33C	1130538	liver	carcinoma	17510384
P35222	DEG_SCF_TRCP1_1	32	37	p.S33C	878418	stomach	adenoma	12414520
P35222	DEG_SCF_TRCP1_1	32	37	p.S33C	1189008	liver	carcinoma	19101982
P35222	DEG_SCF_TRCP1_1	32	37	p.S33C	878142	liver	other	12101426
P35222	DEG_SCF_TRCP1_1	32	37	p.S33C	1696148	parathyroid	adenoma	22576020
P35222	DEG_SCF_TRCP1_1	32	37	p.S33C	869444	soft_tissue	juvenile_angiofibroma	11238055
P35222	DEG_SCF_TRCP1_1	32	37	p.S33C	864376	liver	carcinoma	15067328
P35222	DEG_SCF_TRCP1_1	32	37	p.S33C	1513018	central_nervous_system	primitive_neuroectodermal_tumour-medulloblastoma	21163964
P35222	DEG_SCF_TRCP1_1	32	37	p.S33C	1189002	liver	carcinoma	19101982
P35222	DEG_SCF_TRCP1_1	32	37	p.D32A	1198270	liver	other	19200579
P35222	DEG_SCF_TRCP1_1	32	37	p.D32A	1198281	liver	other	19200579
P35222	DEG_SCF_TRCP1_1	32	37	p.S37P	1621777	adrenal_gland	adrenal_cortical_neoplasm	21849527
P35222	DEG_SCF_TRCP1_1	32	37	p.S37P	1198279	liver	other	19200579
P35222	DEG_SCF_TRCP1_1	32	37	p.G34R	1198288	liver	other	19200579
P35222	DEG_SCF_TRCP1_1	32	37	p.G34R	1622815	liver	other	22183980
P35222	DEG_SCF_TRCP1_1	32	37	p.G34R	1479468	central_nervous_system	primitive_neuroectodermal_tumour-medulloblastoma	21150899
P35222	DEG_SCF_TRCP1_1	32	37	p.G34R	1748157	endometrium	carcinoma	21470976
P35222	DEG_SCF_TRCP1_1	32	37	p.G34R	1589238	liver	other	19061838
P35222	DEG_SCF_TRCP1_1	32	37	p.G34R	1589215	liver	other	19061838
P35222	DEG_SCF_TRCP1_1	32	37	p.G34R	948871	pancreas	other	11696422
P35222	DEG_SCF_TRCP1_1	32	37	p.G34R	1198273	liver	other	19200579
P35222	DEG_SCF_TRCP1_1	32	37	p.G34R	1622601	liver	other	21992464
P35222	DEG_SCF_TRCP1_1	32	37	p.G34R	1191859	central_nervous_system	primitive_neuroectodermal_tumour-medulloblastoma	19197950
P35222	DEG_SCF_TRCP1_1	32	37	p.G34R	1719622	soft_tissue	desmoid_tumour-fibromatosis	22766794
P35222	DEG_SCF_TRCP1_1	32	37	p.G34R	1719620	soft_tissue	desmoid_tumour-fibromatosis	22766794
P35222	DEG_SCF_TRCP1_1	32	37	p.G34R	1479467	central_nervous_system	primitive_neuroectodermal_tumour-medulloblastoma	21150899
P35222	DEG_SCF_TRCP1_1	32	37	p.I35K	1173857	liver	other	16937357
P35222	DEG_SCF_TRCP1_1	32	37	p.D32N	873437	endometrium	carcinoma	12439748
P35222	DEG_SCF_TRCP1_1	32	37	p.D32N	870470	pancreas	carcinoma	11731417
P35222	DEG_SCF_TRCP1_1	32	37	p.D32N	1691661	pancreas	carcinoma	22158988
P35222	DEG_SCF_TRCP1_1	32	37	p.D32N	1173803	liver	carcinoma	18701503
P35222	DEG_SCF_TRCP1_1	32	37	p.D32N	1472669	central_nervous_system	primitive_neuroectodermal_tumour-medulloblastoma	21060032
P35222	DEG_SCF_TRCP1_1	32	37	p.D32N	1752617	central_nervous_system	primitive_neuroectodermal_tumour-medulloblastoma	22832581
P35222	DEG_SCF_TRCP1_1	32	37	p.D32N	869470	biliary_tract	other	11196159
P35222	DEG_SCF_TRCP1_1	32	37	p.D32N	738799	endometrium	carcinoma	12015762
P35222	DEG_SCF_TRCP1_1	32	37	p.D32N	1472663	central_nervous_system	primitive_neuroectodermal_tumour-medulloblastoma	21060032
P35222	DEG_SCF_TRCP1_1	32	37	p.D32N	1472670	central_nervous_system	primitive_neuroectodermal_tumour-medulloblastoma	21060032
P35222	DEG_SCF_TRCP1_1	32	37	p.D32N	1071846	central_nervous_system	primitive_neuroectodermal_tumour-medulloblastoma	17172831
P35222	DEG_SCF_TRCP1_1	32	37	p.D32N	1783318	endometrium	carcinoma
P35222	DEG_SCF_TRCP1_1	32	37	p.D32N	1472672	central_nervous_system	primitive_neuroectodermal_tumour-medulloblastoma	21060032
P35222	DEG_SCF_TRCP1_1	32	37	p.D32N	1598021	central_nervous_system	primitive_neuroectodermal_tumour-medulloblastoma	20921458
P35222	DEG_SCF_TRCP1_1	32	37	p.D32N	873741	endometrium	carcinoma	12708483
P35222	DEG_SCF_TRCP1_1	32	37	p.D32N	1173744	liver	carcinoma	18701503
P35222	DEG_SCF_TRCP1_1	32	37	p.D32N	873204	stomach	carcinoma	10485468
P35222	DEG_SCF_TRCP1_1	32	37	p.D32N	1063891	central_nervous_system	primitive_neuroectodermal_tumour-medulloblastoma	16685513
P35222	DEG_SCF_TRCP1_1	32	37	p.D32N	1173751	liver	carcinoma	18701503
P35222	DEG_SCF_TRCP1_1	32	37	p.D32N	1042803	pancreas	carcinoma	16523258
P35222	DEG_SCF_TRCP1_1	32	37	p.D32N	872209	liver	other	10698519
P35222	DEG_SCF_TRCP1_1	32	37	p.D32N	871530	endometrium	carcinoma	10671680
P35222	DEG_SCF_TRCP1_1	32	37	p.D32N	871770	liver	carcinoma	10980116
P35222	DEG_SCF_TRCP1_1	32	37	p.D32N	1127626	liver	carcinoma	18467159
P35222	DEG_SCF_TRCP1_1	32	37	p.D32N	1889099	central_nervous_system	primitive_neuroectodermal_tumour-medulloblastoma	23525311
P35222	DEG_SCF_TRCP1_1	32	37	p.D32N	1783460	endometrium	carcinoma
P35222	DEG_SCF_TRCP1_1	32	37	p.D32N	869193	liver	carcinoma	9635572
P35222	DEG_SCF_TRCP1_1	32	37	p.D32N	1472667	central_nervous_system	primitive_neuroectodermal_tumour-medulloblastoma	21060032
P35222	DEG_SCF_TRCP1_1	32	37	p.D32N	1472640	central_nervous_system	primitive_neuroectodermal_tumour-medulloblastoma	21060032
P35222	DEG_SCF_TRCP1_1	32	37	p.D32N	1707648	stomach	carcinoma	22723903
P35222	DEG_SCF_TRCP1_1	32	37	p.D32N	1041546	central_nervous_system	primitive_neuroectodermal_tumour-medulloblastoma	16258095
P35222	DEG_SCF_TRCP1_1	32	37	p.D32N	1042231	pituitary	craniopharyngioma	15980970
P35222	DEG_SCF_TRCP1_1	32	37	p.D32N	1752619	central_nervous_system	primitive_neuroectodermal_tumour-medulloblastoma	22832581
P35222	DEG_SCF_TRCP1_1	32	37	p.D32N	1629203	pituitary	craniopharyngioma	22086512
P35222	DEG_SCF_TRCP1_1	32	37	p.D32N	1509105	central_nervous_system	primitive_neuroectodermal_tumour-medulloblastoma	21358093
P35222	DEG_SCF_TRCP1_1	32	37	p.D32N	875453	bone	calcifying_odontogenic_cyst	14578169
P35222	DEG_SCF_TRCP1_1	32	37	p.D32N	870471	pancreas	carcinoma	11731417
P35222	DEG_SCF_TRCP1_1	32	37	p.D32N	868305	endometrium	carcinoma	10416591
P35222	DEG_SCF_TRCP1_1	32	37	p.D32N	869195	liver	carcinoma	9635572
P35222	DEG_SCF_TRCP1_1	32	37	p.D32N	1783531	endometrium	carcinoma
P35222	DEG_SCF_TRCP1_1	32	37	p.D32N	1472637	central_nervous_system	primitive_neuroectodermal_tumour-medulloblastoma	21060032
P35222	DEG_SCF_TRCP1_1	32	37	p.D32N	1919213	liver	carcinoma
P35222	DEG_SCF_TRCP1_1	32	37	p.D32N	878700	stomach	carcinoma	12067995
P35222	DEG_SCF_TRCP1_1	32	37	p.D32N	1598010	central_nervous_system	primitive_neuroectodermal_tumour-medulloblastoma	20921458
P35222	DEG_SCF_TRCP1_1	32	37	p.D32N	738793	pancreas	carcinoma	11943721
P35222	DEG_SCF_TRCP1_1	32	37	p.D32N	870321	stomach	carcinoma	11756228
P35222	DEG_SCF_TRCP1_1	32	37	p.D32N	872838	liver	carcinoma	10665646
P35222	DEG_SCF_TRCP1_1	32	37	p.D32N	1042147	pituitary	craniopharyngioma	15891929
P35222	DEG_SCF_TRCP1_1	32	37	p.D32N	874479	pituitary	craniopharyngioma	15221941
P35222	DEG_SCF_TRCP1_1	32	37	p.D32N	1184161	central_nervous_system	primitive_neuroectodermal_tumour-medulloblastoma	16567768
P35222	DEG_SCF_TRCP1_1	32	37	p.D32N	871772	liver	carcinoma	10980116
P35222	DEG_SCF_TRCP1_1	32	37	p.D32N	1752574	central_nervous_system	primitive_neuroectodermal_tumour-medulloblastoma	22832581
P35222	DEG_SCF_TRCP1_1	32	37	p.D32N	1752572	central_nervous_system	primitive_neuroectodermal_tumour-medulloblastoma	22832581
P35222	DEG_SCF_TRCP1_1	32	37	p.D32N	1752571	central_nervous_system	primitive_neuroectodermal_tumour-medulloblastoma	22832581
P35222	DEG_SCF_TRCP1_1	32	37	p.D32N	1783388	endometrium	carcinoma
P35222	DEG_SCF_TRCP1_1	32	37	p.D32N	874771	liver	carcinoma	12845670
P35222	DEG_SCF_TRCP1_1	32	37	p.D32N	1509110	central_nervous_system	primitive_neuroectodermal_tumour-medulloblastoma	21358093
P35222	DEG_SCF_TRCP1_1	32	37	p.D32N	872539	prostate	carcinoma	11102958
P35222	DEG_SCF_TRCP1_1	32	37	p.D32N	874776	liver	carcinoma	12845670
P35222	DEG_SCF_TRCP1_1	32	37	p.D32N	1783442	endometrium	carcinoma
P35222	DEG_SCF_TRCP1_1	32	37	p.D32N	1669763	pancreas	carcinoma	21769465
P35222	DEG_SCF_TRCP1_1	32	37	p.D32N	1707673	stomach	carcinoma	22723903
P35222	DEG_SCF_TRCP1_1	32	37	p.D32N	1889098	central_nervous_system	primitive_neuroectodermal_tumour-medulloblastoma	23525311
P35222	DEG_SCF_TRCP1_1	32	37	p.D32N	1752564	central_nervous_system	primitive_neuroectodermal_tumour-medulloblastoma	22832581
P35222	DEG_SCF_TRCP1_1	32	37	p.D32N	868310	endometrium	carcinoma	10416591
P35222	DEG_SCF_TRCP1_1	32	37	p.D32N	1918822	liver	carcinoma
P35222	DEG_SCF_TRCP1_1	32	37	p.D32N	1127627	liver	carcinoma	18467159
P35222	DEG_SCF_TRCP1_1	32	37	p.D32N	1669777	pancreas	carcinoma	21769465
P35222	DEG_SCF_TRCP1_1	32	37	p.D32N	872905	liver	carcinoma	10595907
P35222	DEG_SCF_TRCP1_1	32	37	p.D32N	876419	skin	adnexal_tumour	11472567
P35222	DEG_SCF_TRCP1_1	32	37	p.D32N	1783362	endometrium	carcinoma
P35222	DEG_SCF_TRCP1_1	32	37	p.D32N	871771	liver	carcinoma	10980116
P35222	DEG_SCF_TRCP1_1	32	37	p.D32N	870472	pancreas	carcinoma	11731417
P35222	DEG_SCF_TRCP1_1	32	37	p.D32N	1472681	central_nervous_system	primitive_neuroectodermal_tumour-medulloblastoma	21060032
P35222	DEG_SCF_TRCP1_1	32	37	p.D32N	1042149	pituitary	craniopharyngioma	15891929
P35222	DEG_SCF_TRCP1_1	32	37	p.S37T	876729	cervix	in_situ_neoplasm	11520139
P35222	DEG_SCF_TRCP1_1	32	37	p.D32N	873689	stomach	adenoma	11956818
P35222	DEG_SCF_TRCP1_1	32	37	p.D32N	1752578	central_nervous_system	primitive_neuroectodermal_tumour-medulloblastoma	22832581
P35222	DEG_SCF_TRCP1_1	32	37	p.D32N	875348	large_intestine	carcinoma	12912937
P35222	DEG_SCF_TRCP1_1	32	37	p.D32N	738783	pancreas	carcinoma	11943721
P35222	DEG_SCF_TRCP1_1	32	37	p.D32N	876005	stomach	carcinoma	11163116
P35222	DEG_SCF_TRCP1_1	32	37	p.D32N	1669771	pancreas	carcinoma	21769465
P35222	DEG_SCF_TRCP1_1	32	37	p.D32N	1174113	pituitary	craniopharyngioma	18540944
P35222	DEG_SCF_TRCP1_1	32	37	p.D32N	1472638	central_nervous_system	primitive_neuroectodermal_tumour-medulloblastoma	21060032
P35222	DEG_SCF_TRCP1_1	32	37	p.D32N	1629200	pituitary	craniopharyngioma	22086512
P35222	DEG_SCF_TRCP1_1	32	37	p.D32N	1752600	central_nervous_system	primitive_neuroectodermal_tumour-medulloblastoma	22832581
P35222	DEG_SCF_TRCP1_1	32	37	p.D32N	1669768	pancreas	carcinoma	21769465
P35222	DEG_SCF_TRCP1_1	32	37	p.D32N	869194	liver	carcinoma	9635572
P35222	DEG_SCF_TRCP1_1	32	37	p.S37Y	1646822	lung	carcinoma	22327622
P35222	DEG_SCF_TRCP1_1	32	37	p.S37Y	1622596	liver	other	21992464
P35222	DEG_SCF_TRCP1_1	32	37	p.S37Y	1589197	liver	other	19061838
P35222	DEG_SCF_TRCP1_1	32	37	p.D32N	1589192	liver	other	19061838
P35222	DEG_SCF_TRCP1_1	32	37	p.D32N	1622598	liver	other	21992464
P35222	DEG_SCF_TRCP1_1	32	37	p.D32N	1622604	liver	other	21992464
P35222	DEG_SCF_TRCP1_1	32	37	p.D32N	1622811	liver	other	22183980
P35222	DEG_SCF_TRCP1_1	32	37	p.S33T	1127930	breast	carcinoma	18593979
P35222	DEG_SCF_TRCP1_1	32	37	p.D32N	1741421	oesophagus	carcinoma	22870241
P35222	DEG_SCF_TRCP1_1	32	37	p.S33Y	1598022	central_nervous_system	primitive_neuroectodermal_tumour-medulloblastoma	20921458
P35222	DEG_SCF_TRCP1_1	32	37	p.S33Y	1172561	haematopoietic_and_lymphoid_tissue	lymphoid_neoplasm	18757411
P35222	DEG_SCF_TRCP1_1	32	37	p.S33Y	1075187	large_intestine	carcinoma	17183069
P35222	DEG_SCF_TRCP1_1	32	37	p.S33Y	870450	large_intestine	carcinoma	9065402
P35222	DEG_SCF_TRCP1_1	32	37	p.S33Y	1042499	liver	other	16496320
P35222	DEG_SCF_TRCP1_1	32	37	p.S33Y	869792	large_intestine	carcinoma	9515795
P35222	DEG_SCF_TRCP1_1	32	37	p.S33Y	1889104	central_nervous_system	primitive_neuroectodermal_tumour-medulloblastoma	23525311
P35222	DEG_SCF_TRCP1_1	32	37	p.S33Y	876645	large_intestine	carcinoma	11920497
P35222	DEG_SCF_TRCP1_1	32	37	p.S33Y	1889101	central_nervous_system	primitive_neuroectodermal_tumour-medulloblastoma	23525311
P35222	DEG_SCF_TRCP1_1	32	37	p.S33Y	1918889	liver	carcinoma
P35222	DEG_SCF_TRCP1_1	32	37	p.S33Y	1783396	endometrium	carcinoma
P35222	DEG_SCF_TRCP1_1	32	37	p.S33Y	1889103	central_nervous_system	primitive_neuroectodermal_tumour-medulloblastoma	23525311
P35222	DEG_SCF_TRCP1_1	32	37	p.S33Y	1071840	central_nervous_system	primitive_neuroectodermal_tumour-medulloblastoma	17172831
P35222	DEG_SCF_TRCP1_1	32	37	p.S33Y	876523	stomach	adenoma	11238048
P35222	DEG_SCF_TRCP1_1	32	37	p.S33Y	1889105	central_nervous_system	primitive_neuroectodermal_tumour-medulloblastoma	23525311
P35222	DEG_SCF_TRCP1_1	32	37	p.S33Y	1076742	large_intestine	carcinoma	17011185
P35222	DEG_SCF_TRCP1_1	32	37	p.S33Y	874780	liver	carcinoma	12845670
P35222	DEG_SCF_TRCP1_1	32	37	p.S33Y	1783386	endometrium	carcinoma
P35222	DEG_SCF_TRCP1_1	32	37	p.S33Y	1752622	central_nervous_system	primitive_neuroectodermal_tumour-medulloblastoma	22832581
P35222	DEG_SCF_TRCP1_1	32	37	p.S33Y	1075208	large_intestine	carcinoma	17183069
P35222	DEG_SCF_TRCP1_1	32	37	p.S33Y	1126555	bone	carcinoma	18377586
P35222	DEG_SCF_TRCP1_1	32	37	p.S33Y	873682	stomach	adenoma	11956818
P35222	DEG_SCF_TRCP1_1	32	37	p.S33Y	868676	skin	adnexal_tumour	10192393
P35222	DEG_SCF_TRCP1_1	32	37	p.S33Y	876318	endometrium	hyperplasia	11161379
P35222	DEG_SCF_TRCP1_1	32	37	p.S33Y	876522	stomach	adenoma	11238048
P35222	DEG_SCF_TRCP1_1	32	37	p.S33Y	868677	skin	adnexal_tumour	10192393
P35222	DEG_SCF_TRCP1_1	32	37	p.S33Y	1732872	central_nervous_system	primitive_neuroectodermal_tumour-medulloblastoma	22722829
P35222	DEG_SCF_TRCP1_1	32	37	p.S33Y	876707	large_intestine	carcinoma	9294210
P35222	DEG_SCF_TRCP1_1	32	37	p.S33Y	1512981	central_nervous_system	primitive_neuroectodermal_tumour-medulloblastoma	21163964
P35222	DEG_SCF_TRCP1_1	32	37	p.S33Y	876421	skin	adnexal_tumour	11472567
P35222	DEG_SCF_TRCP1_1	32	37	p.S33Y	1075172	large_intestine	carcinoma	17183069
P35222	DEG_SCF_TRCP1_1	32	37	p.S33Y	1076757	large_intestine	carcinoma	17011185
P35222	DEG_SCF_TRCP1_1	32	37	p.S33Y	873705	large_intestine	carcinoma	12460462
P35222	DEG_SCF_TRCP1_1	32	37	p.S33Y	1919170	liver	carcinoma
P35222	DEG_SCF_TRCP1_1	32	37	p.S33Y	874779	liver	carcinoma	12845670
P35222	DEG_SCF_TRCP1_1	32	37	p.S33Y	1783353	endometrium	carcinoma
P35222	DEG_SCF_TRCP1_1	32	37	p.S33Y	909751	large_intestine	carcinoma
P35222	DEG_SCF_TRCP1_1	32	37	p.S33Y	864370	liver	carcinoma	15067328
P35222	DEG_SCF_TRCP1_1	32	37	p.S33Y	1073431	liver	carcinoma	17187432
P35222	DEG_SCF_TRCP1_1	32	37	p.S33Y	875907	endometrium	carcinoma	11385321
P35222	DEG_SCF_TRCP1_1	32	37	p.S33Y	874763	liver	carcinoma	12845670
P35222	DEG_SCF_TRCP1_1	32	37	p.S33Y	871542	endometrium	carcinoma	10671680
P35222	DEG_SCF_TRCP1_1	32	37	p.S33Y	910785	large_intestine	carcinoma	15573917
P35222	DEG_SCF_TRCP1_1	32	37	p.S33Y	875259	ovary	carcinoma	11719457
P35222	DEG_SCF_TRCP1_1	32	37	p.S33Y	1063898	central_nervous_system	primitive_neuroectodermal_tumour-medulloblastoma	16685513
P35222	DEG_SCF_TRCP1_1	32	37	p.S33Y	1735477	central_nervous_system	primitive_neuroectodermal_tumour-medulloblastoma	22820256
P35222	DEG_SCF_TRCP1_1	32	37	p.S33Y	1075203	large_intestine	carcinoma	17183069
P35222	DEG_SCF_TRCP1_1	32	37	p.S33Y	1509115	central_nervous_system	primitive_neuroectodermal_tumour-medulloblastoma	21358093
P35222	DEG_SCF_TRCP1_1	32	37	p.S33Y	1076741	large_intestine	carcinoma	17011185
P35222	DEG_SCF_TRCP1_1	32	37	p.S33Y	1783502	endometrium	carcinoma
P35222	DEG_SCF_TRCP1_1	32	37	p.S33Y	1184017	central_nervous_system	primitive_neuroectodermal_tumour-medulloblastoma	18769486
P35222	DEG_SCF_TRCP1_1	32	37	p.S33Y	1184165	central_nervous_system	primitive_neuroectodermal_tumour-medulloblastoma	16567768
P35222	DEG_SCF_TRCP1_1	32	37	p.S33Y	1076756	large_intestine	carcinoma	17011185
P35222	DEG_SCF_TRCP1_1	32	37	p.S33Y	1472677	central_nervous_system	primitive_neuroectodermal_tumour-medulloblastoma	21060032
P35222	DEG_SCF_TRCP1_1	32	37	p.S33Y	1041548	central_nervous_system	primitive_neuroectodermal_tumour-medulloblastoma	16258095
P35222	DEG_SCF_TRCP1_1	32	37	p.S33Y	1598009	central_nervous_system	primitive_neuroectodermal_tumour-medulloblastoma	20921458
P35222	DEG_SCF_TRCP1_1	32	37	p.S33Y	1075189	large_intestine	carcinoma	17183069
P35222	DEG_SCF_TRCP1_1	32	37	p.S33Y	1752596	central_nervous_system	primitive_neuroectodermal_tumour-medulloblastoma	22832581
P35222	DEG_SCF_TRCP1_1	32	37	p.S33Y	878048	liver	carcinoma	12101426
P35222	DEG_SCF_TRCP1_1	32	37	p.S33Y	873444	endometrium	carcinoma	12439748
P35222	DEG_SCF_TRCP1_1	32	37	p.S33Y	1173864	liver	other	16937357
P35222	DEG_SCF_TRCP1_1	32	37	p.S33Y	876521	stomach	adenoma	11238048
P35222	DEG_SCF_TRCP1_1	32	37	p.S33Y	1042230	pituitary	craniopharyngioma	15980970
P35222	DEG_SCF_TRCP1_1	32	37	p.S33Y	872889	liver	carcinoma	10595907
P35222	DEG_SCF_TRCP1_1	32	37	p.S33Y	1076740	large_intestine	carcinoma	17011185
P35222	DEG_SCF_TRCP1_1	32	37	p.S33Y	1889102	central_nervous_system	primitive_neuroectodermal_tumour-medulloblastoma	23525311
P35222	DEG_SCF_TRCP1_1	32	37	p.S33Y	1075175	large_intestine	carcinoma	17183069
P35222	DEG_SCF_TRCP1_1	32	37	p.S33Y	877296	large_intestine	carcinoma	11107173
P35222	DEG_SCF_TRCP1_1	32	37	p.D32Y	868672	skin	adnexal_tumour	10192393
P35222	DEG_SCF_TRCP1_1	32	37	p.D32Y	874484	pituitary	craniopharyngioma	15221941
P35222	DEG_SCF_TRCP1_1	32	37	p.D32Y	1472665	central_nervous_system	primitive_neuroectodermal_tumour-medulloblastoma	21060032
P35222	DEG_SCF_TRCP1_1	32	37	p.D32Y	1120980	endometrium	carcinoma	18500270
P35222	DEG_SCF_TRCP1_1	32	37	p.D32Y	875263	ovary	carcinoma	11719457
P35222	DEG_SCF_TRCP1_1	32	37	p.D32Y	868321	endometrium	carcinoma	10416591
P35222	DEG_SCF_TRCP1_1	32	37	p.D32Y	1669752	pancreas	carcinoma	21769465
P35222	DEG_SCF_TRCP1_1	32	37	p.D32Y	1321367	pancreas	carcinoma	20180245
P35222	DEG_SCF_TRCP1_1	32	37	p.D32Y	875916	ovary	carcinoma	11385321
P35222	DEG_SCF_TRCP1_1	32	37	p.D32Y	1173867	liver	other	16937357
P35222	DEG_SCF_TRCP1_1	32	37	p.D32Y	1041544	central_nervous_system	primitive_neuroectodermal_tumour-medulloblastoma	16258095
P35222	DEG_SCF_TRCP1_1	32	37	p.D32Y	868057	liver	carcinoma	11375957
P35222	DEG_SCF_TRCP1_1	32	37	p.D32Y	1598003	central_nervous_system	primitive_neuroectodermal_tumour-medulloblastoma	20921458
P35222	DEG_SCF_TRCP1_1	32	37	p.D32Y	1918817	liver	carcinoma
P35222	DEG_SCF_TRCP1_1	32	37	p.D32Y	1126556	liver	carcinoma	17531558
P35222	DEG_SCF_TRCP1_1	32	37	p.D32Y	871234	central_nervous_system	primitive_neuroectodermal_tumour-medulloblastoma	10759189
P35222	DEG_SCF_TRCP1_1	32	37	p.D32Y	1598007	central_nervous_system	primitive_neuroectodermal_tumour-medulloblastoma	20921458
P35222	DEG_SCF_TRCP1_1	32	37	p.D32Y	870765	soft_tissue	synovial_sarcoma	11054718
P35222	DEG_SCF_TRCP1_1	32	37	p.D32Y	871803	liver	carcinoma	10980116
P35222	DEG_SCF_TRCP1_1	32	37	p.D32Y	875579	lung	carcinoma	12754743
P35222	DEG_SCF_TRCP1_1	32	37	p.D32Y	1889100	central_nervous_system	primitive_neuroectodermal_tumour-medulloblastoma	23525311
P35222	DEG_SCF_TRCP1_1	32	37	p.D32Y	1566805	liver	carcinoma	21822264
P35222	DEG_SCF_TRCP1_1	32	37	p.D32Y	1434218	endometrium	carcinoma	18552176
P35222	DEG_SCF_TRCP1_1	32	37	p.D32Y	870791	endometrium	carcinoma	11048799
P35222	DEG_SCF_TRCP1_1	32	37	p.D32Y	869268	liver	other	9927029
P35222	DEG_SCF_TRCP1_1	32	37	p.D32Y	1321372	pancreas	carcinoma	20180245
P35222	DEG_SCF_TRCP1_1	32	37	p.D32Y	1513007	central_nervous_system	primitive_neuroectodermal_tumour-medulloblastoma	21163964
P35222	DEG_SCF_TRCP1_1	32	37	p.D32Y	1752566	central_nervous_system	primitive_neuroectodermal_tumour-medulloblastoma	22832581
P35222	DEG_SCF_TRCP1_1	32	37	p.D32Y	1042391	ovary	low_malignant_potential_(borderline)_tumour	16429393
P35222	DEG_SCF_TRCP1_1	32	37	p.D32Y	1752616	central_nervous_system	primitive_neuroectodermal_tumour-medulloblastoma	22832581
P35222	DEG_SCF_TRCP1_1	32	37	p.D32Y	870343	skin	adnexal_tumour	11703283
P35222	DEG_SCF_TRCP1_1	32	37	p.D32Y	873733	endometrium	carcinoma	12708483
P35222	DEG_SCF_TRCP1_1	32	37	p.D32Y	891778	endometrium	carcinoma	11329142
P35222	DEG_SCF_TRCP1_1	32	37	p.D32Y	877485	liver	carcinoma	11429783
P35222	DEG_SCF_TRCP1_1	32	37	p.D32Y	870342	skin	adnexal_tumour	11703283
P35222	DEG_SCF_TRCP1_1	32	37	p.D32Y	877554	endometrium	carcinoma	11329142
P35222	DEG_SCF_TRCP1_1	32	37	p.D32Y	873690	stomach	adenoma	11956818
P35222	DEG_SCF_TRCP1_1	32	37	p.D32Y	875457	bone	calcifying_odontogenic_cyst	14578169
P35222	DEG_SCF_TRCP1_1	32	37	p.D32Y	870763	soft_tissue	synovial_sarcoma	11054718
P35222	DEG_SCF_TRCP1_1	32	37	p.D32Y	870794	endometrium	carcinoma	11048799
P35222	DEG_SCF_TRCP1_1	32	37	p.D32Y	1173852	liver	other	16937357
P35222	DEG_SCF_TRCP1_1	32	37	p.D32Y	869269	liver	other	9927029
P35222	DEG_SCF_TRCP1_1	32	37	p.D32Y	1071839	central_nervous_system	primitive_neuroectodermal_tumour-medulloblastoma	17172831
P35222	DEG_SCF_TRCP1_1	32	37	p.D32Y	1042605	skin	adnexal_tumour	16378715
P35222	DEG_SCF_TRCP1_1	32	37	p.D32Y	979746	ovary	carcinoma	15668893
P35222	DEG_SCF_TRCP1_1	32	37	p.D32Y	1689690	prostate	carcinoma	22722839
P35222	DEG_SCF_TRCP1_1	32	37	p.D32Y	871800	liver	carcinoma	10980116
P35222	DEG_SCF_TRCP1_1	32	37	p.D32Y	870764	soft_tissue	synovial_sarcoma	11054718
P35222	DEG_SCF_TRCP1_1	32	37	p.D32Y	1063892	central_nervous_system	primitive_neuroectodermal_tumour-medulloblastoma	16685513
P35222	DEG_SCF_TRCP1_1	32	37	p.D32Y	1752584	central_nervous_system	primitive_neuroectodermal_tumour-medulloblastoma	22832581
P35222	DEG_SCF_TRCP1_1	32	37	p.D32Y	877567	endometrium	carcinoma	11329142
P35222	DEG_SCF_TRCP1_1	32	37	p.D32Y	873681	stomach	adenoma	11956818
P35222	DEG_SCF_TRCP1_1	32	37	p.D32Y	1131771	ovary	carcinoma	17418409
P35222	DEG_SCF_TRCP1_1	32	37	p.D32Y	1041543	central_nervous_system	primitive_neuroectodermal_tumour-medulloblastoma	16258095
P35222	DEG_SCF_TRCP1_1	32	37	p.D32Y	1173855	liver	other	16937357
P35222	DEG_SCF_TRCP1_1	32	37	p.D32Y	1173755	liver	carcinoma	18701503
P35222	DEG_SCF_TRCP1_1	32	37	p.D32Y	877595	endometrium	carcinoma	11329142
P35222	DEG_SCF_TRCP1_1	32	37	p.D32Y	1965383	skin	adnexal_tumour	23629955
P35222	DEG_SCF_TRCP1_1	32	37	p.D32Y	867868	ovary	carcinoma	10433945
P35222	DEG_SCF_TRCP1_1	32	37	p.D32Y	1669764	pancreas	carcinoma	21769465
P35222	DEG_SCF_TRCP1_1	32	37	p.D32Y	1597997	central_nervous_system	primitive_neuroectodermal_tumour-medulloblastoma	20921458
P35222	DEG_SCF_TRCP1_1	32	37	p.D32Y	867867	ovary	carcinoma	10433945
P35222	DEG_SCF_TRCP1_1	32	37	p.D32Y	1839747	central_nervous_system	primitive_neuroectodermal_tumour-medulloblastoma	23278988
P35222	DEG_SCF_TRCP1_1	32	37	p.D32Y	870341	skin	adnexal_tumour	11703283
P35222	DEG_SCF_TRCP1_1	32	37	p.D32Y	1783320	endometrium	carcinoma
P35222	DEG_SCF_TRCP1_1	32	37	p.D32Y	871801	liver	carcinoma	10980116
P35222	DEG_SCF_TRCP1_1	32	37	p.D32Y	867684	endometrium	carcinoma	11957146
P35222	DEG_SCF_TRCP1_1	32	37	p.D32Y	873667	stomach	adenoma	11956818
P35222	DEG_SCF_TRCP1_1	32	37	p.D32Y	1127629	liver	carcinoma	18467159
P35222	DEG_SCF_TRCP1_1	32	37	p.D32Y	1783535	endometrium	carcinoma
P35222	DEG_SCF_TRCP1_1	32	37	p.D32Y	869163	liver	carcinoma	9671767
P35222	DEG_SCF_TRCP1_1	32	37	p.D32Y	1071817	central_nervous_system	primitive_neuroectodermal_tumour-medulloblastoma	17172831
P35222	DEG_SCF_TRCP1_1	32	37	p.D32Y	1197902	central_nervous_system	primitive_neuroectodermal_tumour-medulloblastoma	19293793
P35222	DEG_SCF_TRCP1_1	32	37	p.D32Y	1783445	endometrium	carcinoma
P35222	DEG_SCF_TRCP1_1	32	37	p.D32Y	873674	stomach	adenoma	11956818
P35222	DEG_SCF_TRCP1_1	32	37	p.D32Y	878699	stomach	carcinoma	12067995
P35222	DEG_SCF_TRCP1_1	32	37	p.D32Y	738790	pancreas	carcinoma	11943721
P35222	DEG_SCF_TRCP1_1	32	37	p.D32Y	1042603	skin	adnexal_tumour	16378715
P35222	DEG_SCF_TRCP1_1	32	37	p.D32Y	1752602	central_nervous_system	primitive_neuroectodermal_tumour-medulloblastoma	22832581
P35222	DEG_SCF_TRCP1_1	32	37	p.D32Y	873739	endometrium	carcinoma	12708483
P35222	DEG_SCF_TRCP1_1	32	37	p.D32Y	1652927	central_nervous_system	primitive_neuroectodermal_tumour-medulloblastoma	22832583
P35222	DEG_SCF_TRCP1_1	32	37	p.D32Y	871773	liver	carcinoma	10980116
P35222	DEG_SCF_TRCP1_1	32	37	p.D32Y	1184020	central_nervous_system	primitive_neuroectodermal_tumour-medulloblastoma	18769486
P35222	DEG_SCF_TRCP1_1	32	37	p.D32Y	1752581	central_nervous_system	primitive_neuroectodermal_tumour-medulloblastoma	22832581
P35222	DEG_SCF_TRCP1_1	32	37	p.D32Y	868322	endometrium	hyperplasia	10416591
P35222	DEG_SCF_TRCP1_1	32	37	p.D32Y	1511930	urinary_tract	carcinoma	21533174
P35222	DEG_SCF_TRCP1_1	32	37	p.D32Y	1752606	central_nervous_system	primitive_neuroectodermal_tumour-medulloblastoma	22832581
P35222	DEG_SCF_TRCP1_1	32	37	p.D32Y	891784	endometrium	carcinoma	11329142
P35222	DEG_SCF_TRCP1_1	32	37	p.D32Y	873663	stomach	adenoma	11956818
P35222	DEG_SCF_TRCP1_1	32	37	p.D32Y	1783395	endometrium	carcinoma
P35222	DEG_SCF_TRCP1_1	32	37	p.D32Y	1752603	central_nervous_system	primitive_neuroectodermal_tumour-medulloblastoma	22832581
P35222	DEG_SCF_TRCP1_1	32	37	p.D32Y	873685	stomach	adenoma	11956818
P35222	DEG_SCF_TRCP1_1	32	37	p.D32Y	873676	stomach	adenoma	11956818
P35222	DEG_SCF_TRCP1_1	32	37	p.D32Y	1652895	central_nervous_system	primitive_neuroectodermal_tumour-medulloblastoma	22832583
P35222	DEG_SCF_TRCP1_1	32	37	p.D32Y	869054	prostate	carcinoma	9635571
P35222	DEG_SCF_TRCP1_1	32	37	p.D32Y	869197	liver	carcinoma	9635572
P35222	DEG_SCF_TRCP1_1	32	37	p.D32Y	1042810	pancreas	carcinoma	16523258
P35222	DEG_SCF_TRCP1_1	32	37	p.D32Y	1173870	liver	other	16937357
P35222	DEG_SCF_TRCP1_1	32	37	p.D32Y	738791	pancreas	carcinoma	11943721
P35222	DEG_SCF_TRCP1_1	32	37	p.D32Y	1669753	pancreas	carcinoma	21769465
P35222	DEG_SCF_TRCP1_1	32	37	p.D32Y	1321370	pancreas	carcinoma	20180245
P35222	DEG_SCF_TRCP1_1	32	37	p.D32Y	1041971	endometrium	hyperplasia	16160475
P35222	DEG_SCF_TRCP1_1	32	37	p.D32Y	1214216	pituitary	craniopharyngioma	19384065
P35222	DEG_SCF_TRCP1_1	32	37	p.D32Y	1041545	central_nervous_system	primitive_neuroectodermal_tumour-medulloblastoma	16258095
P35222	DEG_SCF_TRCP1_1	32	37	p.D32Y	873052	liver	carcinoma	10597262
P35222	DEG_SCF_TRCP1_1	32	37	p.D32Y	1752620	central_nervous_system	primitive_neuroectodermal_tumour-medulloblastoma	22832581
P35222	DEG_SCF_TRCP1_1	32	37	p.D32Y	1127628	liver	carcinoma	18467159
P35222	DEG_SCF_TRCP1_1	32	37	p.D32Y	876507	stomach	adenoma	11238048
P35222	DEG_SCF_TRCP1_1	32	37	p.D32Y	1042802	pancreas	carcinoma	16523258
P35222	DEG_SCF_TRCP1_1	32	37	p.D32Y	1652936	central_nervous_system	primitive_neuroectodermal_tumour-medulloblastoma	22832583
P35222	DEG_SCF_TRCP1_1	32	37	p.D32Y	1071841	central_nervous_system	primitive_neuroectodermal_tumour-medulloblastoma	17172831
P35222	DEG_SCF_TRCP1_1	32	37	p.D32Y	738774	pancreas	carcinoma	11943721
P35222	DEG_SCF_TRCP1_1	32	37	p.D32Y	1918848	liver	carcinoma
P35222	DEG_SCF_TRCP1_1	32	37	p.D32Y	1071844	central_nervous_system	primitive_neuroectodermal_tumour-medulloblastoma	17172831
P35222	DEG_SCF_TRCP1_1	32	37	p.D32Y	1669769	pancreas	carcinoma	21769465
P35222	DEG_SCF_TRCP1_1	32	37	p.D32Y	876508	stomach	adenoma	11238048
P35222	DEG_SCF_TRCP1_1	32	37	p.D32Y	868320	endometrium	carcinoma	10416591
P35222	DEG_SCF_TRCP1_1	32	37	p.D32Y	873736	endometrium	carcinoma	12708483
P35222	DEG_SCF_TRCP1_1	32	37	p.D32Y	1752569	central_nervous_system	primitive_neuroectodermal_tumour-medulloblastoma	22832581
P35222	DEG_SCF_TRCP1_1	32	37	p.D32Y	873673	stomach	adenoma	11956818
P35222	DEG_SCF_TRCP1_1	32	37	p.D32Y	873145	large_intestine	carcinoma	10493496
P35222	DEG_SCF_TRCP1_1	32	37	p.D32Y	1214175	skin	adnexal_tumour	19384065
P35222	DEG_SCF_TRCP1_1	32	37	p.D32Y	874482	pituitary	craniopharyngioma	15221941
P35222	DEG_SCF_TRCP1_1	32	37	p.D32Y	869196	liver	carcinoma	9635572
P35222	DEG_SCF_TRCP1_1	32	37	p.D32Y	873732	endometrium	carcinoma	12708483
P35222	DEG_SCF_TRCP1_1	32	37	p.D32Y	1041970	endometrium	hyperplasia	16160475
P35222	DEG_SCF_TRCP1_1	32	37	p.D32Y	872898	liver	carcinoma	10595907
P35222	DEG_SCF_TRCP1_1	32	37	p.D32Y	867961	soft_tissue	synovial_sarcoma	10189891
P35222	DEG_SCF_TRCP1_1	32	37	p.D32Y	871774	liver	carcinoma	10980116
P35222	DEG_SCF_TRCP1_1	32	37	p.D32Y	873740	endometrium	carcinoma	12708483
P35222	DEG_SCF_TRCP1_1	32	37	p.D32Y	1487077	endometrium	carcinoma	21168197
P35222	DEG_SCF_TRCP1_1	32	37	p.D32Y	915499	skin	adnexal_tumour	15606674
P35222	DEG_SCF_TRCP1_1	32	37	p.D32Y	871802	liver	carcinoma	10980116
P35222	DEG_SCF_TRCP1_1	32	37	p.I35S	1753959	pituitary	craniopharyngioma	21562037
P35222	DEG_SCF_TRCP1_1	32	37	p.I35S	1653722	soft_tissue	desmoid_tumour-fibromatosis	22305464
P35222	DEG_SCF_TRCP1_1	32	37	p.I35S	1509116	central_nervous_system	primitive_neuroectodermal_tumour-medulloblastoma	21358093
P35222	DEG_SCF_TRCP1_1	32	37	p.I35S	1919223	liver	carcinoma
P35222	DEG_SCF_TRCP1_1	32	37	p.I35S	871410	liver	carcinoma	10700176
P35222	DEG_SCF_TRCP1_1	32	37	p.I35S	1550287	liver	carcinoma	21457159
P35222	DEG_SCF_TRCP1_1	32	37	p.I35S	1550282	liver	carcinoma	21457159
P35222	DEG_SCF_TRCP1_1	32	37	p.I35S	1073417	liver	carcinoma	17187432
P35222	DEG_SCF_TRCP1_1	32	37	p.I35S	872836	liver	carcinoma	10665646
P35222	DEG_SCF_TRCP1_1	32	37	p.I35S	878299	liver	carcinoma	12375019
P35222	DEG_SCF_TRCP1_1	32	37	p.I35S	1879409	thymus	carcinoid-endocrine_tumour	23354304
P35222	DEG_SCF_TRCP1_1	32	37	p.I35S	868074	liver	carcinoma	11375957
P35222	DEG_SCF_TRCP1_1	32	37	p.I35S	872822	liver	carcinoma	10665646
P35222	DEG_SCF_TRCP1_1	32	37	p.I35S	876640	liver	other	11309340
P35222	DEG_SCF_TRCP1_1	32	37	p.I35S	1783516	endometrium	carcinoma
P35222	DEG_SCF_TRCP1_1	32	37	p.I35S	1073401	liver	carcinoma	17187432
P35222	DEG_SCF_TRCP1_1	32	37	p.I35S	1127369	liver	carcinoma	18282277
P35222	DEG_SCF_TRCP1_1	32	37	p.I35S	869443	soft_tissue	juvenile_angiofibroma	11238055
P35222	DEG_SCF_TRCP1_1	32	37	p.I35S	1713790	liver	carcinoma	22561517
P35222	DEG_SCF_TRCP1_1	32	37	p.I35S	1713804	liver	carcinoma	22561517
P35222	DEG_SCF_TRCP1_1	32	37	p.I35S	1919246	liver	carcinoma
P35222	DEG_SCF_TRCP1_1	32	37	p.I35S	870487	liver	carcinoma	11443619
P35222	DEG_SCF_TRCP1_1	32	37	p.I35S	1652974	liver	carcinoma
P35222	DEG_SCF_TRCP1_1	32	37	p.S37P	1472675	central_nervous_system	primitive_neuroectodermal_tumour-medulloblastoma	21060032
P35222	DEG_SCF_TRCP1_1	32	37	p.S37P	1566751	liver	carcinoma
P35222	DEG_SCF_TRCP1_1	32	37	p.S37P	1735435	central_nervous_system	primitive_neuroectodermal_tumour-medulloblastoma	22820256
P35222	DEG_SCF_TRCP1_1	32	37	p.S37P	867672	endometrium	carcinoma	11957146
P35222	DEG_SCF_TRCP1_1	32	37	p.S37P	1472671	central_nervous_system	primitive_neuroectodermal_tumour-medulloblastoma	21060032
P35222	DEG_SCF_TRCP1_1	32	37	p.S37P	1509108	central_nervous_system	primitive_neuroectodermal_tumour-medulloblastoma	21358093
P35222	DEG_SCF_TRCP1_1	32	37	p.S37P	1783432	endometrium	carcinoma
P35222	DEG_SCF_TRCP1_1	32	37	p.S37P	874639	large_intestine	adenoma	12838317
P35222	DEG_SCF_TRCP1_1	32	37	p.S37P	872890	liver	carcinoma	10595907
P35222	DEG_SCF_TRCP1_1	32	37	p.S37P	1783345	endometrium	carcinoma
P35222	DEG_SCF_TRCP1_1	32	37	p.S37P	1629198	pituitary	craniopharyngioma	22086512
P35222	DEG_SCF_TRCP1_1	32	37	p.S37P	873665	stomach	adenoma	11956818
P35222	DEG_SCF_TRCP1_1	32	37	p.S37P	1919158	liver	carcinoma
P35222	DEG_SCF_TRCP1_1	32	37	p.S37P	872361	stomach	other	11103790
P35222	DEG_SCF_TRCP1_1	32	37	p.S37P	909735	endometrium	carcinoma
P35222	DEG_SCF_TRCP1_1	32	37	p.S37P	1042764	pancreas	carcinoma	16967453
P35222	DEG_SCF_TRCP1_1	32	37	p.S37P	909705	ovary	carcinoma
P35222	DEG_SCF_TRCP1_1	32	37	p.S37P	1566790	liver	carcinoma	21822264
P35222	DEG_SCF_TRCP1_1	32	37	p.S37P	969523	skin	malignant_melanoma	11950921
P35222	DEG_SCF_TRCP1_1	32	37	p.S37P	874640	large_intestine	adenoma	12838317
P35222	DEG_SCF_TRCP1_1	32	37	p.S37P	1550283	liver	carcinoma	21457159
P35222	DEG_SCF_TRCP1_1	32	37	p.S37P	1919201	liver	carcinoma
P35222	DEG_SCF_TRCP1_1	32	37	p.S37P	1752573	central_nervous_system	primitive_neuroectodermal_tumour-medulloblastoma	22832581
P35222	DEG_SCF_TRCP1_1	32	37	p.S37P	870476	pancreas	carcinoma	11731417
P35222	DEG_SCF_TRCP1_1	32	37	p.S33P	1752621	central_nervous_system	primitive_neuroectodermal_tumour-medulloblastoma	22832581
P35222	DEG_SCF_TRCP1_1	32	37	p.S33P	1198296	liver	other	19200579
P35222	DEG_SCF_TRCP1_1	32	37	p.S33P	876638	liver	other	11309340
P35222	DEG_SCF_TRCP1_1	32	37	p.S33P	1042143	pituitary	craniopharyngioma	15891929
P35222	DEG_SCF_TRCP1_1	32	37	p.S33P	1783414	endometrium	carcinoma
P35222	DEG_SCF_TRCP1_1	32	37	p.S33P	876967	liver	carcinoma	11551833
P35222	DEG_SCF_TRCP1_1	32	37	p.S33P	1509112	central_nervous_system	primitive_neuroectodermal_tumour-medulloblastoma	21358093
P35222	DEG_SCF_TRCP1_1	32	37	p.S33P	867685	endometrium	carcinoma	11957146
P35222	DEG_SCF_TRCP1_1	32	37	p.S33P	1597999	central_nervous_system	primitive_neuroectodermal_tumour-medulloblastoma	20921458
P35222	DEG_SCF_TRCP1_1	32	37	p.S33P	873440	endometrium	carcinoma	12439748
P35222	DEG_SCF_TRCP1_1	32	37	p.S33P	1752609	central_nervous_system	primitive_neuroectodermal_tumour-medulloblastoma	22832581
P35222	DEG_SCF_TRCP1_1	32	37	p.S33P	1651283	large_intestine	carcinoma
P35222	DEG_SCF_TRCP1_1	32	37	p.S33P	870464	pancreas	carcinoma	11731417
P35222	DEG_SCF_TRCP1_1	32	37	p.S33P	1130542	liver	carcinoma	17510384
P35222	DEG_SCF_TRCP1_1	32	37	p.S33P	1042748	pancreas	carcinoma	16967453
P35222	DEG_SCF_TRCP1_1	32	37	p.S33P	1965386	skin	adnexal_tumour	23629955
P35222	DEG_SCF_TRCP1_1	32	37	p.S33P	868309	endometrium	carcinoma	10416591
P35222	DEG_SCF_TRCP1_1	32	37	p.S33P	874899	pituitary	craniopharyngioma	12466115
P35222	DEG_SCF_TRCP1_1	32	37	p.S33P	1783313	endometrium	carcinoma
P35222	DEG_SCF_TRCP1_1	32	37	p.S33P	1652960	liver	carcinoma
P35222	DEG_SCF_TRCP1_1	32	37	p.S33P	1042755	pancreas	carcinoma	16967453
P35222	DEG_SCF_TRCP1_1	32	37	p.S33P	1965393	skin	adnexal_tumour	23629955
P35222	DEG_SCF_TRCP1_1	32	37	p.S33P	1713805	liver	carcinoma	22561517
P35222	DEG_SCF_TRCP1_1	32	37	p.S33P	874486	pituitary	craniopharyngioma	15221941
P35222	DEG_SCF_TRCP1_1	32	37	p.S33P	1622605	liver	other	21992464
P35222	DEG_SCF_TRCP1_1	32	37	p.S33P	873438	endometrium	carcinoma	12439748
P35222	DEG_SCF_TRCP1_1	32	37	p.S33P	1127630	liver	carcinoma	18467159
P35222	DEG_SCF_TRCP1_1	32	37	p.S33P	1713723	liver	carcinoma	22561517
P35222	DEG_SCF_TRCP1_1	32	37	p.S33P	1919189	liver	carcinoma
P35222	DEG_SCF_TRCP1_1	32	37	p.S33P	873439	endometrium	carcinoma	12439748
P35222	DEG_SCF_TRCP1_1	32	37	p.S33P	876639	liver	other	11309340
P35222	DEG_SCF_TRCP1_1	32	37	p.S33P	1042759	pancreas	carcinoma	16967453
P35222	DEG_SCF_TRCP1_1	32	37	p.S33P	1073408	liver	carcinoma	17187432
P35222	DEG_SCF_TRCP1_1	32	37	p.S33P	1509109	central_nervous_system	primitive_neuroectodermal_tumour-medulloblastoma	21358093
P35222	DEG_SCF_TRCP1_1	32	37	p.S33P	874485	pituitary	craniopharyngioma	15221941
P35222	DEG_SCF_TRCP1_1	32	37	p.S33P	874483	pituitary	craniopharyngioma	15221941
P35222	DEG_SCF_TRCP1_1	32	37	p.S33P	878301	liver	carcinoma	12375019
P35222	DEG_SCF_TRCP1_1	32	37	p.S33P	869796	large_intestine	carcinoma	9515795
P35222	DEG_SCF_TRCP1_1	32	37	p.S33P	1713741	liver	carcinoma	22561517
P35222	DEG_SCF_TRCP1_1	32	37	p.S33P	1919217	liver	carcinoma
P35222	DEG_SCF_TRCP1_1	32	37	p.S33P	878302	liver	carcinoma	12375019
P35222	DEG_SCF_TRCP1_1	32	37	p.S33P	1073430	liver	carcinoma	17187432
P35222	DEG_SCF_TRCP1_1	32	37	p.S33P	979745	ovary	carcinoma	15668893
P35222	DEG_SCF_TRCP1_1	32	37	p.S33P	873167	liver	carcinoma	10487827
P35222	DEG_SCF_TRCP1_1	32	37	p.S33P	874346	liver	other	14692643
P35222	DEG_SCF_TRCP1_1	32	37	p.S33P	1783502	endometrium	carcinoma
P35222	DEG_SCF_TRCP1_1	32	37	p.S33P	869198	liver	carcinoma	9635572
P35222	DEG_SCF_TRCP1_1	32	37	p.S33P	871778	liver	carcinoma	10980116
P35222	DEG_SCF_TRCP1_1	32	37	p.S33P	1566773	liver	carcinoma
P35222	DEG_SCF_TRCP1_1	32	37	p.S33P	1669760	pancreas	carcinoma	21769465
P35222	DEG_SCF_TRCP1_1	32	37	p.S33P	870463	pancreas	carcinoma	11731417
P35222	DEG_SCF_TRCP1_1	32	37	p.S33P	1321369	pancreas	carcinoma	20180245
P35222	DEG_SCF_TRCP1_1	32	37	p.S33P	1173742	liver	carcinoma	18701503
P35222	DEG_SCF_TRCP1_1	32	37	p.S33P	876528	stomach	adenoma	11238048
P35222	DEG_SCF_TRCP1_1	32	37	p.S33P	876527	stomach	adenoma	11238048
P35222	DEG_SCF_TRCP1_1	32	37	p.S33P	1919238	liver	carcinoma
P35222	DEG_SCF_TRCP1_1	32	37	p.D32V	1071845	central_nervous_system	primitive_neuroectodermal_tumour-medulloblastoma	17172831
P35222	DEG_SCF_TRCP1_1	32	37	p.D32V	1566812	liver	carcinoma	21822264
P35222	DEG_SCF_TRCP1_1	32	37	p.D32V	1184016	central_nervous_system	primitive_neuroectodermal_tumour-medulloblastoma	18769486
P35222	DEG_SCF_TRCP1_1	32	37	p.D32V	1472642	central_nervous_system	primitive_neuroectodermal_tumour-medulloblastoma	21060032
P35222	DEG_SCF_TRCP1_1	32	37	p.D32V	1597998	central_nervous_system	primitive_neuroectodermal_tumour-medulloblastoma	20921458
P35222	DEG_SCF_TRCP1_1	32	37	p.D32V	1042596	skin	adnexal_tumour	16378715
P35222	DEG_SCF_TRCP1_1	32	37	p.D32V	1752608	central_nervous_system	primitive_neuroectodermal_tumour-medulloblastoma	22832581
P35222	DEG_SCF_TRCP1_1	32	37	p.D32V	1063890	central_nervous_system	primitive_neuroectodermal_tumour-medulloblastoma	16685513
P35222	DEG_SCF_TRCP1_1	32	37	p.D32V	1492244	liver	other	21237236
P35222	DEG_SCF_TRCP1_1	32	37	p.D32V	1321371	pancreas	carcinoma	20180245
P35222	DEG_SCF_TRCP1_1	32	37	p.D32V	1127625	liver	carcinoma	18467159
P35222	DEG_SCF_TRCP1_1	32	37	p.D32V	1189003	liver	carcinoma	19101982
P35222	DEG_SCF_TRCP1_1	32	37	p.D32V	1173741	liver	carcinoma	18701503
P35222	DEG_SCF_TRCP1_1	32	37	p.D32V	867673	endometrium	carcinoma	11957146
P35222	DEG_SCF_TRCP1_1	32	37	p.D32V	1041547	central_nervous_system	primitive_neuroectodermal_tumour-medulloblastoma	16258095
P35222	DEG_SCF_TRCP1_1	32	37	p.D32V	1797183	prostate	carcinoma
P35222	DEG_SCF_TRCP1_1	32	37	p.D32V	1713731	liver	carcinoma	22561517
P35222	DEG_SCF_TRCP1_1	32	37	p.D32V	1652962	liver	carcinoma
P35222	DEG_SCF_TRCP1_1	32	37	p.D32V	869162	liver	carcinoma	9671767
P35222	DEG_SCF_TRCP1_1	32	37	p.D32V	1919179	liver	carcinoma
P35222	DEG_SCF_TRCP1_1	32	37	p.D32V	1753960	pituitary	craniopharyngioma	21562037
P35222	DEG_SCF_TRCP1_1	32	37	p.D32V	1172577	prostate	carcinoma	18514389
P35222	DEG_SCF_TRCP1_1	32	37	p.D32V	873054	liver	carcinoma	10597262
P35222	DEG_SCF_TRCP1_1	32	37	p.D32V	1752577	central_nervous_system	primitive_neuroectodermal_tumour-medulloblastoma	22832581
P35222	DEG_SCF_TRCP1_1	32	37	p.D32V	738781	pancreas	carcinoma	11943721
P35222	DEG_SCF_TRCP1_1	32	37	p.D32V	1669775	pancreas	carcinoma	21769465
P35222	DEG_SCF_TRCP1_1	32	37	p.D32V	915502	skin	adnexal_tumour	15606674
P35222	DEG_SCF_TRCP1_1	32	37	p.D32V	1629207	pituitary	craniopharyngioma	22086512
P35222	DEG_SCF_TRCP1_1	32	37	p.D32V	1598008	central_nervous_system	primitive_neuroectodermal_tumour-medulloblastoma	20921458
P35222	DEG_SCF_TRCP1_1	32	37	p.D32V	1669757	pancreas	carcinoma	21769465
P35222	DEG_SCF_TRCP1_1	32	37	p.D32V	1669756	pancreas	carcinoma	21769465
P35222	DEG_SCF_TRCP1_1	32	37	p.D32V	915504	skin	adnexal_tumour	15606674
P35222	DEG_SCF_TRCP1_1	32	37	p.D32V	1127606	liver	carcinoma	18467159
P35222	DEG_SCF_TRCP1_1	32	37	p.D32V	1669758	pancreas	carcinoma	21769465
P35222	DEG_SCF_TRCP1_1	32	37	p.S33N	870294	liver	other	11276007
P35222	DEG_SCF_TRCP1_1	32	37	p.S33N	1127080	endometrium	other	18376386
P35222	DEG_SCF_TRCP1_1	32	37	p.S33N	1914059	lung	carcinoma
P35222	DEG_SCF_TRCP1_1	32	37	p.D32G	870293	liver	other	11276007
P35222	DEG_SCF_TRCP1_1	32	37	p.D32G	1732868	central_nervous_system	primitive_neuroectodermal_tumour-medulloblastoma	22722829
P35222	DEG_SCF_TRCP1_1	32	37	p.D32G	1042767	pancreas	carcinoma	16967453
P35222	DEG_SCF_TRCP1_1	32	37	p.D32G	1549973	large_intestine	carcinoma	21807601
P35222	DEG_SCF_TRCP1_1	32	37	p.D32G	868673	skin	adnexal_tumour	10192393
P35222	DEG_SCF_TRCP1_1	32	37	p.D32G	1919185	liver	carcinoma
P35222	DEG_SCF_TRCP1_1	32	37	p.D32G	873137	large_intestine	adenoma	10493496
P35222	DEG_SCF_TRCP1_1	32	37	p.D32G	874901	pituitary	craniopharyngioma	12466115
P35222	DEG_SCF_TRCP1_1	32	37	p.D32G	874769	liver	carcinoma	12845670
P35222	DEG_SCF_TRCP1_1	32	37	p.D32G	1127062	liver	other	17962810
P35222	DEG_SCF_TRCP1_1	32	37	p.D32G	1042815	pancreas	carcinoma	16523258
P35222	DEG_SCF_TRCP1_1	32	37	p.D32G	873202	stomach	carcinoma	10485468
P35222	DEG_SCF_TRCP1_1	32	37	p.D32G	873201	stomach	carcinoma	10485468
P35222	DEG_SCF_TRCP1_1	32	37	p.D32G	878047	liver	carcinoma	12101426
P35222	DEG_SCF_TRCP1_1	32	37	p.D32G	874773	liver	carcinoma	12845670
P35222	DEG_SCF_TRCP1_1	32	37	p.G34V	1589200	liver	other	19061838
P35222	DEG_SCF_TRCP1_1	32	37	p.D32G	969525	skin	malignant_melanoma	11950921
P35222	DEG_SCF_TRCP1_1	32	37	p.G34V	869168	liver	carcinoma	9671767
P35222	DEG_SCF_TRCP1_1	32	37	p.D32G	870467	pancreas	carcinoma	11731417
P35222	DEG_SCF_TRCP1_1	32	37	p.D32G	1042756	pancreas	carcinoma	16967453
P35222	DEG_SCF_TRCP1_1	32	37	p.G34V	1622821	liver	other	22183980
P35222	DEG_SCF_TRCP1_1	32	37	p.D32G	1126557	liver	carcinoma	17531558
P35222	DEG_SCF_TRCP1_1	32	37	p.D32G	1863751	lung	carcinoma	22975805
P35222	DEG_SCF_TRCP1_1	32	37	p.D32G	1189010	liver	carcinoma	19101982
P35222	DEG_SCF_TRCP1_1	32	37	p.D32G	873677	stomach	adenoma	11956818
P35222	DEG_SCF_TRCP1_1	32	37	p.G34V	1589239	liver	other	19061838
P35222	DEG_SCF_TRCP1_1	32	37	p.D32G	1550278	liver	carcinoma	21457159
P35222	DEG_SCF_TRCP1_1	32	37	p.D32G	870468	pancreas	carcinoma	11731417
P35222	DEG_SCF_TRCP1_1	32	37	p.D32G	1783456	endometrium	carcinoma
P35222	DEG_SCF_TRCP1_1	32	37	p.D32G	1173804	liver	carcinoma	18701503
P35222	DEG_SCF_TRCP1_1	32	37	p.D32G	867866	ovary	carcinoma	10433945
P35222	DEG_SCF_TRCP1_1	32	37	p.D32G	876506	stomach	adenoma	11238048
P35222	DEG_SCF_TRCP1_1	32	37	p.D32G	1073419	liver	carcinoma	17187432
P35222	DEG_SCF_TRCP1_1	32	37	p.D32G	1042394	ovary	low_malignant_potential_(borderline)_tumour	16429393
P35222	DEG_SCF_TRCP1_1	32	37	p.D32G	1073421	liver	carcinoma	17187432
P35222	DEG_SCF_TRCP1_1	32	37	p.D32G	1173802	liver	carcinoma	18701503
P35222	DEG_SCF_TRCP1_1	32	37	p.D32G	1127070	liver	other	17962810
P35222	DEG_SCF_TRCP1_1	32	37	p.D32G	872211	liver	other	10698519
P35222	DEG_SCF_TRCP1_1	32	37	p.D32G	1783358	endometrium	carcinoma
P35222	DEG_SCF_TRCP1_1	32	37	p.D32G	1652981	liver	carcinoma
P35222	DEG_SCF_TRCP1_1	32	37	p.G34V	1622806	liver	other	22183980
P35222	DEG_SCF_TRCP1_1	32	37	p.D32G	874475	NS	malignant_melanoma	15133491
P35222	DEG_SCF_TRCP1_1	32	37	p.D32G	1918895	liver	carcinoma
P35222	DEG_SCF_TRCP1_1	32	37	p.D32G	1549975	large_intestine	carcinoma	21807601
P35222	DEG_SCF_TRCP1_1	32	37	p.D32G	1713814	liver	carcinoma	22561517
P35222	DEG_SCF_TRCP1_1	32	37	p.D32G	1042763	pancreas	carcinoma	16967453
P35222	DEG_SCF_TRCP1_1	32	37	p.D32G	1550291	liver	carcinoma	21457159
P35222	DEG_SCF_TRCP1_1	32	37	p.D32G	1733389	central_nervous_system	glioma	22821383
P35222	DEG_SCF_TRCP1_1	32	37	p.D32G	871775	liver	carcinoma	10980116
P35222	DEG_SCF_TRCP1_1	32	37	p.D32G	868056	liver	carcinoma	11375957
P35222	DEG_SCF_TRCP1_1	32	37	p.G34V	1622597	liver	other	21992464
P35222	DEG_SCF_TRCP1_1	32	37	p.D32G	873203	stomach	carcinoma	10485468
P35222	DEG_SCF_TRCP1_1	32	37	p.G34V	1589240	liver	other	19061838
P35222	DEG_SCF_TRCP1_1	32	37	p.D32G	1550281	liver	carcinoma	21457159
P35222	DEG_SCF_TRCP1_1	32	37	p.D32G	1042758	pancreas	carcinoma	16967453
P35222	DEG_SCF_TRCP1_1	32	37	p.D32G	1173814	liver	carcinoma	18701503
P35222	DEG_SCF_TRCP1_1	32	37	p.D32G	1919137	liver	carcinoma
P35222	DEG_SCF_TRCP1_1	32	37	p.D32G	1566727	liver	carcinoma	21822264
P35222	DEG_SCF_TRCP1_1	32	37	p.D32G	876505	stomach	adenoma	11238048
P35222	DEG_SCF_TRCP1_1	32	37	p.D32G	1042753	pancreas	carcinoma	16967453
P35222	DEG_SCF_TRCP1_1	32	37	p.D32G	1732866	central_nervous_system	primitive_neuroectodermal_tumour-medulloblastoma	22722829
P35222	DEG_SCF_TRCP1_1	32	37	p.D32G	873735	endometrium	carcinoma	12708483
P35222	DEG_SCF_TRCP1_1	32	37	p.D32G	1549977	large_intestine	carcinoma	21807601
P35222	DEG_SCF_TRCP1_1	32	37	p.D32G	1713715	liver	carcinoma	22561517
P35222	DEG_SCF_TRCP1_1	32	37	p.D32G	876729	cervix	in_situ_neoplasm	11520139
P35222	DEG_SCF_TRCP1_1	32	37	p.D32G	1752594	central_nervous_system	primitive_neuroectodermal_tumour-medulloblastoma	22832581
P35222	DEG_SCF_TRCP1_1	32	37	p.D32G	1788281	soft_tissue	desmoid_tumour-fibromatosis	23020601
P35222	DEG_SCF_TRCP1_1	32	37	p.D32G	873200	stomach	carcinoma	10485468
P35222	DEG_SCF_TRCP1_1	32	37	p.D32G	872535	prostate	carcinoma	11102958
P35222	DEG_SCF_TRCP1_1	32	37	p.D32G	873041	liver	carcinoma	10597262
P35222	DEG_SCF_TRCP1_1	32	37	p.D32G	872904	liver	carcinoma	10595907
P35222	DEG_SCF_TRCP1_1	32	37	p.D32G	875908	ovary	carcinoma	11385321
P35222	DEG_SCF_TRCP1_1	32	37	p.D32G	873334	urinary_tract	carcinoma	12394763
P35222	DEG_SCF_TRCP1_1	32	37	p.D32G	1735428	central_nervous_system	primitive_neuroectodermal_tumour-medulloblastoma	22820256
P35222	DEG_SCF_TRCP1_1	32	37	p.D32G	1566733	liver	carcinoma	21822264
P35222	DEG_SCF_TRCP1_1	32	37	p.G34V	1589201	liver	other	19061838
P35222	DEG_SCF_TRCP1_1	32	37	p.D32G	876637	liver	other	11309340
P35222	DEG_SCF_TRCP1_1	32	37	p.I35M	1172693	liver	carcinoma	17393110
P35222	DEG_SCF_TRCP1_1	32	37	p.D32Y	1009636	ovary	carcinoma	16021566
P35222	DEG_SCF_TRCP1_1	32	37	p.D32Y	1009639	ovary	carcinoma	16021566
P35222	DEG_SCF_TRCP1_1	32	37	p.D32Y	1198283	liver	other	19200579
P35222	DEG_SCF_TRCP1_1	32	37	p.D32Y	1009633	endometrium	carcinoma	16021566
P35222	DEG_SCF_TRCP1_1	32	37	p.D32Y	1665004	skin	malignant_melanoma	22515704
P35222	DEG_SCF_TRCP1_1	32	37	p.D32Y	1622820	liver	other	22183980
P35222	DEG_SCF_TRCP1_1	32	37	p.D32Y	1191863	central_nervous_system	primitive_neuroectodermal_tumour-medulloblastoma	19197950
P35222	DEG_SCF_TRCP1_1	32	37	p.D32Y	1622593	liver	other	21992464
P35222	DEG_SCF_TRCP1_1	32	37	p.D32Y	1009635	endometrium	carcinoma	16021566
P35222	DEG_SCF_TRCP1_1	32	37	p.D32Y	1622595	liver	other	21992464
P35222	DEG_SCF_TRCP1_1	32	37	p.D32Y	1009632	ovary	carcinoma	16021566
P35222	DEG_SCF_TRCP1_1	32	37	p.D32Y	1589171	liver	other	19061838
P35222	DEG_SCF_TRCP1_1	32	37	p.S33A	738779	pancreas	carcinoma	11943721
P35222	DEG_SCF_TRCP1_1	32	37	p.G34V	1738893	breast	carcinoma	22538770
P35222	DEG_SCF_TRCP1_1	32	37	p.G34V	878133	liver	other	12101426
P35222	DEG_SCF_TRCP1_1	32	37	p.G34V	891791	endometrium	carcinoma	11329142
P35222	DEG_SCF_TRCP1_1	32	37	p.S33A	1042138	pituitary	craniopharyngioma	15891929
P35222	DEG_SCF_TRCP1_1	32	37	p.G34V	1669761	pancreas	carcinoma	21769465
P35222	DEG_SCF_TRCP1_1	32	37	p.S33A	878427	endometrium	carcinoma	12015762
P35222	DEG_SCF_TRCP1_1	32	37	p.G34V	1173853	liver	other	16937357
P35222	DEG_SCF_TRCP1_1	32	37	p.G34V	875914	endometrium	carcinoma	11385321
P35222	DEG_SCF_TRCP1_1	32	37	p.G34V	1121007	endometrium	carcinoma	18500270
P35222	DEG_SCF_TRCP1_1	32	37	p.S33A	867671	endometrium	carcinoma	11957146
P35222	DEG_SCF_TRCP1_1	32	37	p.G34V	873445	endometrium	carcinoma	12439748
P35222	DEG_SCF_TRCP1_1	32	37	p.G34V	1566723	liver	carcinoma	21822264
P35222	DEG_SCF_TRCP1_1	32	37	p.G34V	870486	liver	carcinoma	11443619
P35222	DEG_SCF_TRCP1_1	32	37	p.S33A	869439	soft_tissue	juvenile_angiofibroma	11238055
P35222	DEG_SCF_TRCP1_1	32	37	p.G34V	1651208	large_intestine	carcinoma
P35222	DEG_SCF_TRCP1_1	32	37	p.G34V	1622750	liver	other	21992464
P35222	DEG_SCF_TRCP1_1	32	37	p.G34V	1173812	liver	carcinoma	18701503
P35222	DEG_SCF_TRCP1_1	32	37	p.G34V	1040665	large_intestine	adenoma	15647192
P35222	DEG_SCF_TRCP1_1	32	37	p.G34V	1097407	endometrium	carcinoma	18084252
P35222	DEG_SCF_TRCP1_1	32	37	p.G34V	1127610	liver	carcinoma	18467159
P35222	DEG_SCF_TRCP1_1	32	37	p.G34V	891783	endometrium	carcinoma	11329142
P35222	DEG_SCF_TRCP1_1	32	37	p.G34V	875915	endometrium	carcinoma	11385321
P35222	DEG_SCF_TRCP1_1	32	37	p.S33A	1512945	central_nervous_system	primitive_neuroectodermal_tumour-medulloblastoma	21163964
P35222	DEG_SCF_TRCP1_1	32	37	p.G34V	877300	large_intestine	carcinoma	11107173
P35222	DEG_SCF_TRCP1_1	32	37	p.G34V	869270	liver	other	9927029
P35222	DEG_SCF_TRCP1_1	32	37	p.G34V	738775	pancreas	carcinoma	11943721
P35222	DEG_SCF_TRCP1_1	32	37	p.G34V	869168	liver	carcinoma	9671767
P35222	DEG_SCF_TRCP1_1	32	37	p.G34V	871517	endometrium	carcinoma	10671680
P35222	DEG_SCF_TRCP1_1	32	37	p.S33A	1919226	liver	carcinoma
P35222	DEG_SCF_TRCP1_1	32	37	p.G34V	876534	stomach	adenoma	11238048
P35222	DEG_SCF_TRCP1_1	32	37	p.G34V	1566774	liver	carcinoma
P35222	DEG_SCF_TRCP1_1	32	37	p.G34V	1783482	endometrium	carcinoma
P35222	DEG_SCF_TRCP1_1	32	37	p.S33A	873658	stomach	adenoma	11956818
P35222	DEG_SCF_TRCP1_1	32	37	p.S33A	1042151	pituitary	craniopharyngioma	15891929
P35222	DEG_SCF_TRCP1_1	32	37	p.S33A	1042139	pituitary	craniopharyngioma	15891929
P35222	DEG_SCF_TRCP1_1	32	37	p.G34V	869508	stomach	carcinoma	11241321
P35222	DEG_SCF_TRCP1_1	32	37	p.S33A	871779	liver	carcinoma	10980116
P35222	DEG_SCF_TRCP1_1	32	37	p.G34V	1765136	lung	carcinoma	22980975
P35222	DEG_SCF_TRCP1_1	32	37	p.S33A	1042150	pituitary	craniopharyngioma	15891929
P35222	DEG_SCF_TRCP1_1	32	37	p.G34V	875289	ovary	carcinoma	11719457
P35222	DEG_SCF_TRCP1_1	32	37	p.G34V	1783531	endometrium	carcinoma
P35222	DEG_SCF_TRCP1_1	32	37	p.G34V	877566	endometrium	carcinoma	11329142
P35222	DEG_SCF_TRCP1_1	32	37	p.G34V	876535	stomach	adenoma	11238048
P35222	DEG_SCF_TRCP1_1	32	37	p.G34V	873714	liver	carcinoma	12460462
P35222	DEG_SCF_TRCP1_1	32	37	p.G34V	869199	liver	carcinoma	9635572
P35222	DEG_SCF_TRCP1_1	32	37	p.G34V	868690	ovary	carcinoma	10417756
P35222	DEG_SCF_TRCP1_1	32	37	p.G34V	878049	liver	carcinoma	12101426
P35222	DEG_SCF_TRCP1_1	32	37	p.G34V	1598006	central_nervous_system	primitive_neuroectodermal_tumour-medulloblastoma	20921458
P35222	DEG_SCF_TRCP1_1	32	37	p.G34V	907070	liver	carcinoma
P35222	DEG_SCF_TRCP1_1	32	37	p.G34V	1041964	endometrium	hyperplasia	16160475
P35222	DEG_SCF_TRCP1_1	32	37	p.G34V	878137	liver	other	12101426
P35222	DEG_SCF_TRCP1_1	32	37	p.G34V	868317	endometrium	carcinoma	10416591
P35222	DEG_SCF_TRCP1_1	32	37	p.G34V	1184162	central_nervous_system	primitive_neuroectodermal_tumour-medulloblastoma	16567768
P35222	DEG_SCF_TRCP1_1	32	37	p.G34V	877718	liver	carcinoma	11375957
P35222	DEG_SCF_TRCP1_1	32	37	p.G34V	869271	liver	other	9927029
P35222	DEG_SCF_TRCP1_1	32	37	p.G34V	910786	large_intestine	carcinoma	15573917
P35222	DEG_SCF_TRCP1_1	32	37	p.G34V	1919209	liver	carcinoma
P35222	DEG_SCF_TRCP1_1	32	37	p.G34V	1173748	liver	carcinoma	18701503
P35222	DEG_SCF_TRCP1_1	32	37	p.S33A	891782	endometrium	carcinoma	11329142
P35222	DEG_SCF_TRCP1_1	32	37	p.S33A	1752624	central_nervous_system	primitive_neuroectodermal_tumour-medulloblastoma	22832581
P35222	DEG_SCF_TRCP1_1	32	37	p.G34V	869474	biliary_tract	other	11196159
P35222	DEG_SCF_TRCP1_1	32	37	p.G34V	738772	pancreas	carcinoma	11943721
P35222	DEG_SCF_TRCP1_1	32	37	p.G34V	1919251	liver	carcinoma
P35222	DEG_SCF_TRCP1_1	32	37	p.G34V	870355	central_nervous_system	primitive_neuroectodermal_tumour-medulloblastoma	11433413
P35222	DEG_SCF_TRCP1_1	32	37	p.G34V	738777	pancreas	carcinoma	11943721
P35222	DEG_SCF_TRCP1_1	32	37	p.G34V	1127636	liver	carcinoma	18467159
P35222	DEG_SCF_TRCP1_1	32	37	p.G34V	1492237	liver	other	21237236
P35222	DEG_SCF_TRCP1_1	32	37	p.S33A	1732867	central_nervous_system	primitive_neuroectodermal_tumour-medulloblastoma	22722829
P35222	DEG_SCF_TRCP1_1	32	37	p.G34V	1691659	pancreas	carcinoma	22158988
P35222	DEG_SCF_TRCP1_1	32	37	p.G34V	871808	liver	carcinoma	10980116
P35222	DEG_SCF_TRCP1_1	32	37	p.G34V	1919242	liver	carcinoma
P35222	DEG_SCF_TRCP1_1	32	37	p.S33A	873441	endometrium	carcinoma	12439748
P35222	DEG_SCF_TRCP1_1	32	37	p.G34V	1651634	large_intestine	carcinoma
P35222	DEG_SCF_TRCP1_1	32	37	p.G34V	876533	stomach	adenoma	11238048
P35222	DEG_SCF_TRCP1_1	32	37	p.G34V	877594	endometrium	carcinoma	11329142
P35222	DEG_SCF_TRCP1_1	32	37	p.G34V	868691	ovary	carcinoma	10417756
P35222	DEG_SCF_TRCP1_1	32	37	p.G34V	870477	pancreas	carcinoma	11731417
P35222	DEG_SCF_TRCP1_1	32	37	p.G34V	1130548	liver	carcinoma	17510384
P35222	DEG_SCF_TRCP1_1	32	37	p.G34V	1214218	pituitary	craniopharyngioma	19384065
P35222	DEG_SCF_TRCP1_1	32	37	p.G34V	871474	liver	carcinoma	10700176
P35222	DEG_SCF_TRCP1_1	32	37	p.G34V	1566726	liver	carcinoma	21822264
P35222	DEG_SCF_TRCP1_1	32	37	p.G34V	871547	endometrium	carcinoma	10671680
P35222	DEG_SCF_TRCP1_1	32	37	p.G34V	1598023	central_nervous_system	primitive_neuroectodermal_tumour-medulloblastoma	20921458
P35222	DEG_SCF_TRCP1_1	32	37	p.G34V	1321365	pancreas	carcinoma	20180245
P35222	DEG_SCF_TRCP1_1	32	37	p.G34V	1566755	liver	carcinoma
P35222	DEG_SCF_TRCP1_1	32	37	p.G34V	1173878	liver	other	16937357
P35222	DEG_SCF_TRCP1_1	32	37	p.G34V	1862730	prostate	adenoma	23265383
P35222	DEG_SCF_TRCP1_1	32	37	p.G34V	873565	lung	carcinoma	12065775
P35222	DEG_SCF_TRCP1_1	32	37	p.G34V	1516657	central_nervous_system	glioma	21073496
P35222	DEG_SCF_TRCP1_1	32	37	p.G34V	869757	large_intestine	carcinoma	9515795
P35222	DEG_SCF_TRCP1_1	32	37	p.G34V	875458	bone	calcifying_odontogenic_cyst	14578169
P35222	DEG_SCF_TRCP1_1	32	37	p.G34V	874760	liver	carcinoma	12845670
P35222	DEG_SCF_TRCP1_1	32	37	p.G34V	869512	stomach	carcinoma	11241321
P35222	DEG_SCF_TRCP1_1	32	37	p.G34V	869272	liver	other	9927029
P35222	DEG_SCF_TRCP1_1	32	37	p.S33A	877564	endometrium	carcinoma	11329142
P35222	DEG_SCF_TRCP1_1	32	37	p.G34V	867682	endometrium	carcinoma	11957146
P35222	DEG_SCF_TRCP1_1	32	37	p.G34V	915501	skin	adnexal_tumour	15606674
P35222	DEG_SCF_TRCP1_1	32	37	p.G34V	915498	skin	adnexal_tumour	15606674
P35222	DEG_SCF_TRCP1_1	32	37	p.D32E	1042805	pancreas	carcinoma	16523258
P35222	DEG_SCF_TRCP1_1	32	37	p.S37Y	1669774	pancreas	carcinoma	21769465
P35222	DEG_SCF_TRCP1_1	32	37	p.G34E	868235	stomach	carcinoma	10392898
P35222	DEG_SCF_TRCP1_1	32	37	p.G34E	1597949	liver	carcinoma	20923573
P35222	DEG_SCF_TRCP1_1	32	37	p.S37Y	871026	soft_tissue	malignant_fibrous_histiocytoma-pleomorphic_sarcoma	11007041
P35222	DEG_SCF_TRCP1_1	32	37	p.S37Y	872902	liver	carcinoma	10595907
P35222	DEG_SCF_TRCP1_1	32	37	p.S37Y	1434228	endometrium	carcinoma	18552176
P35222	DEG_SCF_TRCP1_1	32	37	p.S37Y	1919157	liver	carcinoma
P35222	DEG_SCF_TRCP1_1	32	37	p.S37Y	876552	stomach	adenoma	11238048
P35222	DEG_SCF_TRCP1_1	32	37	p.S37Y	878428	endometrium	carcinoma	12015762
P35222	DEG_SCF_TRCP1_1	32	37	p.S37Y	969524	skin	malignant_melanoma	11950921
P35222	DEG_SCF_TRCP1_1	32	37	p.S37Y	876553	stomach	adenoma	11238048
P35222	DEG_SCF_TRCP1_1	32	37	p.S37Y	1041550	central_nervous_system	primitive_neuroectodermal_tumour-medulloblastoma	16258095
P35222	DEG_SCF_TRCP1_1	32	37	p.S37Y	1943750	stomach	adenocarcinoma	22037554
P35222	DEG_SCF_TRCP1_1	32	37	p.S37Y	873757	skin	adnexal_tumour	12575848
P35222	DEG_SCF_TRCP1_1	32	37	p.S37Y	1732870	central_nervous_system	primitive_neuroectodermal_tumour-medulloblastoma	22722829
P35222	DEG_SCF_TRCP1_1	32	37	p.G34E	1622602	liver	other	21992464
P35222	DEG_SCF_TRCP1_1	32	37	p.S37Y	876095	ovary	carcinoma	11182035
P35222	DEG_SCF_TRCP1_1	32	37	p.S37Y	876551	stomach	adenoma	11238048
P35222	DEG_SCF_TRCP1_1	32	37	p.S37Y	873678	stomach	adenoma	11956818
P35222	DEG_SCF_TRCP1_1	32	37	p.S37Y	1042600	skin	adnexal_tumour	16378715
P35222	DEG_SCF_TRCP1_1	32	37	p.S37Y	1127617	liver	carcinoma	18467159
P35222	DEG_SCF_TRCP1_1	32	37	p.S37Y	1652900	central_nervous_system	primitive_neuroectodermal_tumour-medulloblastoma	22832583
P35222	DEG_SCF_TRCP1_1	32	37	p.S37Y	1472673	central_nervous_system	primitive_neuroectodermal_tumour-medulloblastoma	21060032
P35222	DEG_SCF_TRCP1_1	32	37	p.G34E	1589195	liver	other	19061838
P35222	DEG_SCF_TRCP1_1	32	37	p.S37Y	871811	liver	carcinoma	10980116
P35222	DEG_SCF_TRCP1_1	32	37	p.G34E	869164	liver	carcinoma	9671767
P35222	DEG_SCF_TRCP1_1	32	37	p.S37Y	1071836	central_nervous_system	primitive_neuroectodermal_tumour-medulloblastoma	17172831
P35222	DEG_SCF_TRCP1_1	32	37	p.S37Y	869165	liver	carcinoma	9671767
P35222	DEG_SCF_TRCP1_1	32	37	p.S37Y	872882	liver	carcinoma	10595907
P35222	DEG_SCF_TRCP1_1	32	37	p.G34E	1589168	liver	other	19061838
P35222	DEG_SCF_TRCP1_1	32	37	p.G34E	1009640	endometrium	carcinoma	16021566
P35222	DEG_SCF_TRCP1_1	32	37	p.S37Y	868061	liver	carcinoma	11375957
P35222	DEG_SCF_TRCP1_1	32	37	p.S37Y	1752580	central_nervous_system	primitive_neuroectodermal_tumour-medulloblastoma	22832581
P35222	DEG_SCF_TRCP1_1	32	37	p.S37Y	1127908	breast	carcinoma	18593979
P35222	DEG_SCF_TRCP1_1	32	37	p.G34E	1589205	liver	other	19061838
P35222	DEG_SCF_TRCP1_1	32	37	p.S37Y	1598019	central_nervous_system	primitive_neuroectodermal_tumour-medulloblastoma	20921458
P35222	DEG_SCF_TRCP1_1	32	37	p.S37Y	1652832	central_nervous_system	primitive_neuroectodermal_tumour-medulloblastoma	22832583
P35222	DEG_SCF_TRCP1_1	32	37	p.S37Y	1321364	pancreas	carcinoma	20180245
P35222	DEG_SCF_TRCP1_1	32	37	p.S37Y	1752593	central_nervous_system	primitive_neuroectodermal_tumour-medulloblastoma	22832581
P35222	DEG_SCF_TRCP1_1	32	37	p.G34E	1597958	liver	carcinoma	20923573
P35222	DEG_SCF_TRCP1_1	32	37	p.S37Y	1752595	central_nervous_system	primitive_neuroectodermal_tumour-medulloblastoma	22832581
P35222	DEG_SCF_TRCP1_1	32	37	p.S37Y	1042606	skin	adnexal_tumour	16378715
P35222	DEG_SCF_TRCP1_1	32	37	p.I35N	873171	liver	carcinoma	10487827
P35222	DEG_SCF_TRCP1_1	32	37	p.G34R	1652923	central_nervous_system	primitive_neuroectodermal_tumour-medulloblastoma	22832583
P35222	DEG_SCF_TRCP1_1	32	37	p.G34R	1691654	pancreas	carcinoma	22158988
P35222	DEG_SCF_TRCP1_1	32	37	p.G34R	1783532	endometrium	carcinoma
P35222	DEG_SCF_TRCP1_1	32	37	p.G34R	1753954	pituitary	craniopharyngioma	21562037
P35222	DEG_SCF_TRCP1_1	32	37	p.G34R	1652839	central_nervous_system	primitive_neuroectodermal_tumour-medulloblastoma	22832583
P35222	DEG_SCF_TRCP1_1	32	37	p.G34R	1042607	skin	adnexal_tumour	16378715
P35222	DEG_SCF_TRCP1_1	32	37	p.G34R	1333595	liver	carcinoma	20347502
P35222	DEG_SCF_TRCP1_1	32	37	p.G34R	1869514	endometrium	carcinoma	23028188
P35222	DEG_SCF_TRCP1_1	32	37	p.G34R	1752587	central_nervous_system	primitive_neuroectodermal_tumour-medulloblastoma	22832581
P35222	DEG_SCF_TRCP1_1	32	37	p.G34R	1472641	central_nervous_system	primitive_neuroectodermal_tumour-medulloblastoma	21060032
P35222	DEG_SCF_TRCP1_1	32	37	p.G34R	1598000	central_nervous_system	primitive_neuroectodermal_tumour-medulloblastoma	20921458
P35222	DEG_SCF_TRCP1_1	32	37	p.G34R	1042501	liver	other	16496320
P35222	DEG_SCF_TRCP1_1	32	37	p.G34R	874765	liver	carcinoma	12845670
P35222	DEG_SCF_TRCP1_1	32	37	p.G34R	1783314	endometrium	carcinoma
P35222	DEG_SCF_TRCP1_1	32	37	p.G34R	1472683	central_nervous_system	primitive_neuroectodermal_tumour-medulloblastoma	21060032
P35222	DEG_SCF_TRCP1_1	32	37	p.G34R	1214179	skin	adnexal_tumour	19384065
P35222	DEG_SCF_TRCP1_1	32	37	p.G34R	876562	liver	other	11666046
P35222	DEG_SCF_TRCP1_1	32	37	p.G34R	878136	liver	other	12101426
P35222	DEG_SCF_TRCP1_1	32	37	p.G34R	1889108	central_nervous_system	primitive_neuroectodermal_tumour-medulloblastoma	23525311
P35222	DEG_SCF_TRCP1_1	32	37	p.G34R	1735397	central_nervous_system	primitive_neuroectodermal_tumour-medulloblastoma	22820256
P35222	DEG_SCF_TRCP1_1	32	37	p.G34R	1321368	pancreas	carcinoma	20180245
P35222	DEG_SCF_TRCP1_1	32	37	p.G34R	1669759	pancreas	carcinoma	21769465
P35222	DEG_SCF_TRCP1_1	32	37	p.G34R	1042816	pancreas	carcinoma	17040296
P35222	DEG_SCF_TRCP1_1	32	37	p.G34R	1530261	lung	carcinoma	21292787
P35222	DEG_SCF_TRCP1_1	32	37	p.G34R	1598004	central_nervous_system	primitive_neuroectodermal_tumour-medulloblastoma	20921458
P35222	DEG_SCF_TRCP1_1	32	37	p.G34R	1076745	large_intestine	carcinoma	17011185
P35222	DEG_SCF_TRCP1_1	32	37	p.G34R	1713821	liver	carcinoma	22561517
P35222	DEG_SCF_TRCP1_1	32	37	p.G34R	874435	pancreas	carcinoma	15014986
P35222	DEG_SCF_TRCP1_1	32	37	p.G34R	870473	pancreas	carcinoma	11731417
P35222	DEG_SCF_TRCP1_1	32	37	p.G34R	868060	liver	carcinoma	11375957
P35222	DEG_SCF_TRCP1_1	32	37	p.G34R	872228	liver	other	10754205
P35222	DEG_SCF_TRCP1_1	32	37	p.G34R	873730	endometrium	carcinoma	12708483
P35222	DEG_SCF_TRCP1_1	32	37	p.G34R	1669770	pancreas	carcinoma	21769465
P35222	DEG_SCF_TRCP1_1	32	37	p.G34R	1713722	liver	carcinoma	22561517
P35222	DEG_SCF_TRCP1_1	32	37	p.G34R	1863695	lung	carcinoma	22975805
P35222	DEG_SCF_TRCP1_1	32	37	p.G34R	1598020	central_nervous_system	primitive_neuroectodermal_tumour-medulloblastoma	20921458
P35222	DEG_SCF_TRCP1_1	32	37	p.G34R	738787	pancreas	carcinoma	11943721
P35222	DEG_SCF_TRCP1_1	32	37	p.G34R	1566803	liver	carcinoma	21822264
P35222	DEG_SCF_TRCP1_1	32	37	p.G34R	876636	liver	other	11309340
P35222	DEG_SCF_TRCP1_1	32	37	p.G34R	1191074	endometrium	carcinoma	19085831
P35222	DEG_SCF_TRCP1_1	32	37	p.G34R	1783437	endometrium	carcinoma
P35222	DEG_SCF_TRCP1_1	32	37	p.G34R	1783493	endometrium	carcinoma
P35222	DEG_SCF_TRCP1_1	32	37	p.G34R	1127635	liver	carcinoma	18467159
P35222	DEG_SCF_TRCP1_1	32	37	p.G34R	876635	liver	other	11309340
P35222	DEG_SCF_TRCP1_1	32	37	p.G34R	876643	liver	other	11309340
P35222	DEG_SCF_TRCP1_1	32	37	p.G34R	868312	endometrium	carcinoma	10416591
P35222	DEG_SCF_TRCP1_1	32	37	p.G34R	1752598	central_nervous_system	primitive_neuroectodermal_tumour-medulloblastoma	22832581
P35222	DEG_SCF_TRCP1_1	32	37	p.G34R	870474	pancreas	carcinoma	11731417
P35222	DEG_SCF_TRCP1_1	32	37	p.G34R	1214217	pituitary	craniopharyngioma	19384065
P35222	DEG_SCF_TRCP1_1	32	37	p.G34R	1732871	central_nervous_system	primitive_neuroectodermal_tumour-medulloblastoma	22722829
P35222	DEG_SCF_TRCP1_1	32	37	p.G34R	1492240	liver	other	21237236
P35222	DEG_SCF_TRCP1_1	32	37	p.G34R	1752597	central_nervous_system	primitive_neuroectodermal_tumour-medulloblastoma	22832581
P35222	DEG_SCF_TRCP1_1	32	37	p.G34R	1191075	endometrium	carcinoma	19085831
P35222	DEG_SCF_TRCP1_1	32	37	p.G34R	1333596	liver	carcinoma	20347502
P35222	DEG_SCF_TRCP1_1	32	37	p.G34R	1783400	endometrium	carcinoma
P35222	DEG_SCF_TRCP1_1	32	37	p.G34R	1076744	large_intestine	adenoma	17011185
P35222	DEG_SCF_TRCP1_1	32	37	p.G34R	1752585	central_nervous_system	primitive_neuroectodermal_tumour-medulloblastoma	22832581
P35222	DEG_SCF_TRCP1_1	32	37	p.G34R	1752568	central_nervous_system	primitive_neuroectodermal_tumour-medulloblastoma	22832581
P35222	DEG_SCF_TRCP1_1	32	37	p.G34R	878296	liver	carcinoma	12375019
P35222	DEG_SCF_TRCP1_1	32	37	p.G34R	1669751	pancreas	carcinoma	21769465
P35222	DEG_SCF_TRCP1_1	32	37	p.G34R	1184024	central_nervous_system	primitive_neuroectodermal_tumour-medulloblastoma	18769486
P35222	DEG_SCF_TRCP1_1	32	37	p.G34R	1127612	liver	carcinoma	18467159
P35222	DEG_SCF_TRCP1_1	32	37	p.G34R	876536	stomach	adenoma	11238048
P35222	DEG_SCF_TRCP1_1	32	37	p.G34R	1691660	pancreas	carcinoma	22158988
P35222	DEG_SCF_TRCP1_1	32	37	p.G34R	1472639	central_nervous_system	primitive_neuroectodermal_tumour-medulloblastoma	21060032
P35222	DEG_SCF_TRCP1_1	32	37	p.G34R	872222	liver	other	10754205
P35222	DEG_SCF_TRCP1_1	32	37	p.G34R	738792	pancreas	carcinoma	11943721
P35222	DEG_SCF_TRCP1_1	32	37	p.G34R	1492243	liver	other	21237236
P35222	DEG_SCF_TRCP1_1	32	37	p.G34R	873051	liver	carcinoma	10597262
P35222	DEG_SCF_TRCP1_1	32	37	p.G34R	1130547	liver	carcinoma	17510384
P35222	DEG_SCF_TRCP1_1	32	37	p.G34R	876537	stomach	adenoma	11238048
P35222	DEG_SCF_TRCP1_1	32	37	p.G34R	1127611	liver	carcinoma	18467159
P35222	DEG_SCF_TRCP1_1	32	37	p.G34R	1173828	liver	carcinoma	18701503
P35222	DEG_SCF_TRCP1_1	32	37	p.G34R	1752625	central_nervous_system	primitive_neuroectodermal_tumour-medulloblastoma	22832581
P35222	DEG_SCF_TRCP1_1	32	37	p.I35S	1589169	liver	other	19061838
P35222	DEG_SCF_TRCP1_1	32	37	p.I35S	1622606	liver	other	21992464
P35222	DEG_SCF_TRCP1_1	32	37	p.I35S	1589186	liver	other	19061838
P35222	DEG_SCF_TRCP1_1	32	37	p.I35S	1597959	liver	carcinoma	20923573
P35222	DEG_SCF_TRCP1_1	32	37	p.I35S	1198284	liver	other	19200579
P35222	DEG_SCF_TRCP1_1	32	37	p.D32E	969524	skin	malignant_melanoma	11950921
P35222	DEG_SCF_TRCP1_1	32	37	p.I35S	1198292	liver	other	19200579
P35222	DEG_SCF_TRCP1_1	32	37	p.S33N	1129684	kidney	Wilms_tumour	18464243
P35222	DEG_SCF_TRCP1_1	32	37	p.D32H	1304107	adrenal_gland	adrenal_cortical_carcinoma	19498322
P35222	DEG_SCF_TRCP1_1	32	37	p.I35S	1646816	lung	carcinoma	22327622
P35222	DEG_SCF_TRCP1_1	32	37	p.D32H	1870282	skin	malignant_melanoma	23239741
P35222	DEG_SCF_TRCP1_1	32	37	p.I35S	1622822	liver	other	22183980
P35222	DEG_SCF_TRCP1_1	32	37	p.D32A	1669767	pancreas	carcinoma	21769465
P35222	DEG_SCF_TRCP1_1	32	37	p.D32A	872824	liver	carcinoma	10665646
P35222	DEG_SCF_TRCP1_1	32	37	p.D32A	1713740	liver	carcinoma	22561517
P35222	DEG_SCF_TRCP1_1	32	37	p.D32A	1041973	endometrium	hyperplasia	16160475
P35222	DEG_SCF_TRCP1_1	32	37	p.D32A	1691657	pancreas	carcinoma	22158988
P35222	DEG_SCF_TRCP1_1	32	37	p.D32A	1652876	central_nervous_system	primitive_neuroectodermal_tumour-medulloblastoma	22832583
P35222	DEG_SCF_TRCP1_1	32	37	p.D32A	1472684	central_nervous_system	primitive_neuroectodermal_tumour-medulloblastoma	21060032
P35222	DEG_SCF_TRCP1_1	32	37	p.D32A	872838	liver	carcinoma	10665646
P35222	DEG_SCF_TRCP1_1	32	37	p.D32A	1673891	NS	malignant_melanoma	22622578
P35222	DEG_SCF_TRCP1_1	32	37	p.D32A	868074	liver	carcinoma	11375957
P35222	DEG_SCF_TRCP1_1	32	37	p.D32A	876572	liver	other	11666046
P35222	DEG_SCF_TRCP1_1	32	37	p.D32A	1838444	NS	malignant_melanoma	22817889
P35222	DEG_SCF_TRCP1_1	32	37	p.D32A	872899	liver	carcinoma	10595907
P35222	DEG_SCF_TRCP1_1	32	37	p.D32A	873734	endometrium	carcinoma	12708483
P35222	DEG_SCF_TRCP1_1	32	37	p.D32A	873174	liver	carcinoma	10487827
P35222	DEG_SCF_TRCP1_1	32	37	p.D32A	1131741	ovary	carcinoma	17418409
P35222	DEG_SCF_TRCP1_1	32	37	p.D32A	1669755	pancreas	carcinoma	21769465
P35222	DEG_SCF_TRCP1_1	32	37	p.H36Y	1072071	stomach	carcinoma	17163846
P35222	DEG_SCF_TRCP1_1	32	37	p.H36Y	1673886	skin	malignant_melanoma	22622578
P35222	DEG_SCF_TRCP1_1	32	37	p.H36Y	870291	liver	other	11276007
P35222	DEG_SCF_TRCP1_1	32	37	p.H36Y	868028	thyroid	carcinoma	10213482
P35222	DEG_SCF_TRCP1_1	32	37	p.H36Y	1072046	stomach	carcinoma	17163846
P35222	DEG_SCF_TRCP1_1	32	37	p.I35T	1585380	salivary_gland	adenoma	21323741
P35222	DEG_SCF_TRCP1_1	32	37	p.I35T	1585383	salivary_gland	adenoma	21323741
P35222	DEG_SCF_TRCP1_1	32	37	p.I35T	1585395	salivary_gland	adenoma	21323741
P35222	DEG_SCF_TRCP1_1	32	37	p.I35T	1585379	salivary_gland	adenoma	21323741
P35222	DEG_SCF_TRCP1_1	32	37	p.I35T	1585392	salivary_gland	adenoma	21323741
P35222	DEG_SCF_TRCP1_1	32	37	p.I35T	914546	salivary_gland	carcinoma	15195113
P35222	DEG_SCF_TRCP1_1	32	37	p.I35T	1585390	salivary_gland	adenoma	21323741
P35222	DEG_SCF_TRCP1_1	32	37	p.I35T	1651277	large_intestine	carcinoma
P35222	DEG_SCF_TRCP1_1	32	37	p.I35T	1585393	salivary_gland	adenoma	21323741
P35222	DEG_SCF_TRCP1_1	32	37	p.I35T	1714145	kidney	Wilms_tumour	22470196
P35222	DEG_SCF_TRCP1_1	32	37	p.I35T	1585378	salivary_gland	adenoma	21323741
P35222	DEG_SCF_TRCP1_1	32	37	p.I35T	1585386	salivary_gland	adenoma	21323741
P35222	DEG_SCF_TRCP1_1	32	37	p.I35T	1585385	salivary_gland	adenoma	21323741
P35222	DEG_SCF_TRCP1_1	32	37	p.I35T	1042323	salivary_gland	carcinoma	15943036
P35222	DEG_SCF_TRCP1_1	32	37	p.H36R	1550285	liver	carcinoma	21457159
P35222	DEG_SCF_TRCP1_1	32	37	p.H36R	1550292	liver	carcinoma	21457159
P35222	DEG_SCF_TRCP1_1	32	37	p.H36R	1130537	liver	carcinoma	17510384
P35222	DEG_SCF_TRCP1_1	32	37	p.S37A	1172716	parathyroid	adenoma	18541010
P35222	DEG_SCF_TRCP1_1	32	37	p.S37A	1783412	endometrium	carcinoma
P35222	DEG_SCF_TRCP1_1	32	37	p.S37A	876954	large_intestine	carcinoid-endocrine_tumour	11559529
P35222	DEG_SCF_TRCP1_1	32	37	p.S37A	875292	ovary	carcinoma	11719457
P35222	DEG_SCF_TRCP1_1	32	37	p.S37A	1054775	parathyroid	adenoma	17047023
P35222	DEG_SCF_TRCP1_1	32	37	p.S37A	876945	stomach	carcinoid-endocrine_tumour	11559529
P35222	DEG_SCF_TRCP1_1	32	37	p.S37A	877547	endometrium	carcinoma	11329142
P35222	DEG_SCF_TRCP1_1	32	37	p.S37A	878702	stomach	carcinoma	12067995
P35222	DEG_SCF_TRCP1_1	32	37	p.S37A	876960	large_intestine	carcinoid-endocrine_tumour	11559529
P35222	DEG_SCF_TRCP1_1	32	37	p.S37A	876952	small_intestine	carcinoid-endocrine_tumour	11559529
P35222	DEG_SCF_TRCP1_1	32	37	p.S37A	876948	small_intestine	carcinoid-endocrine_tumour	11559529
P35222	DEG_SCF_TRCP1_1	32	37	p.S37A	876943	stomach	carcinoid-endocrine_tumour	11559529
P35222	DEG_SCF_TRCP1_1	32	37	p.S37A	876951	small_intestine	carcinoid-endocrine_tumour	11559529
P35222	DEG_SCF_TRCP1_1	32	37	p.S37A	1472668	central_nervous_system	primitive_neuroectodermal_tumour-medulloblastoma	21060032
P35222	DEG_SCF_TRCP1_1	32	37	p.S37A	1783347	endometrium	carcinoma
P35222	DEG_SCF_TRCP1_1	32	37	p.S37A	873670	stomach	adenoma	11956818
P35222	DEG_SCF_TRCP1_1	32	37	p.S37A	876961	large_intestine	carcinoid-endocrine_tumour	11559529
P35222	DEG_SCF_TRCP1_1	32	37	p.S37A	876949	small_intestine	carcinoid-endocrine_tumour	11559529
P35222	DEG_SCF_TRCP1_1	32	37	p.S37A	868980	endometrium	carcinoma	9721853
P35222	DEG_SCF_TRCP1_1	32	37	p.S37A	1173743	liver	carcinoma	18701503
P35222	DEG_SCF_TRCP1_1	32	37	p.S37A	873657	stomach	adenoma	11956818
P35222	DEG_SCF_TRCP1_1	32	37	p.S37A	876957	large_intestine	carcinoid-endocrine_tumour	11559529
P35222	DEG_SCF_TRCP1_1	32	37	p.S37A	1783480	endometrium	carcinoma
P35222	DEG_SCF_TRCP1_1	32	37	p.S37A	876963	large_intestine	carcinoid-endocrine_tumour	11559529
P35222	DEG_SCF_TRCP1_1	32	37	p.S37A	876941	stomach	carcinoid-endocrine_tumour	11559529
P35222	DEG_SCF_TRCP1_1	32	37	p.S37A	1172721	parathyroid	adenoma	18541010
P35222	DEG_SCF_TRCP1_1	32	37	p.S37A	876965	large_intestine	carcinoid-endocrine_tumour	11559529
P35222	DEG_SCF_TRCP1_1	32	37	p.S37A	1172720	parathyroid	adenoma	18541010
P35222	DEG_SCF_TRCP1_1	32	37	p.S37A	876955	large_intestine	carcinoid-endocrine_tumour	11559529
P35222	DEG_SCF_TRCP1_1	32	37	p.S37A	1172717	parathyroid	adenoma	18541010
P35222	DEG_SCF_TRCP1_1	32	37	p.S37A	876953	small_intestine	carcinoid-endocrine_tumour	11559529
P35222	DEG_SCF_TRCP1_1	32	37	p.S37A	871428	liver	carcinoma	10700176
P35222	DEG_SCF_TRCP1_1	32	37	p.S37A	876964	large_intestine	carcinoid-endocrine_tumour	11559529
P35222	DEG_SCF_TRCP1_1	32	37	p.S37A	1173739	liver	carcinoma	18701503
P35222	DEG_SCF_TRCP1_1	32	37	p.S37A	877563	endometrium	carcinoma	11329142
P35222	DEG_SCF_TRCP1_1	32	37	p.S37A	878297	liver	carcinoma	12375019
P35222	DEG_SCF_TRCP1_1	32	37	p.S37A	878704	stomach	carcinoma	12067995
P35222	DEG_SCF_TRCP1_1	32	37	p.S37A	872231	central_nervous_system	primitive_neuroectodermal_tumour-medulloblastoma	10666372
P35222	DEG_SCF_TRCP1_1	32	37	p.S37A	878710	stomach	carcinoma	12067995
P35222	DEG_SCF_TRCP1_1	32	37	p.S37A	1752614	central_nervous_system	primitive_neuroectodermal_tumour-medulloblastoma	22832581
P35222	DEG_SCF_TRCP1_1	32	37	p.S37A	871448	liver	carcinoma	10700176
P35222	DEG_SCF_TRCP1_1	32	37	p.S37A	876958	large_intestine	carcinoid-endocrine_tumour	11559529
P35222	DEG_SCF_TRCP1_1	32	37	p.S37A	876947	small_intestine	carcinoid-endocrine_tumour	11559529
P35222	DEG_SCF_TRCP1_1	32	37	p.S37A	876317	endometrium	carcinoma	11161379
P35222	DEG_SCF_TRCP1_1	32	37	p.S37A	875688	endometrium	hyperplasia	12635138
P35222	DEG_SCF_TRCP1_1	32	37	p.S37A	876950	small_intestine	carcinoid-endocrine_tumour	11559529
P35222	DEG_SCF_TRCP1_1	32	37	p.S37A	876956	large_intestine	carcinoid-endocrine_tumour	11559529
P35222	DEG_SCF_TRCP1_1	32	37	p.S37A	1172719	parathyroid	adenoma	18541010
P35222	DEG_SCF_TRCP1_1	32	37	p.S37A	878705	stomach	carcinoma	12067995
P35222	DEG_SCF_TRCP1_1	32	37	p.S37A	1054774	parathyroid	adenoma	17047023
P35222	DEG_SCF_TRCP1_1	32	37	p.S37A	876940	stomach	carcinoid-endocrine_tumour	11559529
P35222	DEG_SCF_TRCP1_1	32	37	p.S37A	875286	ovary	carcinoma	11719457
P35222	DEG_SCF_TRCP1_1	32	37	p.S37A	868073	liver	carcinoma	11375957
P35222	DEG_SCF_TRCP1_1	32	37	p.S37A	1054776	parathyroid	adenoma	17047023
P35222	DEG_SCF_TRCP1_1	32	37	p.S37A	1172718	parathyroid	adenoma	18541010
P35222	DEG_SCF_TRCP1_1	32	37	p.S37A	873053	liver	carcinoma	10597262
P35222	DEG_SCF_TRCP1_1	32	37	p.S37A	876946	small_intestine	carcinoid-endocrine_tumour	11559529
P35222	DEG_SCF_TRCP1_1	32	37	p.S37A	876962	large_intestine	carcinoid-endocrine_tumour	11559529
P35222	DEG_SCF_TRCP1_1	32	37	p.S37A	876966	large_intestine	carcinoid-endocrine_tumour	11559529
P35222	DEG_SCF_TRCP1_1	32	37	p.S37A	876944	stomach	carcinoid-endocrine_tumour	11559529
P35222	DEG_SCF_TRCP1_1	32	37	p.S37A	1127641	liver	carcinoma	18467159
P35222	DEG_SCF_TRCP1_1	32	37	p.S37A	876942	stomach	carcinoid-endocrine_tumour	11559529
P35222	DEG_SCF_TRCP1_1	32	37	p.S37A	891781	endometrium	carcinoma	11329142
P35222	DEG_SCF_TRCP1_1	32	37	p.D32H	1072057	stomach	carcinoma	17163846
P35222	DEG_SCF_TRCP1_1	32	37	p.D32H	1509106	central_nervous_system	primitive_neuroectodermal_tumour-medulloblastoma	21358093
P35222	DEG_SCF_TRCP1_1	32	37	p.D32H	875276	ovary	carcinoma	11719457
P35222	DEG_SCF_TRCP1_1	32	37	p.D32H	1042141	pituitary	craniopharyngioma	15891929
P35222	DEG_SCF_TRCP1_1	32	37	p.D32H	868316	endometrium	carcinoma	10416591
P35222	DEG_SCF_TRCP1_1	32	37	p.D32H	948872	pancreas	other	11696422
P35222	DEG_SCF_TRCP1_1	32	37	p.D32H	1197392	NS	malignant_melanoma	19234609
P35222	DEG_SCF_TRCP1_1	32	37	p.D32H	1466567	liver	carcinoma	20963515
P35222	DEG_SCF_TRCP1_1	32	37	p.D32H	740574	haematopoietic_and_lymphoid_tissue	lymphoid_neoplasm	11927008
P35222	DEG_SCF_TRCP1_1	32	37	p.D32H	1176273	pituitary	craniopharyngioma	18540944
P35222	DEG_SCF_TRCP1_1	32	37	p.D32H	1042136	pituitary	craniopharyngioma	15891929
P35222	DEG_SCF_TRCP1_1	32	37	p.D32H	1072016	stomach	carcinoma	17163846
P35222	DEG_SCF_TRCP1_1	32	37	p.D32H	1072015	stomach	carcinoma	17163846
P35222	DEG_SCF_TRCP1_1	32	37	p.D32H	1919135	liver	carcinoma
P35222	DEG_SCF_TRCP1_1	32	37	p.D32H	1466572	liver	carcinoma	20963515
P35222	DEG_SCF_TRCP1_1	32	37	p.D32H	875284	ovary	carcinoma	11719457
P35222	DEG_SCF_TRCP1_1	32	37	p.D32H	877899	endometrium	carcinoma	12111402
P35222	DEG_SCF_TRCP1_1	32	37	p.D32H	1753940	pituitary	craniopharyngioma	21562037
P35222	DEG_SCF_TRCP1_1	32	37	p.D32H	1797210	prostate	carcinoma
P35222	DEG_SCF_TRCP1_1	32	37	p.D32H	1072008	stomach	carcinoma	17163846
P35222	DEG_SCF_TRCP1_1	32	37	p.D32H	875689	endometrium	hyperplasia	12635138
P35222	DEG_SCF_TRCP1_1	32	37	p.D32H	1174110	pituitary	craniopharyngioma	18540944
P35222	DEG_SCF_TRCP1_1	32	37	p.D32H	1042142	pituitary	craniopharyngioma	15891929
P35222	DEG_SCF_TRCP1_1	32	37	p.D32H	948865	pancreas	other	11696422
P35222	DEG_SCF_TRCP1_1	32	37	p.D32H	1691656	pancreas	carcinoma	22158988
P35222	DEG_SCF_TRCP1_1	32	37	p.D32H	878300	liver	carcinoma	12375019
P35222	DEG_SCF_TRCP1_1	32	37	p.D32H	1072014	stomach	carcinoma	17163846
P35222	DEG_SCF_TRCP1_1	32	37	p.D32H	1042132	pituitary	craniopharyngioma	15891929
P35222	DEG_SCF_TRCP1_1	32	37	p.D32H	1898144	urinary_tract	carcinoma
P35222	DEG_SCF_TRCP1_1	32	37	p.D32H	1072011	stomach	carcinoma	17163846
P35222	DEG_SCF_TRCP1_1	32	37	p.D32H	1072010	stomach	carcinoma	17163846
P35222	DEG_SCF_TRCP1_1	32	37	p.D32H	1042160	pituitary	craniopharyngioma	15891929
P35222	DEG_SCF_TRCP1_1	32	37	p.D32H	1072040	stomach	carcinoma	17163846
P35222	DEG_SCF_TRCP1_1	32	37	p.D32H	1176272	pituitary	craniopharyngioma	18540944
P35222	DEG_SCF_TRCP1_1	32	37	p.D32H	876509	stomach	adenoma	11238048
P35222	DEG_SCF_TRCP1_1	32	37	p.D32H	874905	pituitary	craniopharyngioma	12466115
P35222	DEG_SCF_TRCP1_1	32	37	p.D32H	1127605	liver	carcinoma	18467159
P35222	DEG_SCF_TRCP1_1	32	37	p.D32H	1176278	pituitary	craniopharyngioma	18540944
P35222	DEG_SCF_TRCP1_1	32	37	p.D32H	1042164	pituitary	craniopharyngioma	15891929
P35222	DEG_SCF_TRCP1_1	32	37	p.D32H	1566735	liver	carcinoma	21822264
P35222	DEG_SCF_TRCP1_1	32	37	p.D32H	1072072	stomach	carcinoma	17163846
P35222	DEG_SCF_TRCP1_1	32	37	p.D32H	871235	central_nervous_system	primitive_neuroectodermal_tumour-medulloblastoma	10759189
P35222	DEG_SCF_TRCP1_1	32	37	p.S37F	1589252	liver	other	19061838
P35222	DEG_SCF_TRCP1_1	32	37	p.S37F	1589253	liver	other	19061838
P35222	DEG_SCF_TRCP1_1	32	37	p.S37F	1719621	soft_tissue	desmoid_tumour-fibromatosis	22766794
P35222	DEG_SCF_TRCP1_1	32	37	p.S37F	1589242	liver	other	19061838
P35222	DEG_SCF_TRCP1_1	32	37	p.S37F	1479470	central_nervous_system	primitive_neuroectodermal_tumour-medulloblastoma	21150899
P35222	DEG_SCF_TRCP1_1	32	37	p.G34E	868323	endometrium	carcinoma	10416591
P35222	DEG_SCF_TRCP1_1	32	37	p.G34E	868235	stomach	carcinoma	10392898
P35222	DEG_SCF_TRCP1_1	32	37	p.G34E	1434231	endometrium	carcinoma	18552176
P35222	DEG_SCF_TRCP1_1	32	37	p.G34E	872804	liver	carcinoma	10665646
P35222	DEG_SCF_TRCP1_1	32	37	p.G34E	1752576	central_nervous_system	primitive_neuroectodermal_tumour-medulloblastoma	22832581
P35222	DEG_SCF_TRCP1_1	32	37	p.G34E	1707674	stomach	carcinoma	22723903
P35222	DEG_SCF_TRCP1_1	32	37	p.G34E	1566744	liver	carcinoma
P35222	DEG_SCF_TRCP1_1	32	37	p.G34E	876316	endometrium	carcinoma	11161379
P35222	DEG_SCF_TRCP1_1	32	37	p.G34E	878129	liver	other	12101426
P35222	DEG_SCF_TRCP1_1	32	37	p.S37C	1745419	endometrium	carcinoma	22635024
P35222	DEG_SCF_TRCP1_1	32	37	p.G34E	1197905	central_nervous_system	primitive_neuroectodermal_tumour-medulloblastoma	19293793
P35222	DEG_SCF_TRCP1_1	32	37	p.G34E	1783363	endometrium	carcinoma
P35222	DEG_SCF_TRCP1_1	32	37	p.G34E	1472682	central_nervous_system	primitive_neuroectodermal_tumour-medulloblastoma	21060032
P35222	DEG_SCF_TRCP1_1	32	37	p.G34E	1752563	central_nervous_system	primitive_neuroectodermal_tumour-medulloblastoma	22832581
P35222	DEG_SCF_TRCP1_1	32	37	p.S37C	1479464	central_nervous_system	primitive_neuroectodermal_tumour-medulloblastoma	21150899
P35222	DEG_SCF_TRCP1_1	32	37	p.G34E	878052	liver	carcinoma	12101426
P35222	DEG_SCF_TRCP1_1	32	37	p.G34E	1566804	liver	carcinoma	21822264
P35222	DEG_SCF_TRCP1_1	32	37	p.G34E	1076743	large_intestine	serrated_polyp	17011185
P35222	DEG_SCF_TRCP1_1	32	37	p.G34E	1127634	liver	carcinoma	18467159
P35222	DEG_SCF_TRCP1_1	32	37	p.G34E	875287	ovary	carcinoma	11719457
P35222	DEG_SCF_TRCP1_1	32	37	p.G34E	868324	endometrium	hyperplasia	10416591
P35222	DEG_SCF_TRCP1_1	32	37	p.G34E	1071818	central_nervous_system	primitive_neuroectodermal_tumour-medulloblastoma	17172831
P35222	DEG_SCF_TRCP1_1	32	37	p.G34E	873708	stomach	carcinoma	12460462
P35222	DEG_SCF_TRCP1_1	32	37	p.G34E	871782	liver	carcinoma	10980116
P35222	DEG_SCF_TRCP1_1	32	37	p.G34E	870292	liver	other	11276007
P35222	DEG_SCF_TRCP1_1	32	37	p.G34E	1173815	liver	carcinoma	18701503
P35222	DEG_SCF_TRCP1_1	32	37	p.G34E	1184163	central_nervous_system	primitive_neuroectodermal_tumour-medulloblastoma	16567768
P35222	DEG_SCF_TRCP1_1	32	37	p.G34E	864377	liver	carcinoma	15067328
P35222	DEG_SCF_TRCP1_1	32	37	p.G34E	871521	endometrium	carcinoma	10671680
P35222	DEG_SCF_TRCP1_1	32	37	p.G34E	1752565	central_nervous_system	primitive_neuroectodermal_tumour-medulloblastoma	22832581
P35222	DEG_SCF_TRCP1_1	32	37	p.G34E	874764	liver	carcinoma	12845670
P35222	DEG_SCF_TRCP1_1	32	37	p.G34E	876575	liver	other	11666046
P35222	DEG_SCF_TRCP1_1	32	37	p.G34E	1783328	endometrium	carcinoma
P35222	DEG_SCF_TRCP1_1	32	37	p.G34E	873170	liver	carcinoma	10487827
P35222	DEG_SCF_TRCP1_1	32	37	p.G34E	1423765	lung	carcinoma	18948947
P35222	DEG_SCF_TRCP1_1	32	37	p.G34E	876529	stomach	adenoma	11238048
P35222	DEG_SCF_TRCP1_1	32	37	p.G34E	906790	stomach	carcinoma
P35222	DEG_SCF_TRCP1_1	32	37	p.G34E	1752592	central_nervous_system	primitive_neuroectodermal_tumour-medulloblastoma	22832581
P35222	DEG_SCF_TRCP1_1	32	37	p.G34E	1041549	central_nervous_system	primitive_neuroectodermal_tumour-medulloblastoma	16258095
P35222	DEG_SCF_TRCP1_1	32	37	p.G34E	875262	ovary	carcinoma	11719457
P35222	DEG_SCF_TRCP1_1	32	37	p.G34E	864372	liver	carcinoma	15067328
P35222	DEG_SCF_TRCP1_1	32	37	p.G34E	876315	endometrium	carcinoma	11161379
P35222	DEG_SCF_TRCP1_1	32	37	p.G34E	868680	skin	adnexal_tumour	10192393
P35222	DEG_SCF_TRCP1_1	32	37	p.G34E	1752591	central_nervous_system	primitive_neuroectodermal_tumour-medulloblastoma	22832581
P35222	DEG_SCF_TRCP1_1	32	37	p.G34E	876530	stomach	adenoma	11238048
P35222	DEG_SCF_TRCP1_1	32	37	p.G34E	1071837	central_nervous_system	primitive_neuroectodermal_tumour-medulloblastoma	17172831
P35222	DEG_SCF_TRCP1_1	32	37	p.G34E	1816252	stomach	carcinoma	23196062
P35222	DEG_SCF_TRCP1_1	32	37	p.G34E	869164	liver	carcinoma	9671767
P35222	DEG_SCF_TRCP1_1	32	37	p.S37C	1745418	endometrium	carcinoma	22635024
P35222	DEG_SCF_TRCP1_1	32	37	p.G34E	1042498	liver	other	16496320
P35222	DEG_SCF_TRCP1_1	32	37	p.G34E	868476	large_intestine	adenoma	10197610
P35222	DEG_SCF_TRCP1_1	32	37	p.G34E	877598	endometrium	carcinoma	11329142
P35222	DEG_SCF_TRCP1_1	32	37	p.G34E	872212	liver	other	10698519
P35222	DEG_SCF_TRCP1_1	32	37	p.G34E	1063899	central_nervous_system	primitive_neuroectodermal_tumour-medulloblastoma	16685513
P35222	DEG_SCF_TRCP1_1	32	37	p.G34E	1919151	liver	carcinoma
P35222	DEG_SCF_TRCP1_1	32	37	p.G34E	1550289	liver	carcinoma	21457159
P35222	DEG_SCF_TRCP1_1	32	37	p.G34E	1184021	central_nervous_system	primitive_neuroectodermal_tumour-medulloblastoma	18769486
P35222	DEG_SCF_TRCP1_1	32	37	p.G34E	876531	stomach	adenoma	11238048
P35222	DEG_SCF_TRCP1_1	32	37	p.G34E	873139	large_intestine	carcinoma	10493496
P35222	DEG_SCF_TRCP1_1	32	37	p.G34E	873146	large_intestine	carcinoma	10493496
P35222	DEG_SCF_TRCP1_1	32	37	p.G34E	873729	endometrium	carcinoma	12708483
P35222	DEG_SCF_TRCP1_1	32	37	p.G34E	877603	endometrium	carcinoma	11329142
P35222	DEG_SCF_TRCP1_1	32	37	p.G34E	868678	skin	adnexal_tumour	10192393
P35222	DEG_SCF_TRCP1_1	32	37	p.G34E	1627261	stomach	carcinoma	22290393
P35222	DEG_SCF_TRCP1_1	32	37	p.G34E	876532	stomach	adenoma	11238048
P35222	DEG_SCF_TRCP1_1	32	37	p.G34E	915496	skin	adnexal_tumour	15606674
P35222	DEG_SCF_TRCP1_1	32	37	p.G34E	867676	endometrium	carcinoma	11957146
P35222	DEG_SCF_TRCP1_1	32	37	p.G34E	876642	liver	other	11309340
P35222	DEG_SCF_TRCP1_1	32	37	p.G34E	877641	ovary	carcinoma	11329142
P35222	DEG_SCF_TRCP1_1	32	37	p.G34E	873169	liver	carcinoma	10487827
P35222	DEG_SCF_TRCP1_1	32	37	p.G34E	876570	liver	other	11666046
P35222	DEG_SCF_TRCP1_1	32	37	p.G34E	1752570	central_nervous_system	primitive_neuroectodermal_tumour-medulloblastoma	22832581
P35222	DEG_SCF_TRCP1_1	32	37	p.G34E	1550293	liver	carcinoma	21457159
P35222	DEG_SCF_TRCP1_1	32	37	p.S37C	1622823	adrenal_gland	adrenal_cortical_adenoma	21733995
P35222	DEG_SCF_TRCP1_1	32	37	p.G34E	1041962	endometrium	hyperplasia	16160475
P35222	DEG_SCF_TRCP1_1	32	37	p.G34E	1172578	prostate	carcinoma	18514389
P35222	DEG_SCF_TRCP1_1	32	37	p.G34E	871781	liver	carcinoma	10980116
P35222	DEG_SCF_TRCP1_1	32	37	p.G34E	1598001	central_nervous_system	primitive_neuroectodermal_tumour-medulloblastoma	20921458
P35222	DEG_SCF_TRCP1_1	32	37	p.G34E	871436	liver	carcinoma	10700176
P35222	DEG_SCF_TRCP1_1	32	37	p.G34E	868679	skin	adnexal_tumour	10192393
P35222	DEG_SCF_TRCP1_1	32	37	p.H36P	1566729	liver	carcinoma	21822264
P35222	DEG_SCF_TRCP1_1	32	37	p.H36P	1566762	liver	carcinoma	21822264
P35222	DEG_SCF_TRCP1_1	32	37	p.H36P	1713792	liver	carcinoma	22561517
P35222	DEG_SCF_TRCP1_1	32	37	p.H36P	1919231	liver	carcinoma
P35222	DEG_SCF_TRCP1_1	32	37	p.H36P	1073413	liver	carcinoma	17187432
P35222	DEG_SCF_TRCP1_1	32	37	p.H36P	1714082	kidney	Wilms_tumour	22470196
P35222	DEG_SCF_TRCP1_1	32	37	p.H36P	1919166	liver	carcinoma
P35222	DEG_SCF_TRCP1_1	32	37	p.H36P	1919187	liver	carcinoma
P35222	DEG_SCF_TRCP1_1	32	37	p.H36P	870483	liver	carcinoma	11443619
P35222	DEG_SCF_TRCP1_1	32	37	p.H36P	871810	liver	carcinoma	10980116
P35222	DEG_SCF_TRCP1_1	32	37	p.H36P	1714058	kidney	Wilms_tumour	22470196
P35222	DEG_SCF_TRCP1_1	32	37	p.H36P	874775	liver	carcinoma	12845670
P35222	DEG_SCF_TRCP1_1	32	37	p.H36P	873166	liver	carcinoma	10487827
P35222	DEG_SCF_TRCP1_1	32	37	p.H36P	1714149	kidney	Wilms_tumour	22470196
P35222	DEG_SCF_TRCP1_1	32	37	p.H36P	1919218	liver	carcinoma
P35222	DEG_SCF_TRCP1_1	32	37	p.H36P	1127370	liver	carcinoma	18282277
P35222	DEG_SCF_TRCP1_1	32	37	p.H36P	1130546	liver	carcinoma	17510384
P35222	DEG_SCF_TRCP1_1	32	37	p.H36P	877719	liver	carcinoma	11375957
P35222	DEG_SCF_TRCP1_1	32	37	p.H36P	1919220	liver	carcinoma
P35222	DEG_SCF_TRCP1_1	32	37	p.H36P	1073415	liver	carcinoma	17187432
P35222	DEG_SCF_TRCP1_1	32	37	p.H36P	872399	kidney	Wilms_tumour	11103785
P35222	DEG_SCF_TRCP1_1	32	37	p.H36P	1713762	liver	carcinoma	22561517
P35222	DEG_SCF_TRCP1_1	32	37	p.H36P	1714108	kidney	Wilms_tumour	22470196
P35222	DEG_SCF_TRCP1_1	32	37	p.H36P	1550288	liver	carcinoma	21457159
P35222	DEG_SCF_TRCP1_1	32	37	p.H36P	871809	liver	carcinoma	10980116
P35222	DEG_SCF_TRCP1_1	32	37	p.H36P	1919190	liver	carcinoma
P35222	DEG_SCF_TRCP1_1	32	37	p.H36P	872400	kidney	Wilms_tumour	11103785
P35222	DEG_SCF_TRCP1_1	32	37	p.H36P	1040845	large_intestine	carcinoma	15647192
P35222	DEG_SCF_TRCP1_1	32	37	p.H36P	871470	liver	carcinoma	10700176
P35222	DEG_SCF_TRCP1_1	32	37	p.H36P	1127371	liver	carcinoma	18282277
P35222	DEG_SCF_TRCP1_1	32	37	p.D32G	1479465	central_nervous_system	primitive_neuroectodermal_tumour-medulloblastoma	21150899
P35222	DEG_SCF_TRCP1_1	32	37	p.D32G	1589194	liver	other	19061838
P35222	DEG_SCF_TRCP1_1	32	37	p.D32G	1198277	liver	other	19200579
P35222	DEG_SCF_TRCP1_1	32	37	p.D32G	1597962	liver	carcinoma	20923573
P35222	DEG_SCF_TRCP1_1	32	37	p.S33Y	1198298	liver	other	19200579
P35222	DEG_SCF_TRCP1_1	32	37	p.S33Y	1479466	central_nervous_system	primitive_neuroectodermal_tumour-medulloblastoma	21150899
P35222	DEG_SCF_TRCP1_1	32	37	p.H36P	1129664	kidney	Wilms_tumour	18464243
P35222	DEG_SCF_TRCP1_1	32	37	p.H36P	1045282	kidney	Wilms_tumour	17204608
P35222	DEG_SCF_TRCP1_1	32	37	p.G34R	1918807	liver	carcinoma
P35222	DEG_SCF_TRCP1_1	32	37	p.G34R	869448	soft_tissue	juvenile_angiofibroma	11238055
P35222	DEG_SCF_TRCP1_1	32	37	p.G34R	1919184	liver	carcinoma
P35222	DEG_SCF_TRCP1_1	32	37	p.H36P	1304105	adrenal_gland	adrenal_cortical_carcinoma	19498322
P35222	DEG_SCF_TRCP1_1	32	37	p.G34R	1042808	pancreas	carcinoma	16523258
P35222	DEG_SCF_TRCP1_1	32	37	p.G34R	871807	liver	carcinoma	10980116
P35222	DEG_SCF_TRCP1_1	32	37	p.G34R	873691	stomach	adenoma	11956818
P35222	DEG_SCF_TRCP1_1	32	37	p.G34R	875456	bone	calcifying_odontogenic_cyst	14578169
P35222	DEG_SCF_TRCP1_1	32	37	p.G34R	1197870	central_nervous_system	primitive_neuroectodermal_tumour-medulloblastoma	19293793
P35222	DEG_SCF_TRCP1_1	32	37	p.G34R	871806	liver	carcinoma	10980116
P35222	DEG_SCF_TRCP1_1	32	37	p.G34R	869454	soft_tissue	juvenile_angiofibroma	11238055
P35222	DEG_SCF_TRCP1_1	32	37	p.G34R	1753942	pituitary	craniopharyngioma	21562037
P35222	DEG_SCF_TRCP1_1	32	37	p.G34R	871805	liver	carcinoma	10980116
P35222	DEG_SCF_TRCP1_1	32	37	p.G34R	1753958	pituitary	craniopharyngioma	21562037
P35222	DEG_SCF_TRCP1_1	32	37	p.G34R	871780	liver	carcinoma	10980116
P35222	DEG_SCF_TRCP1_1	32	37	p.G34R	875247	ovary	carcinoma	11719457
P35222	DEG_SCF_TRCP1_1	32	37	p.G34R	1042813	pancreas	carcinoma	16523258
P35222	DEG_SCF_TRCP1_1	32	37	p.G34R	1783351	endometrium	carcinoma
P35222	DEG_SCF_TRCP1_1	32	37	p.G34R	1735473	central_nervous_system	primitive_neuroectodermal_tumour-medulloblastoma	22820256
P35222	DEG_SCF_TRCP1_1	32	37	p.S33F	869051	prostate	carcinoma	9635571
P35222	DEG_SCF_TRCP1_1	32	37	p.S33F	1512990	central_nervous_system	primitive_neuroectodermal_tumour-medulloblastoma	21163964
P35222	DEG_SCF_TRCP1_1	32	37	p.S33F	878135	liver	other	12101426
P35222	DEG_SCF_TRCP1_1	32	37	p.S33F	871237	central_nervous_system	primitive_neuroectodermal_tumour-medulloblastoma	10759189
P35222	DEG_SCF_TRCP1_1	32	37	p.S33F	1130544	liver	carcinoma	17510384
P35222	DEG_SCF_TRCP1_1	32	37	p.S33F	868034	thyroid	carcinoma	10213482
P35222	DEG_SCF_TRCP1_1	32	37	p.S33F	873687	stomach	adenoma	11956818
P35222	DEG_SCF_TRCP1_1	32	37	p.S33F	1839742	central_nervous_system	primitive_neuroectodermal_tumour-medulloblastoma	23278988
P35222	DEG_SCF_TRCP1_1	32	37	p.S33F	1513021	central_nervous_system	primitive_neuroectodermal_tumour-medulloblastoma	21163964
P35222	DEG_SCF_TRCP1_1	32	37	p.S33F	1566797	liver	carcinoma	21822264
P35222	DEG_SCF_TRCP1_1	32	37	p.S33F	1783340	endometrium	carcinoma
P35222	DEG_SCF_TRCP1_1	32	37	p.S33F	1131740	ovary	carcinoma	17418409
P35222	DEG_SCF_TRCP1_1	32	37	p.S33F	915503	skin	adnexal_tumour	15606674
P35222	DEG_SCF_TRCP1_1	32	37	p.S33F	873049	liver	carcinoma	10597262
P35222	DEG_SCF_TRCP1_1	32	37	p.S33F	1042392	ovary	low_malignant_potential_(borderline)_tumour	16429393
P35222	DEG_SCF_TRCP1_1	32	37	p.S33F	1472666	central_nervous_system	primitive_neuroectodermal_tumour-medulloblastoma	21060032
P35222	DEG_SCF_TRCP1_1	32	37	p.S33F	1753950	pituitary	craniopharyngioma	21562037
P35222	DEG_SCF_TRCP1_1	32	37	p.S33F	1713755	liver	carcinoma	22561517
P35222	DEG_SCF_TRCP1_1	32	37	p.S33F	1097400	endometrium	carcinoma	18084252
P35222	DEG_SCF_TRCP1_1	32	37	p.S33F	874897	pituitary	craniopharyngioma	12466115
P35222	DEG_SCF_TRCP1_1	32	37	p.S33F	874778	liver	carcinoma	12845670
P35222	DEG_SCF_TRCP1_1	32	37	p.S33F	872234	central_nervous_system	primitive_neuroectodermal_tumour-medulloblastoma	10666372
P35222	DEG_SCF_TRCP1_1	32	37	p.S33F	1752605	central_nervous_system	primitive_neuroectodermal_tumour-medulloblastoma	22832581
P35222	DEG_SCF_TRCP1_1	32	37	p.S33F	1898094	urinary_tract	carcinoma
P35222	DEG_SCF_TRCP1_1	32	37	p.S33F	875461	bone	calcifying_odontogenic_cyst	14578169
P35222	DEG_SCF_TRCP1_1	32	37	p.S33F	869055	prostate	carcinoma	9635571
P35222	DEG_SCF_TRCP1_1	32	37	p.S33F	1063897	central_nervous_system	primitive_neuroectodermal_tumour-medulloblastoma	16685513
P35222	DEG_SCF_TRCP1_1	32	37	p.S33F	1127632	liver	carcinoma	18467159
P35222	DEG_SCF_TRCP1_1	32	37	p.S33F	1513015	central_nervous_system	primitive_neuroectodermal_tumour-medulloblastoma	21163964
P35222	DEG_SCF_TRCP1_1	32	37	p.S33F	1530263	lung	carcinoma	21292787
P35222	DEG_SCF_TRCP1_1	32	37	p.S33F	915491	skin	adnexal_tumour	15606674
P35222	DEG_SCF_TRCP1_1	32	37	p.S33F	868674	skin	adnexal_tumour	10192393
P35222	DEG_SCF_TRCP1_1	32	37	p.S33F	1042597	skin	adnexal_tumour	16378715
P35222	DEG_SCF_TRCP1_1	32	37	p.S33F	1173805	liver	carcinoma	18701503
P35222	DEG_SCF_TRCP1_1	32	37	p.S33F	1472660	central_nervous_system	primitive_neuroectodermal_tumour-medulloblastoma	21060032
P35222	DEG_SCF_TRCP1_1	32	37	p.S33F	1127633	liver	carcinoma	18467159
P35222	DEG_SCF_TRCP1_1	32	37	p.S33F	915505	skin	adnexal_tumour	15606674
P35222	DEG_SCF_TRCP1_1	32	37	p.S33F	1472643	central_nervous_system	primitive_neuroectodermal_tumour-medulloblastoma	21060032
P35222	DEG_SCF_TRCP1_1	32	37	p.S33F	1041972	endometrium	hyperplasia	16160475
P35222	DEG_SCF_TRCP1_1	32	37	p.S33F	876006	stomach	carcinoma	11163116
P35222	DEG_SCF_TRCP1_1	32	37	p.S33F	1732873	central_nervous_system	primitive_neuroectodermal_tumour-medulloblastoma	22722829
P35222	DEG_SCF_TRCP1_1	32	37	p.S33F	1669773	pancreas	carcinoma	21769465
P35222	DEG_SCF_TRCP1_1	32	37	p.S33F	871236	central_nervous_system	primitive_neuroectodermal_tumour-medulloblastoma	10759189
P35222	DEG_SCF_TRCP1_1	32	37	p.S33F	872232	central_nervous_system	primitive_neuroectodermal_tumour-medulloblastoma	10666372
P35222	DEG_SCF_TRCP1_1	32	37	p.S33F	1652902	central_nervous_system	primitive_neuroectodermal_tumour-medulloblastoma	22832583
P35222	DEG_SCF_TRCP1_1	32	37	p.S33F	1735433	central_nervous_system	primitive_neuroectodermal_tumour-medulloblastoma	22820256
P35222	DEG_SCF_TRCP1_1	32	37	p.S33F	870353	central_nervous_system	primitive_neuroectodermal_tumour-medulloblastoma	11433413
P35222	DEG_SCF_TRCP1_1	32	37	p.S33F	873443	endometrium	carcinoma	12439748
P35222	DEG_SCF_TRCP1_1	32	37	p.S33F	915492	skin	adnexal_tumour	15606674
P35222	DEG_SCF_TRCP1_1	32	37	p.S33F	1783361	endometrium	carcinoma
P35222	DEG_SCF_TRCP1_1	32	37	p.S33F	915497	skin	adnexal_tumour	15606674
P35222	DEG_SCF_TRCP1_1	32	37	p.S33F	873683	stomach	adenoma	11956818
P35222	DEG_SCF_TRCP1_1	32	37	p.S33F	873047	liver	carcinoma	10597262
P35222	DEG_SCF_TRCP1_1	32	37	p.S33F	1752601	central_nervous_system	primitive_neuroectodermal_tumour-medulloblastoma	22832581
P35222	DEG_SCF_TRCP1_1	32	37	p.S33F	1042595	skin	adnexal_tumour	16378715
P35222	DEG_SCF_TRCP1_1	32	37	p.S33F	1063895	central_nervous_system	primitive_neuroectodermal_tumour-medulloblastoma	16685513
P35222	DEG_SCF_TRCP1_1	32	37	p.S33F	1042602	skin	adnexal_tumour	16378715
P35222	DEG_SCF_TRCP1_1	32	37	p.S33F	1839741	central_nervous_system	primitive_neuroectodermal_tumour-medulloblastoma	23278988
P35222	DEG_SCF_TRCP1_1	32	37	p.S33F	1752604	central_nervous_system	primitive_neuroectodermal_tumour-medulloblastoma	22832581
P35222	DEG_SCF_TRCP1_1	32	37	p.S33F	1919208	liver	carcinoma
P35222	DEG_SCF_TRCP1_1	32	37	p.S33F	1652853	central_nervous_system	primitive_neuroectodermal_tumour-medulloblastoma	22832583
P35222	DEG_SCF_TRCP1_1	32	37	p.S33F	1783317	endometrium	carcinoma
P35222	DEG_SCF_TRCP1_1	32	37	p.S33F	867681	endometrium	carcinoma	11957146
P35222	DEG_SCF_TRCP1_1	32	37	p.S33F	877644	ovary	carcinoma	11329142
P35222	DEG_SCF_TRCP1_1	32	37	p.S33F	868688	ovary	carcinoma	10417756
P35222	DEG_SCF_TRCP1_1	32	37	p.S33F	1598018	central_nervous_system	primitive_neuroectodermal_tumour-medulloblastoma	20921458
P35222	DEG_SCF_TRCP1_1	32	37	p.S33F	868984	endometrium	carcinoma	9721853
P35222	DEG_SCF_TRCP1_1	32	37	p.S33F	873766	skin	adnexal_tumour	12575848
P35222	DEG_SCF_TRCP1_1	32	37	p.S33F	1472662	central_nervous_system	primitive_neuroectodermal_tumour-medulloblastoma	21060032
P35222	DEG_SCF_TRCP1_1	32	37	p.S33F	1783525	endometrium	carcinoma
P35222	DEG_SCF_TRCP1_1	32	37	p.S33F	1839740	central_nervous_system	primitive_neuroectodermal_tumour-medulloblastoma	23278988
P35222	DEG_SCF_TRCP1_1	32	37	p.S33F	1073412	liver	carcinoma	17187432
P35222	DEG_SCF_TRCP1_1	32	37	p.S33F	1783489	endometrium	carcinoma
P35222	DEG_SCF_TRCP1_1	32	37	p.S33F	874896	pituitary	craniopharyngioma	12466115
P35222	DEG_SCF_TRCP1_1	32	37	p.S33F	1783319	endometrium	carcinoma
P35222	DEG_SCF_TRCP1_1	32	37	p.S33F	1042594	skin	adnexal_tumour	16378715
P35222	DEG_SCF_TRCP1_1	32	37	p.S33F	876524	stomach	adenoma	11238048
P35222	DEG_SCF_TRCP1_1	32	37	p.S33F	1173747	liver	carcinoma	18701503
P35222	DEG_SCF_TRCP1_1	32	37	p.S33F	1629202	pituitary	craniopharyngioma	22086512
P35222	DEG_SCF_TRCP1_1	32	37	p.S33F	1042760	pancreas	carcinoma	16967453
P35222	DEG_SCF_TRCP1_1	32	37	p.S33F	1509113	central_nervous_system	primitive_neuroectodermal_tumour-medulloblastoma	21358093
P35222	DEG_SCF_TRCP1_1	32	37	p.S33F	1172557	haematopoietic_and_lymphoid_tissue	lymphoid_neoplasm	18757411
P35222	DEG_SCF_TRCP1_1	32	37	p.S33F	979087	kidney	Wilms_tumour	15579438
P35222	DEG_SCF_TRCP1_1	32	37	p.S33F	868058	liver	carcinoma	11375957
P35222	DEG_SCF_TRCP1_1	32	37	p.S33F	874898	pituitary	craniopharyngioma	12466115
P35222	DEG_SCF_TRCP1_1	32	37	p.S33F	876525	stomach	adenoma	11238048
P35222	DEG_SCF_TRCP1_1	32	37	p.S33F	1065211	ovary	carcinoma	17258789
P35222	DEG_SCF_TRCP1_1	32	37	p.S33F	915506	skin	adnexal_tumour	15606674
P35222	DEG_SCF_TRCP1_1	32	37	p.S33F	1752607	central_nervous_system	primitive_neuroectodermal_tumour-medulloblastoma	22832581
P35222	DEG_SCF_TRCP1_1	32	37	p.S33F	872233	central_nervous_system	primitive_neuroectodermal_tumour-medulloblastoma	10666372
P35222	DEG_SCF_TRCP1_1	32	37	p.S33F	873333	urinary_tract	carcinoma	12394763
P35222	DEG_SCF_TRCP1_1	32	37	p.S33F	873652	stomach	adenoma	11956818
P35222	DEG_SCF_TRCP1_1	32	37	p.S33F	1752589	central_nervous_system	primitive_neuroectodermal_tumour-medulloblastoma	22832581
P35222	DEG_SCF_TRCP1_1	32	37	p.S33F	1063896	central_nervous_system	primitive_neuroectodermal_tumour-medulloblastoma	16685513
P35222	DEG_SCF_TRCP1_1	32	37	p.S33F	1513011	central_nervous_system	primitive_neuroectodermal_tumour-medulloblastoma	21163964
P35222	DEG_SCF_TRCP1_1	32	37	p.S33F	1598005	central_nervous_system	primitive_neuroectodermal_tumour-medulloblastoma	20921458
P35222	DEG_SCF_TRCP1_1	32	37	p.S33F	868675	skin	adnexal_tumour	10192393
P35222	DEG_SCF_TRCP1_1	32	37	p.S33F	1753943	pituitary	craniopharyngioma	21562037
P35222	DEG_SCF_TRCP1_1	32	37	p.S33F	724878	lung	carcinoma
P35222	DEG_SCF_TRCP1_1	32	37	p.S33F	876526	stomach	adenoma	11238048
P35222	DEG_SCF_TRCP1_1	32	37	p.S33F	1472678	central_nervous_system	primitive_neuroectodermal_tumour-medulloblastoma	21060032
P35222	DEG_SCF_TRCP1_1	32	37	p.S33F	874772	liver	carcinoma	12845670
P35222	DEG_SCF_TRCP1_1	32	37	p.S33F	1839739	central_nervous_system	primitive_neuroectodermal_tumour-medulloblastoma	23278988
P35222	DEG_SCF_TRCP1_1	32	37	p.H36R	1129680	kidney	Wilms_tumour	18464243
P35222	DEG_SCF_TRCP1_1	32	37	p.D32V	1589260	liver	other	19061838
P35222	DEG_SCF_TRCP1_1	32	37	p.D32V	1622607	liver	other	21992464
P35222	DEG_SCF_TRCP1_1	32	37	p.D32V	1622599	liver	other	21992464
P35222	DEG_SCF_TRCP1_1	32	37	p.D32V	1622600	liver	other	21992464
P35222	DEG_SCF_TRCP1_1	32	37	p.D32V	1589261	liver	other	19061838
P35222	DEG_SCF_TRCP1_1	32	37	p.D32V	869162	liver	carcinoma	9671767
P35222	DEG_SCF_TRCP1_1	32	37	p.D32V	1622603	liver	other	21992464
P35222	DEG_SCF_TRCP1_1	32	37	p.D32V	1622816	liver	other	22183980
P35222	DEG_SCF_TRCP1_1	32	37	p.S33L	869472	biliary_tract	other	11196159
P35222	DEG_SCF_TRCP1_1	32	37	p.S33L	869473	biliary_tract	other	11196159
P35222	DEG_SCF_TRCP1_1	32	37	p.S33L	868059	liver	carcinoma	11375957
P35222	DEG_SCF_TRCP1_1	32	37	p.S33L	1073406	liver	carcinoma	17187432
P35222	DEG_SCF_TRCP1_1	32	37	p.S33F	1621755	adrenal_gland	adrenal_cortical_neoplasm	21849527
P35222	DEG_SCF_TRCP1_1	32	37	p.S33F	1198275	liver	other	19200579
P35222	DEG_SCF_TRCP1_1	32	37	p.S33F	1191860	central_nervous_system	primitive_neuroectodermal_tumour-medulloblastoma	19197950
P35222	DEG_SCF_TRCP1_1	32	37	p.S33F	1191864	central_nervous_system	primitive_neuroectodermal_tumour-medulloblastoma	19197950
P35222	DEG_SCF_TRCP1_1	32	37	p.S33F	1191861	central_nervous_system	primitive_neuroectodermal_tumour-medulloblastoma	19197950
P35222	DEG_SCF_TRCP1_1	32	37	p.S33F	948866	pancreas	other	11696422
P04637	TRG_NLS_Bipartite_1	305	323	p.N310L	1383298	upper_aerodigestive_tract	carcinoma	10225439
P04637	TRG_NLS_Bipartite_1	305	323	p.P309R	1395859	upper_aerodigestive_tract	carcinoma	14719105
P04637	TRG_NLS_Bipartite_1	305	323	p.P309S	1413689	large_intestine	carcinoma	15251969
P04637	TRG_NLS_Bipartite_1	305	323	p.S315C	1383296	upper_aerodigestive_tract	carcinoma	10225439
P04637	TRG_NLS_Bipartite_1	305	323	p.Q317R	1651258	large_intestine	carcinoma
P04637	TRG_NLS_Bipartite_1	305	323	p.Q317R	1651258	large_intestine	carcinoma
P04637	TRG_NLS_Bipartite_1	305	323	p.Q317R	1418089	bone	osteosarcoma	12181274
P04637	TRG_NLS_Bipartite_1	305	323	p.Q317R	1422636	ovary	carcinoma	16183105
P04637	TRG_NLS_Bipartite_1	305	323	p.L323G	1383275	upper_aerodigestive_tract	carcinoma	10225439
P04637	TRG_NLS_Bipartite_1	305	323	p.P309S	905962	large_intestine	carcinoma	17088437
P04637	TRG_NLS_Bipartite_1	305	323	p.K305E	1406628	haematopoietic_and_lymphoid_tissue	lymphoid_neoplasm	8916968
P04637	TRG_NLS_Bipartite_1	305	323	p.L323R	1383274	upper_aerodigestive_tract	carcinoma	10225439
P04637	TRG_NLS_Bipartite_1	305	323	p.P309S	1383274	upper_aerodigestive_tract	carcinoma	10225439
P04637	TRG_NLS_Bipartite_1	305	323	p.Q317P	1390764	urinary_tract	carcinoma	7957118
P04637	TRG_NLS_Bipartite_1	305	323	p.L308V	1422610	ovary	carcinoma	16183105
P04637	TRG_NLS_Bipartite_1	305	323	p.T312A	1360559	large_intestine	carcinoma	17259658
P04637	TRG_NLS_Bipartite_1	305	323	p.L323V	1422604	ovary	carcinoma	16183105
P04637	TRG_NLS_Bipartite_1	305	323	p.S313G	1651307	large_intestine	carcinoma
P04637	TRG_NLS_Bipartite_1	305	323	p.A307T	1412959	oesophagus	other	11232646
P04637	TRG_NLS_Bipartite_1	305	323	p.A307T	1413452	upper_aerodigestive_tract	carcinoma	16024113
P04637	TRG_NLS_Bipartite_1	305	323	p.N310D	1651147	large_intestine	carcinoma
P04637	TRG_NLS_Bipartite_1	305	323	p.N310D	1651554	large_intestine	carcinoma
P04637	TRG_NLS_Bipartite_1	305	323	p.L323M	1369372	liver	carcinoma	14499690
P04637	TRG_NLS_Bipartite_1	305	323	p.P316L	1838364	skin	malignant_melanoma	22817889
P04637	TRG_NLS_Bipartite_1	305	323	p.P316L	1395226	upper_aerodigestive_tract	carcinoma	11325447
P04637	TRG_NLS_Bipartite_1	305	323	p.N311D	1651522	large_intestine	carcinoma
P04637	TRG_NLS_Bipartite_1	305	323	p.A307V	1287279	central_nervous_system	glioma	18772890
P04637	TRG_NLS_Bipartite_1	305	323	p.P316L	1838364	skin	malignant_melanoma	22817889
P04637	TRG_NLS_Bipartite_1	305	323	p.S315P	1651296	large_intestine	carcinoma
P04637	TRG_NLS_Bipartite_1	305	323	p.S315P	1651227	large_intestine	carcinoma
P04637	TRG_NLS_Bipartite_1	305	323	p.P322L	1374295	skin	other	14962108
P04637	TRG_NLS_Bipartite_1	305	323	p.P322L	1375681	peritoneum	carcinoma	10728699
P04637	TRG_NLS_Bipartite_1	305	323	p.T312I	1413189	urinary_tract	carcinoma	16061860
P04637	TRG_NLS_Bipartite_1	305	323	p.Q317K	1361584	large_intestine	carcinoma	11241240
P04637	TRG_NLS_Bipartite_1	305	323	p.Q317K	1361585	large_intestine	carcinoma	11241240
P04637	TRG_NLS_Bipartite_1	305	323	p.Q317K	1359459	endometrium	carcinoma	16174251
P04637	TRG_NLS_Bipartite_1	305	323	p.K319N	1691018	urinary_tract	carcinoma	22493262
P04637	TRG_NLS_Bipartite_1	305	323	p.K319N	1359889	lung	carcinoma	9846966
P04637	TRG_NLS_Bipartite_1	305	323	p.K319E	1362530	upper_aerodigestive_tract	carcinoma	11948487
P04637	TRG_NLS_Bipartite_1	305	323	p.K305T	1396833	oesophagus	other	17849424
P04637	TRG_NLS_Bipartite_1	305	323	p.K319E	1401418	skin	carcinoma	11981662
P04637	TRG_NLS_Bipartite_1	305	323	p.K305N	1390666	oesophagus	carcinoma	10223186
P04637	TRG_NLS_Bipartite_1	305	323	p.S314F	1408789	liver	carcinoma	15017592
P04637	TRG_NLS_Bipartite_1	305	323	p.N311H	1395864	upper_aerodigestive_tract	carcinoma	14719105
P04637	TRG_NLS_Bipartite_1	305	323	p.P318A	1360562	large_intestine	carcinoma	17259658
P04637	TRG_NLS_Bipartite_1	305	323	p.P318A	1360541	large_intestine	carcinoma	17259658
P04637	TRG_NLS_Bipartite_1	305	323	p.S315P	1413194	urinary_tract	carcinoma	16061860
P04637	TRG_NLS_Bipartite_1	305	323	p.S315P	1651296	large_intestine	carcinoma
P04637	TRG_NLS_Bipartite_1	305	323	p.S315P	1651227	large_intestine	carcinoma
P04637	TRG_NLS_Bipartite_1	305	323	p.T312S	1381029	haematopoietic_and_lymphoid_tissue	lymphoid_neoplasm	8182933
P04637	TRG_NLS_Bipartite_1	305	323	p.L308M	1369372	liver	carcinoma	14499690
P04637	TRG_NLS_Bipartite_1	305	323	p.T312S	1422631	ovary	carcinoma	16183105
P04637	TRG_NLS_Bipartite_1	305	323	p.T312S	1383294	upper_aerodigestive_tract	carcinoma	10225439
P04637	TRG_NLS_Bipartite_1	305	323	p.L308M	1373095	upper_aerodigestive_tract	carcinoma	10754498
P04637	TRG_NLS_Bipartite_1	305	323	p.S313C	1379520	lung	carcinoma	10582680
P04637	TRG_NLS_Bipartite_1	305	323	p.K319R	1651195	large_intestine	carcinoma
P04637	TRG_NLS_Bipartite_1	305	323	p.K319R	1395862	upper_aerodigestive_tract	carcinoma	14719105
P04637	TRG_NLS_Bipartite_1	305	323	p.S313N	1371271	central_nervous_system	glioma	8674005
P04637	TRG_NLS_Bipartite_1	305	323	p.K305N	1651299	large_intestine	carcinoma
P04637	TRG_NLS_Bipartite_1	305	323	p.K305N	1402778	haematopoietic_and_lymphoid_tissue	lymphoid_neoplasm	15370252
P04637	TRG_NLS_Bipartite_1	305	323	p.K305N	1367547	upper_aerodigestive_tract	carcinoma	12404284
P04637	TRG_NLS_Bipartite_1	305	323	p.N311K	1422614	ovary	carcinoma	16183105
P04637	TRG_NLS_Bipartite_1	305	323	p.N310T	1383282	upper_aerodigestive_tract	carcinoma	10225439
P04637	TRG_NLS_Bipartite_1	305	323	p.N310T	1383277	upper_aerodigestive_tract	carcinoma	10225439
P04637	TRG_NLS_Bipartite_1	305	323	p.N310D	1677062	large_intestine	carcinoma	21901162
P04637	TRG_NLS_Bipartite_1	305	323	p.N310D	1651554	large_intestine	carcinoma
P04637	TRG_NLS_Bipartite_1	305	323	p.N310D	1651147	large_intestine	carcinoma
P04637	TRG_NLS_Bipartite_1	305	323	p.A307S	1393459	skin	malignant_melanoma	16094622
P04637	TRG_NLS_Bipartite_1	305	323	p.K319R	1651195	large_intestine	carcinoma
P04637	TRG_NLS_Bipartite_1	305	323	p.K305R	1359300	central_nervous_system	glioma	8240361
P04637	TRG_NLS_Bipartite_1	305	323	p.K305R	1410751	upper_aerodigestive_tract	carcinoma	10962443
P04637	TRG_NLS_Bipartite_1	305	323	p.L323P	1374284	skin	other	14962108
P04637	TRG_NLS_Bipartite_1	305	323	p.T312S	1396537	upper_aerodigestive_tract	carcinoma	10621852
P04637	TRG_NLS_Bipartite_1	305	323	p.N311D	1651522	large_intestine	carcinoma
P04637	TRG_NLS_Bipartite_1	305	323	p.P322R	1383292	upper_aerodigestive_tract	carcinoma	10225439
P04637	TRG_NLS_Bipartite_1	305	323	p.P322R	1383286	upper_aerodigestive_tract	carcinoma	10225439
P04637	TRG_NLS_Bipartite_1	305	323	p.K305N	1651299	large_intestine	carcinoma
P04637	TRG_NLS_Bipartite_1	305	323	p.S313G	1651307	large_intestine	carcinoma
P04637	TRG_NLS_Bipartite_1	305	323	p.K320N	753566	urinary_tract	carcinoma
P04637	TRG_NLS_Bipartite_1	305	323	p.K320N	753566	urinary_tract	carcinoma
P04637	TRG_NLS_Bipartite_1	305	323	p.K320N	753566	urinary_tract	carcinoma
P04637	TRG_NLS_Bipartite_1	305	323	p.K320N	1415940	breast	carcinoma	8156519
P04637	TRG_NLS_Bipartite_1	305	323	p.K320N	1422625	ovary	carcinoma	16183105
P04637	TRG_NES_CRM1_1	339	352	p.R342Q	1387875	upper_aerodigestive_tract	carcinoma	10499619
P04637	TRG_NES_CRM1_1	339	352	p.L344P	1509850	pancreas	carcinoma	18772397
P04637	TRG_NES_CRM1_1	339	352	p.E343G	1651009	large_intestine	carcinoma
P04637	TRG_NES_CRM1_1	339	352	p.L344P	1362528	upper_aerodigestive_tract	carcinoma	11948487
P04637	TRG_NES_CRM1_1	339	352	p.R342Q	1413411	upper_aerodigestive_tract	carcinoma	16024113
P04637	TRG_NES_CRM1_1	339	352	p.N345I	1846738	haematopoietic_and_lymphoid_tissue	lymphoid_neoplasm	22897847
P04637	TRG_NES_CRM1_1	339	352	p.M340V	1473045	pancreas	NS
P04637	TRG_NES_CRM1_1	339	352	p.F341L	1651320	large_intestine	carcinoma
P04637	TRG_NES_CRM1_1	339	352	p.K351E	1551805	skin	malignant_melanoma	21499247
P04637	TRG_NES_CRM1_1	339	352	p.A347T	1910237	central_nervous_system	glioma
P04637	TRG_NES_CRM1_1	339	352	p.A347T	1867793	central_nervous_system	glioma	23104868
P04637	TRG_NES_CRM1_1	339	352	p.E346A	1395608	upper_aerodigestive_tract	carcinoma	12649174
P04637	TRG_NES_CRM1_1	339	352	p.E346G	1651153	large_intestine	carcinoma
P04637	TRG_NES_CRM1_1	339	352	p.E349K	1651158	large_intestine	carcinoma
P04637	TRG_NES_CRM1_1	339	352	p.E349K	1651173	large_intestine	carcinoma
P04637	TRG_NES_CRM1_1	339	352	p.A347T	1867793	central_nervous_system	glioma	23104868
P04637	TRG_NES_CRM1_1	339	352	p.A347T	1337909	central_nervous_system	glioma	18772890
P04637	TRG_NES_CRM1_1	339	352	p.A347T	1399454	breast	carcinoma	15138567
P04637	TRG_NES_CRM1_1	339	352	p.A347T	1910237	central_nervous_system	glioma
P04637	TRG_NES_CRM1_1	339	352	p.E339Q	1416687	breast	carcinoma	16821082
P04637	TRG_NES_CRM1_1	339	352	p.E346G	1651153	large_intestine	carcinoma
P04637	TRG_NES_CRM1_1	339	352	p.A347G	1419178	central_nervous_system	glioma	9115587
P04637	TRG_NES_CRM1_1	339	352	p.E343G	1651009	large_intestine	carcinoma
P04637	TRG_NES_CRM1_1	339	352	p.L344P	1768336	pancreas	carcinoma	22991414
P04637	TRG_NES_CRM1_1	339	352	p.L348F	1419689	lung	carcinoma	8934544
P04637	TRG_NES_CRM1_1	339	352	p.L348F	1919162	liver	carcinoma
P04637	TRG_NES_CRM1_1	339	352	p.L348F	1475054	ovary	carcinoma	21720365
P04637	TRG_NES_CRM1_1	339	352	p.L348F	1782475	lung	carcinoma
P04637	TRG_NES_CRM1_1	339	352	p.L344R	1759420	lung	carcinoma	22941189
P04637	TRG_NES_CRM1_1	339	352	p.L344R	1418865	urinary_tract	carcinoma	21552959
P04637	TRG_NES_CRM1_1	339	352	p.F341S	1651175	large_intestine	carcinoma
P04637	TRG_NES_CRM1_1	339	352	p.E349K	1651158	large_intestine	carcinoma
P04637	TRG_NES_CRM1_1	339	352	p.E349K	1651173	large_intestine	carcinoma
P04637	TRG_NES_CRM1_1	339	352	p.F341L	1651320	large_intestine	carcinoma
P04637	TRG_NES_CRM1_1	339	352	p.F341C	1401458	prostate	carcinoma	16941491
P04637	TRG_NES_CRM1_1	339	352	p.R342P	1900009	breast	carcinoma
P04637	TRG_NES_CRM1_1	339	352	p.R342P	1387792	breast	carcinoma	8198984
P04637	TRG_NES_CRM1_1	339	352	p.R342P	1861127	endometrium	carcinoma	23104009
P04637	TRG_NES_CRM1_1	339	352	p.R342P	1398389	ovary	carcinoma	11244334
P04637	TRG_NES_CRM1_1	339	352	p.R342P	1398375	ovary	carcinoma	11244334
P04637	TRG_NES_CRM1_1	339	352	p.E339G	1651593	large_intestine	carcinoma
P04637	TRG_NES_CRM1_1	339	352	p.R342P	1861127	endometrium	carcinoma	23104009
P04637	TRG_NES_CRM1_1	339	352	p.R342P	1900009	breast	carcinoma
P04637	TRG_NES_CRM1_1	339	352	p.L348F	1919162	liver	carcinoma
P04637	TRG_NES_CRM1_1	339	352	p.L344R	1759420	lung	carcinoma	22941189
P04637	TRG_NES_CRM1_1	339	352	p.L348F	1782475	lung	carcinoma
P04637	TRG_NES_CRM1_1	339	352	p.M340I	1690979	urinary_tract	carcinoma	22493262
P04637	TRG_NES_CRM1_1	339	352	p.E339K	1413500	upper_aerodigestive_tract	carcinoma	16024113
P04637	TRG_NES_CRM1_1	339	352	p.N345I	1846738	haematopoietic_and_lymphoid_tissue	lymphoid_neoplasm	22897847
P04637	TRG_NES_CRM1_1	339	352	p.E339G	1651593	large_intestine	carcinoma
P04637	TRG_NES_CRM1_1	339	352	p.F341S	1651175	large_intestine	carcinoma
P04637	TRG_NES_CRM1_1	339	352	p.K351E	1551805	skin	malignant_melanoma	21499247
P04637	DOC_WW_Pin1_4	312	317	p.S315C	1383296	upper_aerodigestive_tract	carcinoma	10225439
P04637	DOC_WW_Pin1_4	312	317	p.Q317R	1651258	large_intestine	carcinoma
P04637	DOC_WW_Pin1_4	312	317	p.Q317R	1651258	large_intestine	carcinoma
P04637	DOC_WW_Pin1_4	312	317	p.Q317R	1418089	bone	osteosarcoma	12181274
P04637	DOC_WW_Pin1_4	312	317	p.Q317R	1422636	ovary	carcinoma	16183105
P04637	DOC_WW_Pin1_4	312	317	p.Q317P	1390764	urinary_tract	carcinoma	7957118
P04637	DOC_WW_Pin1_4	312	317	p.T312A	1360559	large_intestine	carcinoma	17259658
P04637	DOC_WW_Pin1_4	312	317	p.S313G	1651307	large_intestine	carcinoma
P04637	DOC_WW_Pin1_4	312	317	p.P316L	1838364	skin	malignant_melanoma	22817889
P04637	DOC_WW_Pin1_4	312	317	p.P316L	1395226	upper_aerodigestive_tract	carcinoma	11325447
P04637	DOC_WW_Pin1_4	312	317	p.P316L	1838364	skin	malignant_melanoma	22817889
P04637	DOC_WW_Pin1_4	312	317	p.S315P	1651296	large_intestine	carcinoma
P04637	DOC_WW_Pin1_4	312	317	p.S315P	1651227	large_intestine	carcinoma
P04637	DOC_WW_Pin1_4	312	317	p.T312I	1413189	urinary_tract	carcinoma	16061860
P04637	DOC_WW_Pin1_4	312	317	p.Q317K	1361584	large_intestine	carcinoma	11241240
P04637	DOC_WW_Pin1_4	312	317	p.Q317K	1361585	large_intestine	carcinoma	11241240
P04637	DOC_WW_Pin1_4	312	317	p.Q317K	1359459	endometrium	carcinoma	16174251
P04637	DOC_WW_Pin1_4	312	317	p.S314F	1408789	liver	carcinoma	15017592
P04637	DOC_WW_Pin1_4	312	317	p.S315P	1413194	urinary_tract	carcinoma	16061860
P04637	DOC_WW_Pin1_4	312	317	p.S315P	1651296	large_intestine	carcinoma
P04637	DOC_WW_Pin1_4	312	317	p.S315P	1651227	large_intestine	carcinoma
P04637	DOC_WW_Pin1_4	312	317	p.T312S	1381029	haematopoietic_and_lymphoid_tissue	lymphoid_neoplasm	8182933
P04637	DOC_WW_Pin1_4	312	317	p.T312S	1422631	ovary	carcinoma	16183105
P04637	DOC_WW_Pin1_4	312	317	p.T312S	1383294	upper_aerodigestive_tract	carcinoma	10225439
P04637	DOC_WW_Pin1_4	312	317	p.S313C	1379520	lung	carcinoma	10582680
P04637	DOC_WW_Pin1_4	312	317	p.S313N	1371271	central_nervous_system	glioma	8674005
P04637	DOC_WW_Pin1_4	312	317	p.T312S	1396537	upper_aerodigestive_tract	carcinoma	10621852
P04637	DOC_WW_Pin1_4	312	317	p.S313G	1651307	large_intestine	carcinoma
P04637	DOC_WW_Pin1_4	78	83	p.T81S	1651172	large_intestine	carcinoma
P04637	DOC_WW_Pin1_4	78	83	p.T81S	1651172	large_intestine	carcinoma
P04637	DOC_WW_Pin1_4	78	83	p.A79V	1651170	large_intestine	carcinoma
P04637	DOC_WW_Pin1_4	78	83	p.T81S	1651032	large_intestine	carcinoma
P04637	DOC_WW_Pin1_4	78	83	p.A83E	1379574	skin	other	8912828
P04637	DOC_WW_Pin1_4	78	83	p.T81S	1651032	large_intestine	carcinoma
P04637	DOC_WW_Pin1_4	78	83	p.A79V	1395609	upper_aerodigestive_tract	carcinoma	12649174
P04637	DOC_WW_Pin1_4	78	83	p.A79V	1651170	large_intestine	carcinoma
P04637	DOC_WW_Pin1_4	78	83	p.A78V	1386221	breast	carcinoma	7712430
P04637	DOC_WW_Pin1_4	78	83	p.A78V	1386213	breast	carcinoma	7712430
P04637	DOC_WW_Pin1_4	78	83	p.A83V	1960045	urinary_tract	carcinoma	22923433
P04637	DOC_WW_Pin1_4	78	83	p.A79D	1651032	large_intestine	carcinoma
P04637	DOC_WW_Pin1_4	78	83	p.A78S	1665327	large_intestine	carcinoma	21665242
P04637	DOC_WW_Pin1_4	78	83	p.P82L	1524405	haematopoietic_and_lymphoid_tissue	lymphoid_neoplasm	21390130
P04637	DOC_WW_Pin1_4	78	83	p.P82L	1369530	large_intestine	carcinoma	11923604
P04637	DOC_WW_Pin1_4	78	83	p.P82L	1715771	haematopoietic_and_lymphoid_tissue	lymphoid_neoplasm	21680795
P04637	DOC_WW_Pin1_4	78	83	p.P82L	1362546	upper_aerodigestive_tract	carcinoma	11948487
P04637	DOC_WW_Pin1_4	78	83	p.P82L	1360728	salivary_gland	adenoma	12447671
P04637	DOC_WW_Pin1_4	78	83	p.P82L	1360732	salivary_gland	adenoma	12447671
P04637	DOC_WW_Pin1_4	78	83	p.A79D	1651032	large_intestine	carcinoma
P04637	DOC_WW_Pin1_4	78	83	p.P82L	1715771	haematopoietic_and_lymphoid_tissue	lymphoid_neoplasm	21680795
P04637	DOC_WW_Pin1_4	78	83	p.T81I	1364325	central_nervous_system	glioma	10416986
P04637	DOC_WW_Pin1_4	78	83	p.T81I	1384133	skin	other	8943054
P04637	DOC_WW_Pin1_4	78	83	p.P80L	1405550	skin	carcinoma	9349508
P35222	DOC_WW_Pin1_4	243	248	p.G245D	1651171	large_intestine	carcinoma
P35222	DOC_WW_Pin1_4	243	248	p.G245V	1651205	large_intestine	carcinoma
P35222	DOC_WW_Pin1_4	243	248	p.G245V	1651302	large_intestine	carcinoma
P35222	DOC_WW_Pin1_4	243	248	p.G245V	1651008	large_intestine	carcinoma
P35222	DOC_WW_Pin1_4	243	248	p.G245V	1651275	large_intestine	carcinoma
P35222	DOC_WW_Pin1_4	243	248	p.G245A	876709	large_intestine	carcinoma	9294210
P35222	DOC_WW_Pin1_4	243	248	p.G245A	875297	large_intestine	carcinoma	15154912
P35222	DOC_WW_Pin1_4	243	248	p.G245C	1651337	large_intestine	carcinoma
P35222	DOC_WW_Pin1_4	243	248	p.G245C	1651335	large_intestine	carcinoma
P35222	DOC_WW_Pin1_4	243	248	p.G245C	1651339	large_intestine	carcinoma
P35222	DOC_WW_Pin1_4	243	248	p.G245C	1651029	large_intestine	carcinoma
P35222	DOC_WW_Pin1_4	243	248	p.G245C	1650970	large_intestine	carcinoma
P35222	DOC_WW_Pin1_4	243	248	p.G245C	1651258	large_intestine	carcinoma
P40259	LIG_TYR_ITAM	193	210	p.H194N	1765257	lung	carcinoma	22980975
P40259	LIG_TYR_ITAM	193	210	p.Y196N	1635918	haematopoietic_and_lymphoid_tissue	lymphoid_neoplasm	21804550
P40259	LIG_TYR_ITAM	193	210	p.Y196C	1945170	haematopoietic_and_lymphoid_tissue	lymphoid_neoplasm	23292937
P40259	LIG_TYR_ITAM	193	210	p.Y196C	1945114	haematopoietic_and_lymphoid_tissue	lymphoid_neoplasm	23292937
P40259	LIG_TYR_ITAM	193	210	p.Y196C	1629825	haematopoietic_and_lymphoid_tissue	lymphoid_neoplasm	21796119
P40259	LIG_TYR_ITAM	193	210	p.Y196C	1945122	haematopoietic_and_lymphoid_tissue	lymphoid_neoplasm	23292937
P40259	LIG_TYR_ITAM	193	210	p.Y196S	1629826	haematopoietic_and_lymphoid_tissue	lymphoid_neoplasm	21796119
P40259	LIG_TYR_ITAM	193	210	p.Y196F	1629898	haematopoietic_and_lymphoid_tissue	lymphoid_neoplasm	21796119
P40259	LIG_TYR_ITAM	193	210	p.Y196H	1629832	haematopoietic_and_lymphoid_tissue	lymphoid_neoplasm	21796119
P40259	LIG_TYR_ITAM	193	210	p.Y196H	1629820	haematopoietic_and_lymphoid_tissue	lymphoid_neoplasm	21796119
P40259	LIG_TYR_ITAM	193	210	p.Y196H	1945152	haematopoietic_and_lymphoid_tissue	lymphoid_neoplasm	23292937
P40259	LIG_TYR_ITAM	193	210	p.Y196H	1945194	haematopoietic_and_lymphoid_tissue	lymphoid_neoplasm	23292937
P04637	MOD_GSK3_1	30	37	p.S37T	1369553	large_intestine	carcinoma	11923604
P04637	MOD_GSK3_1	30	37	p.S33T	1384386	soft_tissue	gastrointestinal_stromal_tumour	17727479
P04637	MOD_GSK3_1	30	37	p.V31I	1690977	urinary_tract	carcinoma	22493262
P04637	MOD_GSK3_1	30	37	p.V31I	1690973	urinary_tract	carcinoma	22493262
P04637	MOD_GSK3_1	30	37	p.V31I	1412253	lung	carcinoma	1324794
P04637	MOD_GSK3_1	30	37	p.V31I	1389765	lung	carcinoma	15073856
P04637	MOD_GSK3_1	30	37	p.L35F	1413705	pancreas	carcinoma	8513440
P04637	MOD_GSK3_1	30	37	p.L35F	1419682	lung	carcinoma	8934544
P04637	MOD_GSK3_1	30	37	p.L35F	1385953	liver	carcinoma	8093350
P04637	MOD_GSK3_1	30	37	p.P34L	1358727	oesophagus	carcinoma	17982662
P04637	MOD_GSK3_1	30	37	p.P34L	1369693	upper_aerodigestive_tract	carcinoma	10637254
P04637	DOC_WW_Pin1_4	30	35	p.S33T	1384386	soft_tissue	gastrointestinal_stromal_tumour	17727479
P04637	DOC_WW_Pin1_4	30	35	p.V31I	1690977	urinary_tract	carcinoma	22493262
P04637	DOC_WW_Pin1_4	30	35	p.V31I	1690973	urinary_tract	carcinoma	22493262
P04637	DOC_WW_Pin1_4	30	35	p.V31I	1412253	lung	carcinoma	1324794
P04637	DOC_WW_Pin1_4	30	35	p.V31I	1389765	lung	carcinoma	15073856
P04637	DOC_WW_Pin1_4	30	35	p.L35F	1413705	pancreas	carcinoma	8513440
P04637	DOC_WW_Pin1_4	30	35	p.L35F	1419682	lung	carcinoma	8934544
P04637	DOC_WW_Pin1_4	30	35	p.L35F	1385953	liver	carcinoma	8093350
P04637	DOC_WW_Pin1_4	30	35	p.P34L	1358727	oesophagus	carcinoma	17982662
P04637	DOC_WW_Pin1_4	30	35	p.P34L	1369693	upper_aerodigestive_tract	carcinoma	10637254
P04049	LIG_14-3-3_1	256	261	p.S257W	1780073	lung	carcinoma
P04049	LIG_14-3-3_1	256	261	p.S259F	1914039	lung	carcinoma
P04049	LIG_14-3-3_1	256	261	p.S257L	1651122	large_intestine	carcinoma	22810696
P04049	LIG_14-3-3_1	256	261	p.S257L	1914105	lung	carcinoma
P04049	LIG_14-3-3_1	256	261	p.S257L	1565432	large_intestine	carcinoma	21892161
P04049	LIG_14-3-3_1	256	261	p.S257L	1651007	large_intestine	carcinoma
P04049	LIG_14-3-3_1	256	261	p.S259P	1651171	large_intestine	carcinoma
P04049	LIG_14-3-3_1	256	261	p.P261R	1758083	biliary_tract	carcinoma	22824796
P04049	LIG_14-3-3_1	256	261	p.S259A	749760	ovary	carcinoma
P04049	MOD_PKB_1	254	262	p.S257W	1780073	lung	carcinoma
P04049	MOD_PKB_1	254	262	p.S259F	1914039	lung	carcinoma
P04049	MOD_PKB_1	254	262	p.S257L	1651122	large_intestine	carcinoma	22810696
P04049	MOD_PKB_1	254	262	p.S257L	1914105	lung	carcinoma
P04049	MOD_PKB_1	254	262	p.S257L	1565432	large_intestine	carcinoma	21892161
P04049	MOD_PKB_1	254	262	p.S257L	1651007	large_intestine	carcinoma
P04049	MOD_PKB_1	254	262	p.S259P	1651171	large_intestine	carcinoma
P04049	MOD_PKB_1	254	262	p.P261R	1758083	biliary_tract	carcinoma	22824796
P04049	MOD_PKB_1	254	262	p.S259A	749760	ovary	carcinoma
P04637	MOD_PIKK_1	12	18	p.Q16L	1651510	large_intestine	carcinoma
P04637	MOD_PIKK_1	12	18	p.Q16L	722046	lung	carcinoma
P04637	MOD_PIKK_1	12	18	p.Q16L	722046	lung	carcinoma	16140923
P04637	MOD_PIKK_1	12	18	p.Q16L	722046	lung	carcinoma
P04637	MOD_PIKK_1	12	18	p.Q16L	1870269	lung	carcinoma	23033341
P04637	MOD_PIKK_1	12	18	p.T18A	1629870	haematopoietic_and_lymphoid_tissue	lymphoid_neoplasm	21796119
P04637	MOD_PIKK_1	12	18	p.T18A	1629870	haematopoietic_and_lymphoid_tissue	lymphoid_neoplasm	21796119
P04637	MOD_PIKK_1	12	18	p.Q16L	1870269	lung	carcinoma	23033341
P04637	MOD_PIKK_1	12	18	p.Q16L	1651510	large_intestine	carcinoma
P04637	MOD_CK1_1	15	21	p.Q16L	1651510	large_intestine	carcinoma
P04637	MOD_CK1_1	15	21	p.Q16L	722046	lung	carcinoma
P04637	MOD_CK1_1	15	21	p.Q16L	722046	lung	carcinoma	16140923
P04637	MOD_CK1_1	15	21	p.Q16L	722046	lung	carcinoma
P04637	MOD_CK1_1	15	21	p.Q16L	1870269	lung	carcinoma	23033341
P04637	MOD_CK1_1	15	21	p.T18A	1629870	haematopoietic_and_lymphoid_tissue	lymphoid_neoplasm	21796119
P04637	MOD_CK1_1	15	21	p.T18A	1629870	haematopoietic_and_lymphoid_tissue	lymphoid_neoplasm	21796119
P04637	MOD_CK1_1	15	21	p.Q16L	1870269	lung	carcinoma	23033341
P04637	MOD_CK1_1	15	21	p.Q16L	1651510	large_intestine	carcinoma
O43683	DEG_APCC_KENBOX_2	534	538	p.N534D	1651009	large_intestine	carcinoma
O43683	DEG_APCC_KENBOX_2	534	538	p.N534D	1651637	large_intestine	carcinoma
O43683	DEG_APCC_KENBOX_2	534	538	p.N534D	1651282	large_intestine	carcinoma
O43683	DEG_APCC_KENBOX_2	534	538	p.N534S	1651337	large_intestine	carcinoma
O43683	DEG_APCC_KENBOX_2	534	538	p.N534S	1474908	ovary	carcinoma	21720365
O43683	DEG_APCC_KENBOX_2	534	538	p.N534S	1651322	large_intestine	carcinoma
P46531	DEG_SCF_FBW7_2	2508	2515	p.S2514F	1287995	haematopoietic_and_lymphoid_tissue	lymphoid_neoplasm	19794083
P46531	DEG_SCF_FBW7_2	2508	2515	p.P2513L	1307073	haematopoietic_and_lymphoid_tissue	lymphoid_neoplasm	20008304
P46531	DEG_SCF_FBW7_2	2508	2515	p.P2513L	1288042	haematopoietic_and_lymphoid_tissue	lymphoid_neoplasm	19794083
P46531	DEG_SCF_FBW7_2	2508	2515	p.P2513L	1288043	haematopoietic_and_lymphoid_tissue	lymphoid_neoplasm	19794083
P46531	DEG_SCF_FBW7_2	2508	2515	p.P2512L	1788893	haematopoietic_and_lymphoid_tissue	lymphoid_neoplasm	23040356
P46531	DEG_SCF_FBW7_2	2508	2515	p.P2512L	1151826	haematopoietic_and_lymphoid_tissue	lymphoid_neoplasm	17515920
